# Supplementary material for: Synthesis of fused tetrahydropyrido[2,3-c]coumarin derivatives as potential inhibitors for dopamine d3 receptors, catalyzed by hydrated ferric sulfate
Source: Royal Society of Chemistry journal article supplement (doi:10.1039/c3ra45174g), 2013-12-03

## Supporting Information

### Synthesis of fused tetrahydropyrido[2,3-c]coumarin derivatives as potential inhibitors for dopamine d3 receptors, catalyzed by hydrated ferric sulfate

Deb K. Das,<sup>a</sup> Satavisha Sarkar,<sup>a</sup> Abu T. Khan,<sup>a,b\*</sup> Parameswaran Saravanan<sup>c</sup>, Sanjukta Patra<sup>c</sup>

<sup>a</sup> *Department of Chemistry, Indian Institute of Technology Guwahati, Guwahati 781 039, India*

<sup>b</sup> *Vice-Chancellor, Aliah University, DN-18, 8th Floor, Sector V, Salt Lake, Kolkata-700 091, West Bengal India*

<sup>c</sup> *Department of Biotechnology, Indian Institute of Technology Guwahati, Guwahati 781 039, India*

Tel.: +91 361 2582305; fax: +91 361 2582349.

E-mail address: atk@iitg.ernet.in (A.T. Khan).

|                                                                  |      |
|------------------------------------------------------------------|------|
| Title page                                                       | 1    |
| Experimental General                                             | 2    |
| Crystal description                                              | 2-3  |
| Docking Analysis of tetrahydropyrido[2,3-c] coumarin derivatives | 4-5  |
| Copy of <sup>1</sup> H, <sup>13</sup> C NMR and HRMS spectra     | 6-83 |

## Experimental General

Melting points were recorded on a Büchi melting point apparatus and are uncorrected. IR spectra were recorded on Perkin-Elmer 281 IR spectrophotometer.  $^1\text{H}$  and  $^{13}\text{C}$  NMR spectra were recorded on Varian 400 spectrometer by using TMS as internal reference; chemical shifts ( $\delta$  scale) are reported in parts per million (ppm). Elemental analyses were carried out using Perkin-Elmer 2400 Series II CHNS/O analyzer at the Department of Chemistry, Indian Institute of Technology Guwahati. Column chromatographic separations were performed using Merck silica gel (60-120 mesh).

## Crystallographic Description

Crystal data were collected with Bruker Smart Apex-II CCD diffractometer using graphite monochromated  $\text{MoK}\alpha$  radiation ( $\lambda = 0.71073 \text{ \AA}$ ) at 296 K. Cell parameters were retrieved using SMART software and refined with SAINT on all observed reflections. Data reduction was performed with the SAINT software and corrected for Lorentz and polarization effects. Absorption corrections were applied with the program SADABS. The structure was solved by direct methods implemented in SHELX-97 program and refined by full-matrix least-squares methods on F2. All non-hydrogen atomic positions were located in difference Fourier maps and refined anisotropically. The hydrogen atoms were placed in their geometrically generated positions. Compound **4c** empirical formula  $\text{C}_{21}\text{H}_{18}\text{ClNO}_3$ , colorless crystal, formula wt 367.81, Triclinic, P-1,  $a = 9.4104(10) \text{ \AA}$ ,  $b = 9.6627(9) \text{ \AA}$ ,  $c = 10.6311(10) \text{ \AA}$ ,  $V = 866.08(15) \text{ \AA}^3$ ,  $Z = 2$ ,  $F(000) = 384$ ,  $\text{GOF}(S) = 1.004$ . Final indices  $R_{\text{obs}} = 0.0384$ ,  $wR_{\text{obs}} = 0.0815$  with  $I > 2r(I)$ ;  $R_{\text{all}} = 0.0504$ ,  $wR_{\text{all}} = 0.0865$  for all data. Compound **5o** empirical formula  $\text{C}_{18}\text{H}_{15}\text{NO}_4$ , colorless crystal, formula wt 309.31, Monoclinic, P 21/c,  $a = 11.8099(5) \text{ \AA}$ ,  $b = 9.7399(5) \text{ \AA}$ ,  $c = 12.7370(6) \text{ \AA}$ ,  $V = 1461.83(12) \text{ \AA}^3$ ,  $Z = 4$ ,  $F(000) = 648$ ,  $\text{GOF}(S) = 1.031$ . Final indices  $R_{\text{obs}} = 0.0503$ ,  $wR_{\text{obs}} = 0.1131$  with  $I > 2r(I)$ ;  $R_{\text{all}} = 0.0920$ ,  $wR_{\text{all}} = 0.1292$  for all data.

Table S1. Crystal data and structure refinement for **4c** and **5o**. For atomic coordinates and equivalent isotropic displacement parameters and bond angles, please check the CIF.

|                      | Compound 4c (trans<br>CCDC811857)         | Compound 5o (cis<br>CCDC 838311)        |
|----------------------|-------------------------------------------|-----------------------------------------|
| Identification code  | Cl-AC-DHP                                 | Fur-AC-DHP                              |
| Empirical formula    | $\text{C}_{21}\text{H}_{18}\text{ClNO}_3$ | $\text{C}_{18}\text{H}_{15}\text{NO}_4$ |
| Formula weight       | 367.81                                    | 309.31                                  |
| Temperature          | 296(2) K                                  | 296(2) K                                |
| Wavelength           | 0.71073 $\text{ \AA}$                     | 0.71073 $\text{ \AA}$                   |
| Crystal system       | Triclinic                                 | Monoclinic                              |
| Space group          | P-1                                       | 'P 21/c'                                |
| Unit cell dimensions |                                           |                                         |
| a                    | 9.4104(10) $\text{ \AA}$                  | 11.8099(5) $\text{ \AA}$                |
| b                    | 9.6627(9) $\text{ \AA}$                   | 9.7399(5) $\text{ \AA}$                 |

|                                   |                                                       |                                                       |
|-----------------------------------|-------------------------------------------------------|-------------------------------------------------------|
| c                                 | 10.6311(10) Å                                         | 12.7370(6) Å                                          |
| $\alpha$                          | 78.191(5)                                             | 90.00°                                                |
| $\beta$                           | 66.629(6)°                                            | 93.828°(2)                                            |
| $\gamma$                          | 89.263(5)°                                            | 90.00°                                                |
| Volume                            | 866.08(15) Å <sup>3</sup>                             | 1461.83(12) Å <sup>3</sup>                            |
| Z                                 | 2                                                     | 4                                                     |
| Density (calculated)              | 1.410 g/cm <sup>3</sup>                               | 1.405 g/cm <sup>3</sup>                               |
| Absorption coefficient            | 0.242 mm <sup>-1</sup>                                | 0.100 mm <sup>-1</sup>                                |
| F(000)                            | 384                                                   | 648                                                   |
| Theta range for data collection   | 2.14 to 28.34°                                        | 1.73 to 34.04°                                        |
| Index ranges                      | -11 ≤ h ≤ 11, -11 ≤ k ≤ 12, -12 ≤ l ≤ 14              | -18 ≤ h ≤ 18, -13 ≤ k ≤ 13, -18 ≤ l ≤ 19              |
| Reflections collected             | 6806                                                  | 22111                                                 |
| Independent reflections           | 4322 R <sub>int</sub> = 0.0415                        | 5974 R <sub>int</sub> = 0.0273                        |
| Completeness to $\theta^\circ$    | 98.4% ( $\theta = 28.34^\circ$ )                      | 97.8% ( $\theta = 34.04^\circ$ )                      |
| Refinement method                 | Full-matrix least-squares on F <sup>2</sup>           | Full-matrix least-squares on F <sup>2</sup>           |
| Data / restraints / parameters    | 4322 / 0 / 240                                        | 5448 / 0 / 212                                        |
| Goodness-of-fit on F <sup>2</sup> | 1.004                                                 | 1.031                                                 |
| Final R indices [ $>2\sigma(I)$ ] | R <sub>obs</sub> = 0.0384, wR <sub>obs</sub> = 0.0815 | R <sub>obs</sub> = 0.0503, wR <sub>obs</sub> = 0.1131 |
| R indices (all data)              | R <sub>all</sub> = 0.0504, wR <sub>all</sub> = 0.0865 | R <sub>all</sub> = 0.0920, wR <sub>all</sub> = 0.1292 |
| Largest diff. peak and hole       | 0.216 and -0.210 e.Å <sup>-3</sup>                    | 0.173 and -0.210 e.Å <sup>-3</sup>                    |

Table SI2. Docking analysis of the synthesized compounds on chain A of human dopamine D3 receptor (PDB Id: 3PBL)

| Product   | Score  | Substituents, n                                                            | Conformations in the largest cluster [out of 100] | H-bond interactions | Pi interactions | Hydrophobic contact residues  |
|-----------|--------|----------------------------------------------------------------------------|---------------------------------------------------|---------------------|-----------------|-------------------------------|
| <b>5r</b> | -10.56 | Me(C <sub>4'</sub> ), NO <sub>2</sub> ( C <sub>10</sub> ), n=2             | 100                                               | S192                | F345            | V86                           |
| <b>5g</b> | -10.46 | OMe(C <sub>4'</sub> ), OMe(C <sub>3'</sub> ),<br>H( C <sub>10</sub> ), n=2 | 100                                               | -                   | F345            | V86, L89, V111,<br>I183       |
| <b>5d</b> | -9.94  | Br(C <sub>4'</sub> ), H( C <sub>10</sub> ), n=2                            | 100                                               | -                   | F345            | V86, V111, I183               |
| <b>5c</b> | -9.73  | Cl(C <sub>4'</sub> ), H( C <sub>10</sub> ), n=2                            | 100                                               | -                   | F345            | V86, V111, I183               |
| <b>5b</b> | -9.6   | Me(C <sub>1'</sub> ), H( C <sub>10</sub> ), n=2                            | 100                                               | -                   | F345            | V86, V111, I183               |
| <b>5f</b> | -9.54  | OMe(C <sub>4'</sub> ), H( C <sub>10</sub> ), n=2                           | 100                                               | -                   | F345            | V86, L89, V111,<br>I183       |
| <b>5m</b> | -9.51  | Br (C <sub>4'</sub> ), H( C <sub>10</sub> ), n=1                           | 100                                               | -                   | F345            | V86, V111                     |
| <b>5l</b> | -9.28  | Cl (C <sub>4'</sub> ), H( C <sub>10</sub> ), n=1                           | 100                                               | -                   | F345            | V86, V111, F345               |
| <b>4f</b> | -9.26  | OMe(C <sub>4'</sub> ), H( C <sub>10</sub> ), n=2                           | 100                                               | Y365                | -               | V86, L89, F106,<br>V107, T369 |
| <b>5p</b> | -9.24  | Cl(C <sub>4'</sub> ), Br( C <sub>10</sub> ), n=2                           | 100                                               | -                   | F345            | V107, I183,<br>F345           |
| <b>5a</b> | -9.11  | H(C <sub>4'</sub> ), H( C <sub>10</sub> ), n=2                             | 100                                               | -                   | F345            | V86, L89, V111,<br>I183       |
| <b>5e</b> | -9.10  | F(C <sub>4'</sub> ), H( C <sub>10</sub> ), n=2                             | 100                                               | -                   | F345            | V86, V111, I183               |
| <b>5n</b> | -9.09  | MeO(C <sub>4'</sub> ), H( C <sub>10</sub> ), n=1                           | 100                                               | -                   | F345            | V86, V111, I183               |
| <b>5k</b> | -8.92  | H(C <sub>4'</sub> ), H( C <sub>10</sub> ), n=1                             | 100                                               | -                   | F345            | V111, C114,<br>F346           |
| <b>5s</b> | -8.80  | Cl, (C <sub>4'</sub> ), MeO<br>( C <sub>10</sub> ), n=2                    | 100                                               | -                   | F345            | V86, V107,<br>I183, F345      |
| <b>5o</b> | -8.39  | Furfuryl(C <sub>4</sub> ),<br>H( C <sub>10</sub> ), n=1                    | 100                                               | I183                | -               | V111, C114,<br>S196           |
| <b>5h</b> | -8.36  | Furfuryl(C <sub>4</sub> ),<br>H( C <sub>10</sub> ), n=2                    | 100                                               | -                   | F345            | I183                          |
| <b>5q</b> | -8.11  | Furfuryl(C <sub>4</sub> ),<br>Br ( C <sub>10</sub> ), n=2                  | 100                                               | -                   | F345            | V107, I183                    |
| <b>4g</b> | -8.10  | OMe(C <sub>4'</sub> ), OMe(C <sub>3'</sub> ),<br>H( C <sub>10</sub> ), n=2 | 100                                               | D110                | F345            | I183, F345,<br>H349, T369     |
| <b>4s</b> | -8.01  | Cl, (C <sub>4'</sub> ), MeO ( C <sub>10</sub> ),<br>n=2                    | 100                                               | Y365                | -               | V86, L89, F106,<br>V107, T369 |
| <b>4d</b> | -7.99  | Br(C <sub>4'</sub> ), H( C <sub>10</sub> ), n=2                            | 100                                               | Y365                | -               | V86, L89, F106,<br>V107, T369 |



|           |        |                                                               |     |      |      |                                    |
|-----------|--------|---------------------------------------------------------------|-----|------|------|------------------------------------|
| <b>4o</b> | -7.98  | Furfuryl (C <sub>4</sub> ), H( C <sub>10</sub> ),<br>n=1      | 100 | Y365 | -    | V86, L89, F106,<br>V107, T369      |
| <b>4k</b> | -7.94  | H(C <sub>4</sub> ), H( C <sub>10</sub> ), n=1                 | 100 | D110 | F345 | I183, F345,<br>H349                |
| <b>4h</b> | -7.91  | Furfuryl(C <sub>4</sub> ), H( C <sub>10</sub> ),<br>n=2       | 100 | Y365 | F345 | S182, F345,<br>T369, F345          |
| <b>4b</b> | -7.89  | Me(C <sub>4</sub> ), H( C <sub>10</sub> ), n=2                | 100 | Y365 | -    | V86, L89, F106,<br>V107, T369      |
| <b>4c</b> | -7.86  | Cl(C <sub>4</sub> ), H( C <sub>10</sub> ), n=2                | 100 | Y365 | -    | V86, L89, F106,<br>V107, T369      |
| <b>4l</b> | -7.64  | Cl (C <sub>4</sub> ), H( C <sub>10</sub> ), n=1               | 100 | D110 | F345 | S182, W342,<br>F345, T369,<br>F345 |
| <b>4p</b> | -7.32  | Cl(C <sub>4</sub> ), Br( C <sub>10</sub> ), n=2               | 100 | Y365 | -    | V86, T369                          |
| <b>4q</b> | -7.30  | Furfuryl(C <sub>4</sub> ), Br ( C <sub>10</sub> ),<br>n=2     | 100 | D110 | F345 | I183, F345                         |
| <b>4m</b> | -7.28  | Br (C <sub>4</sub> ), H( C <sub>10</sub> ), n=1               | 100 | D110 | F345 | L89, F345                          |
| <b>4c</b> | -7.27  | Cl(C <sub>4</sub> ), H( C <sub>10</sub> ), n=2                | 100 | Y365 | -    | V86, L89, F106,<br>V107, T369      |
| <b>4e</b> | -7.12  | F(C <sub>4</sub> ), H( C <sub>10</sub> ), n=2                 | 100 | Y365 | -    | V86, L89, F106,<br>V107, T369      |
| <b>4a</b> | -7.04  | H(C <sub>4</sub> ), H( C <sub>10</sub> ), n=2                 | 72  | D110 | F345 | S182, F345,<br>H349, T369          |
| <b>4r</b> | -6.95  | Me(C <sub>4</sub> ), NO <sub>2</sub> ( C <sub>10</sub> ), n=2 | 100 | D110 | F345 | L89, S182,<br>W342, F345,<br>T369  |
| <b>4n</b> | -6.40  | MeO(C <sub>4</sub> ), H( C <sub>10</sub> ), n=1               | 85  | D110 | F345 | L89, F345                          |
| ETQ*      | -8.207 | compute_AutoDock41_score.py                                   |     |      |      |                                    |

# <sup>1</sup>H NMR Spectra of Compound (4a)

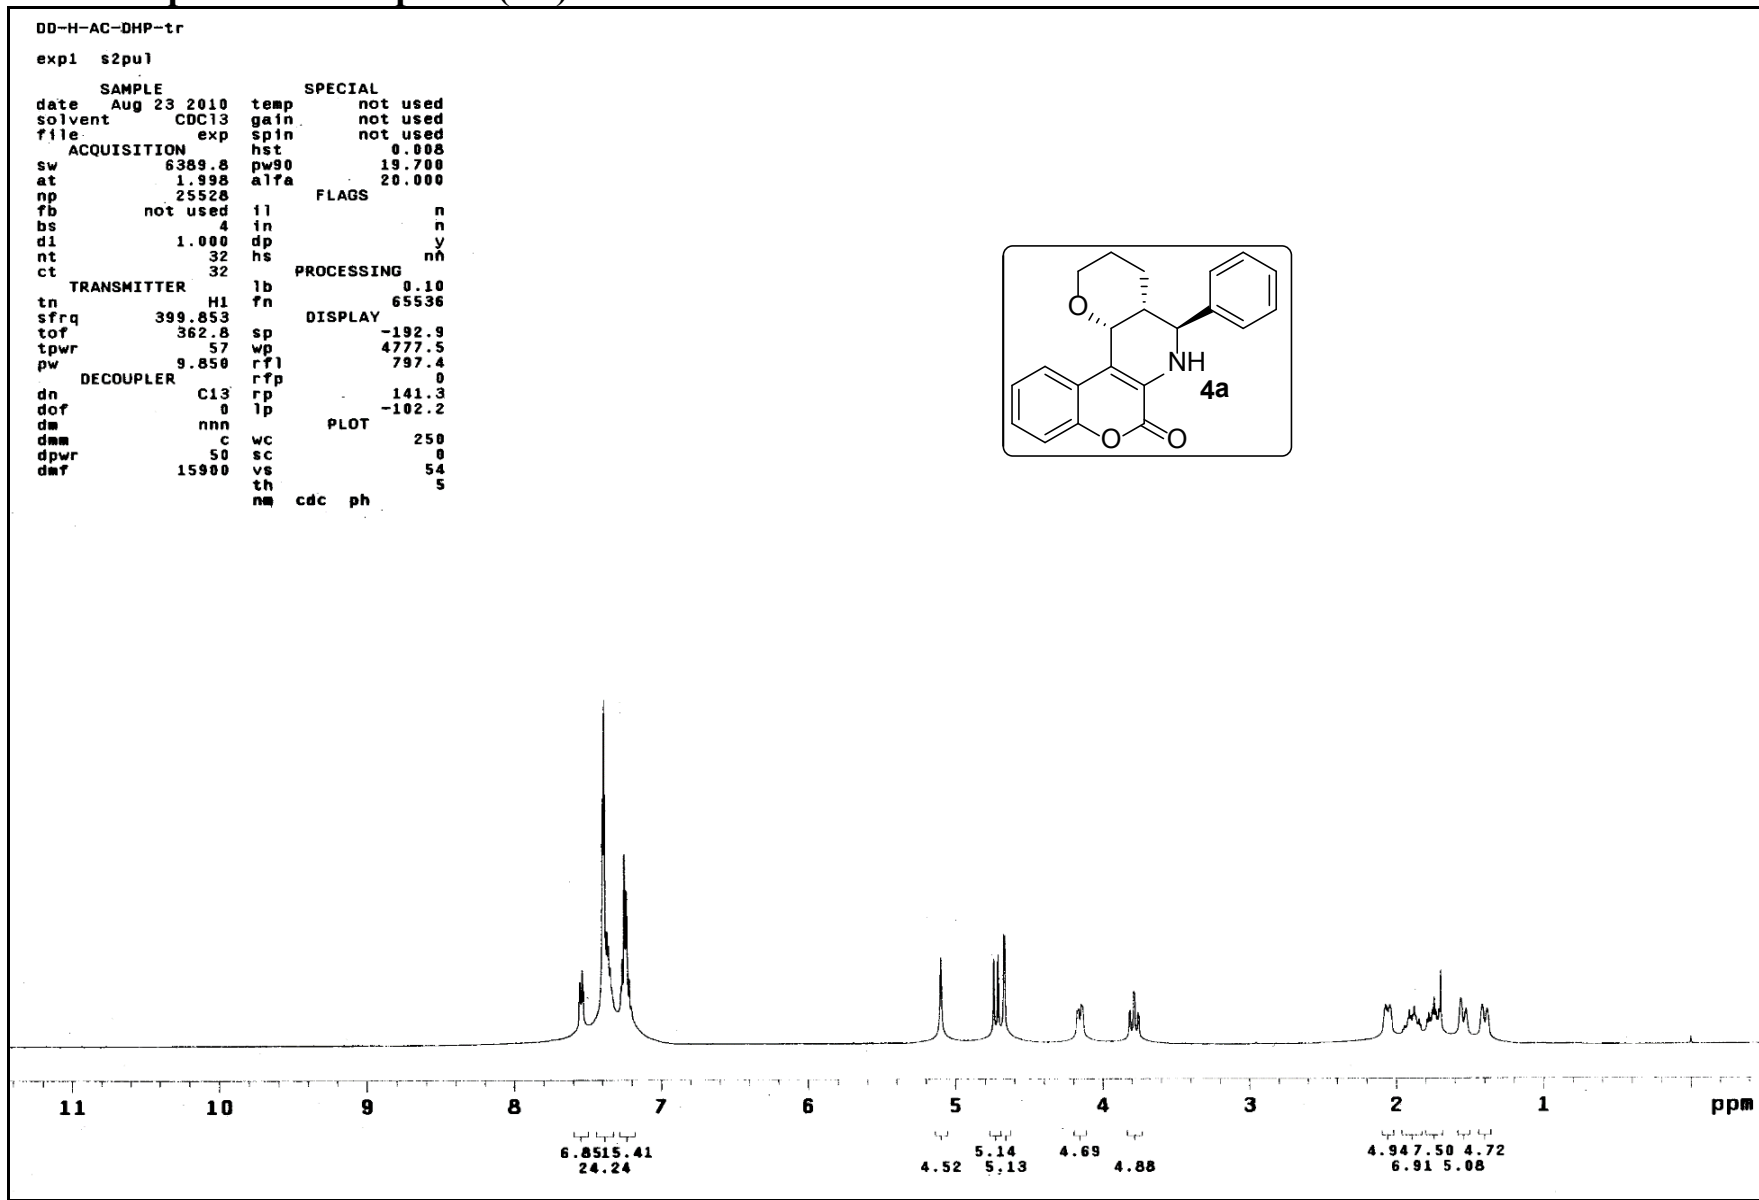

### <sup>13</sup>CNMR of Compound (4a)

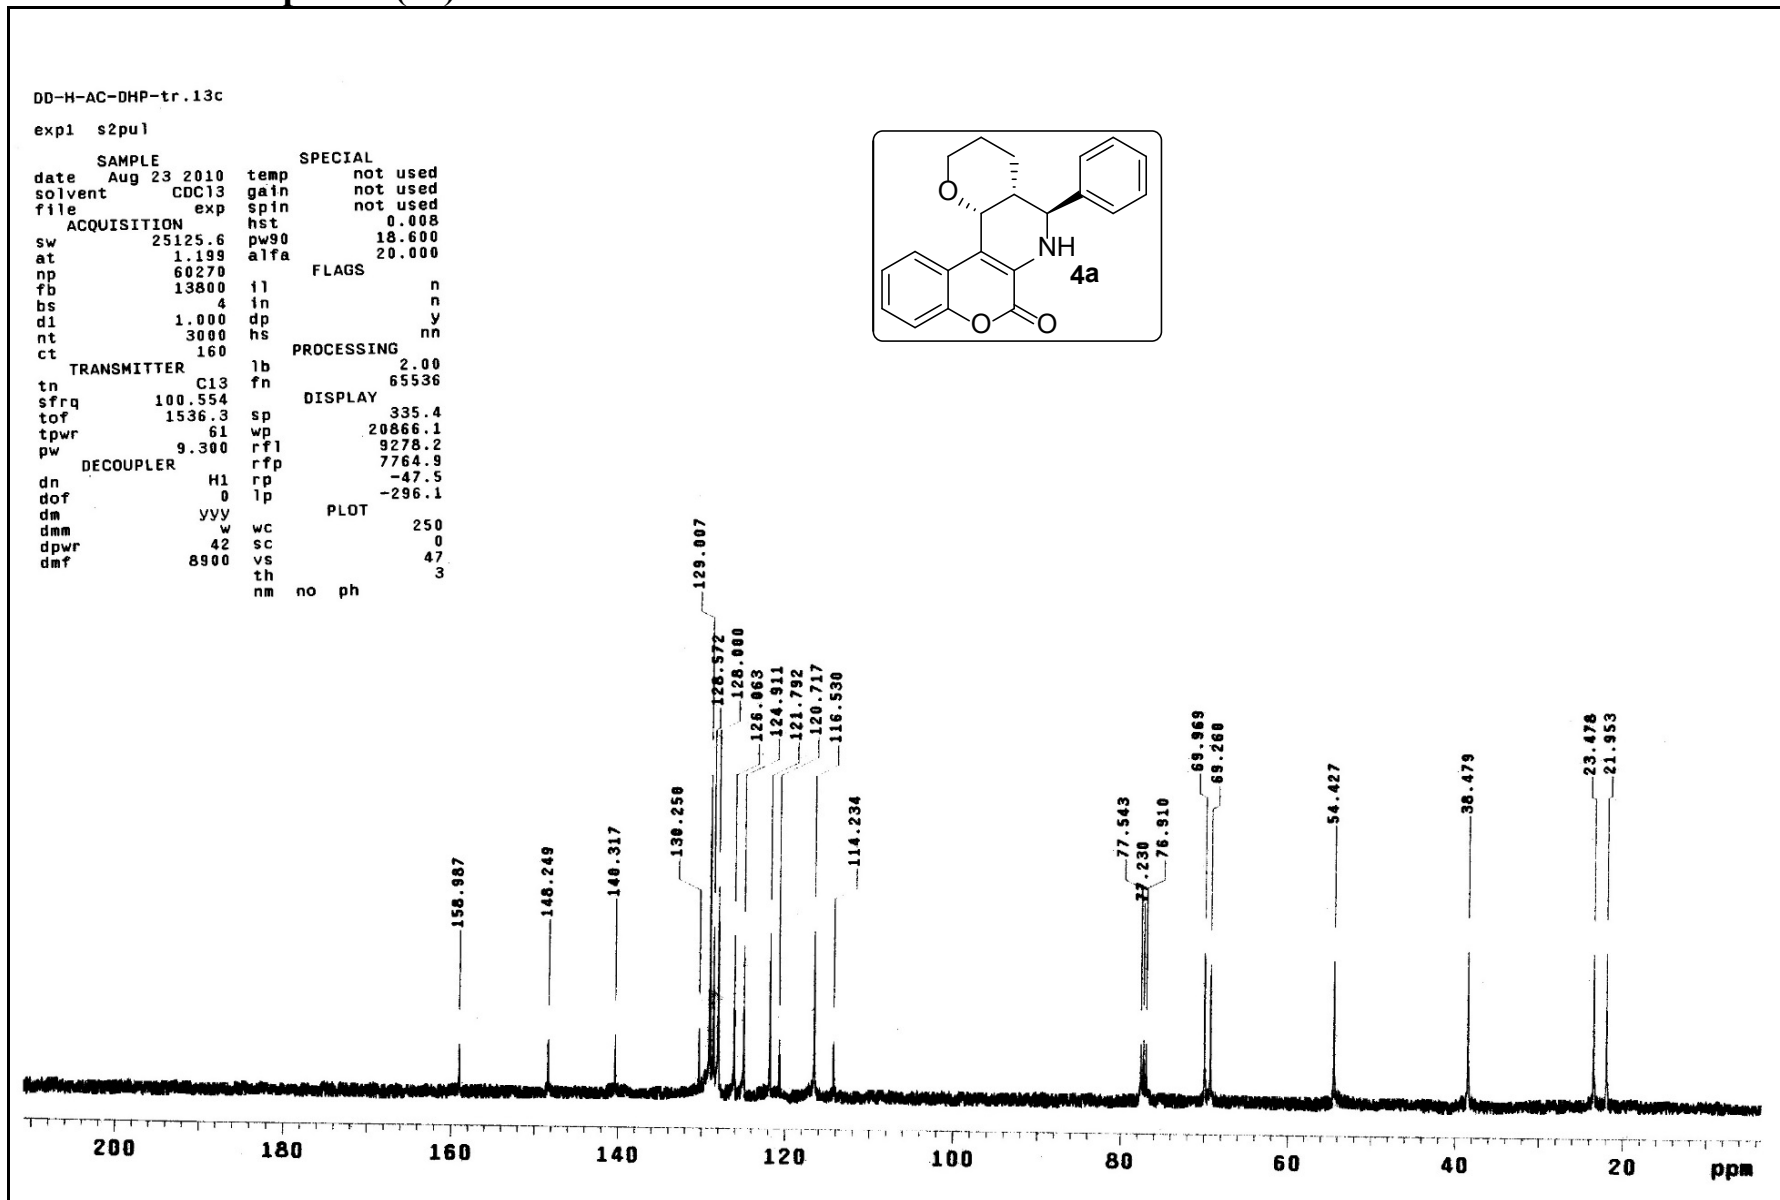

# <sup>1</sup>H NMR Spectra of Compound (5a)

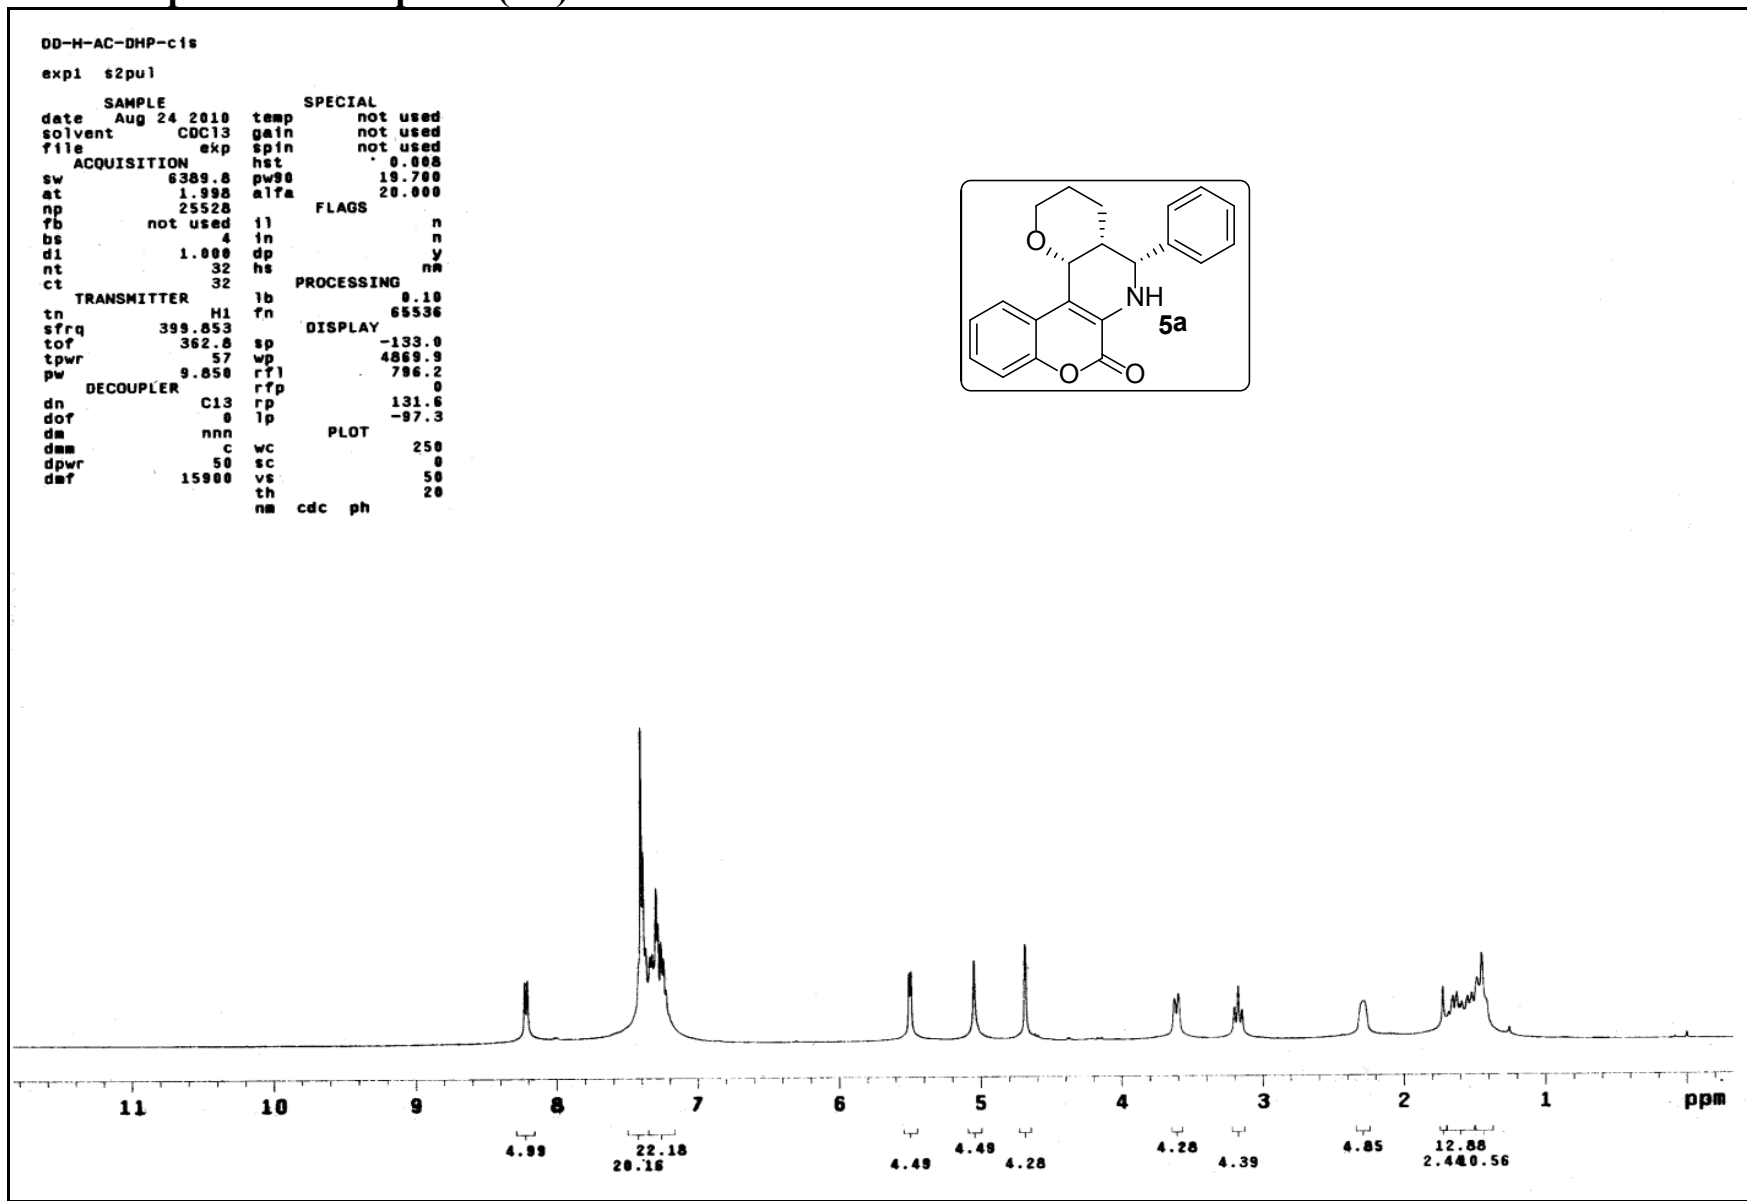

### <sup>13</sup>C NMR of Compound (5a)

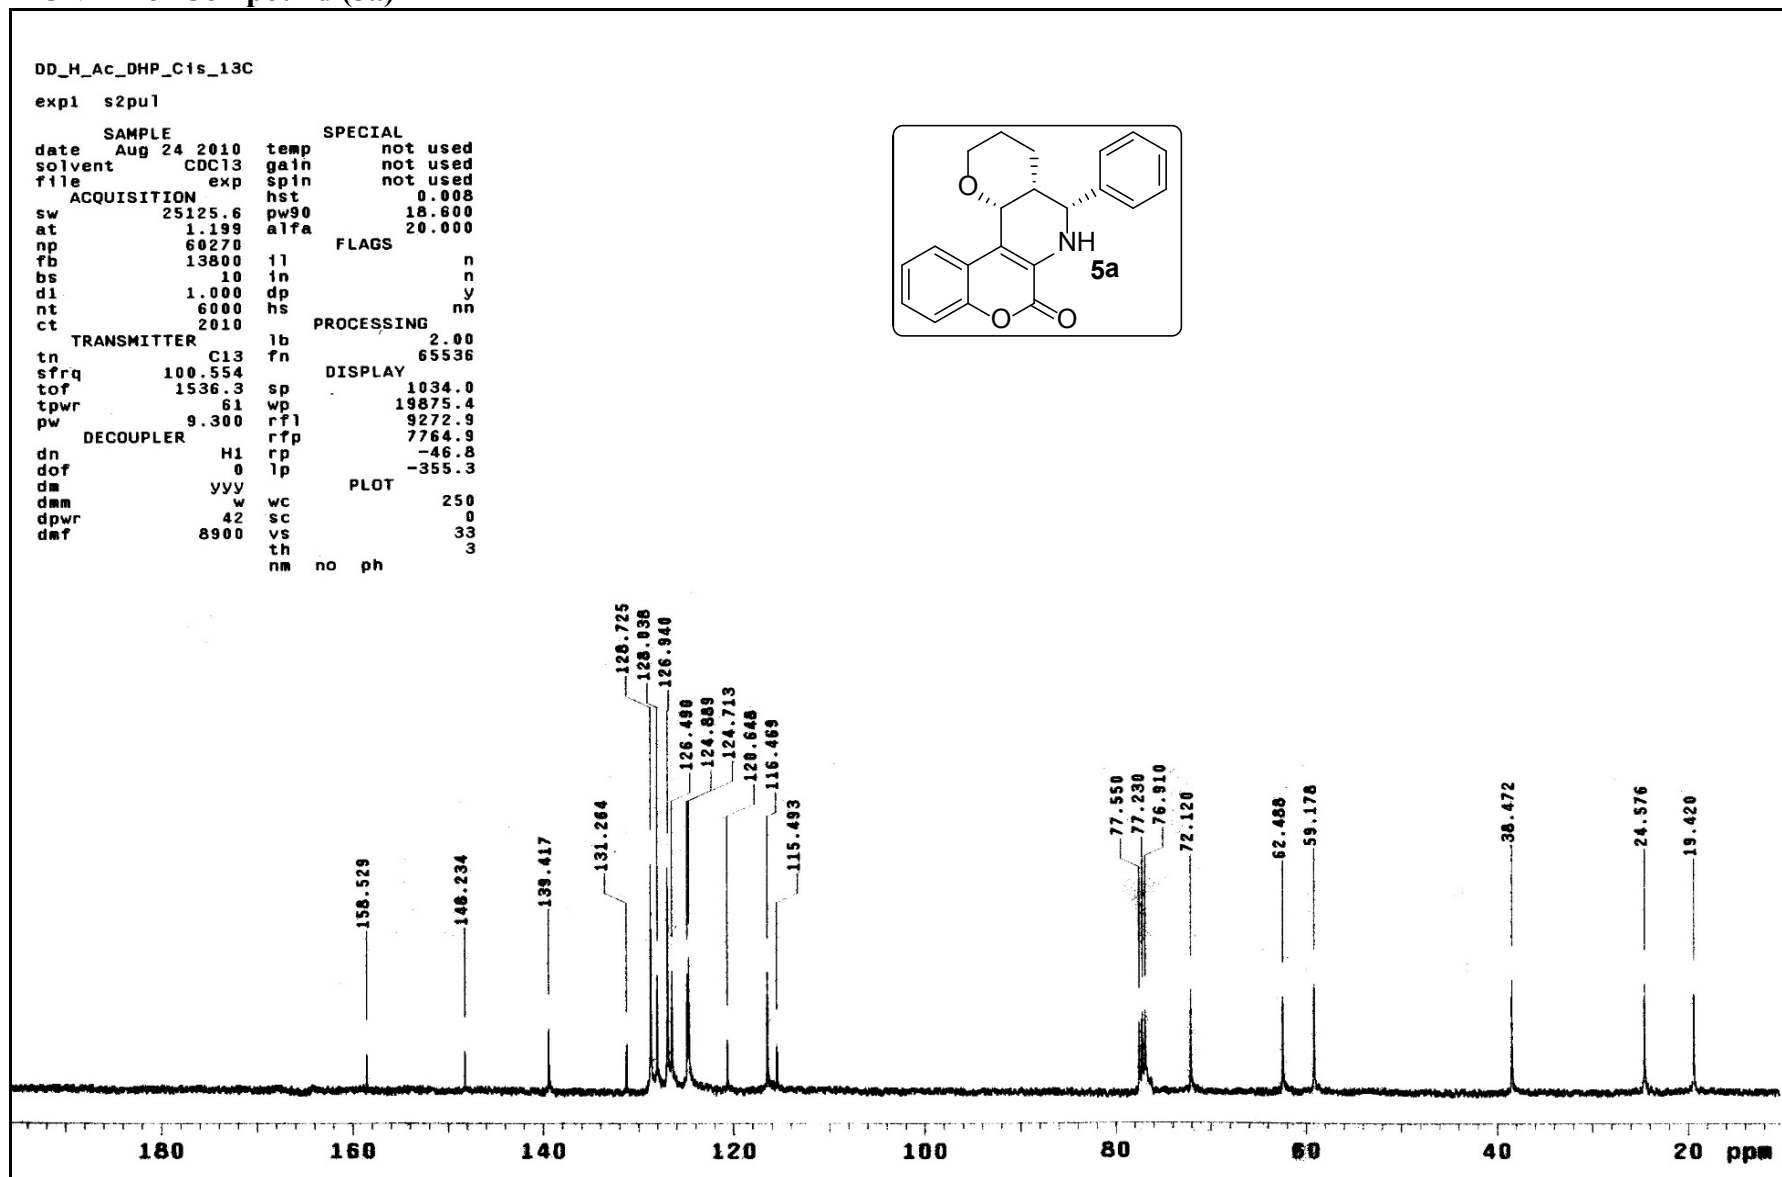

## HRMS of Compound (a)

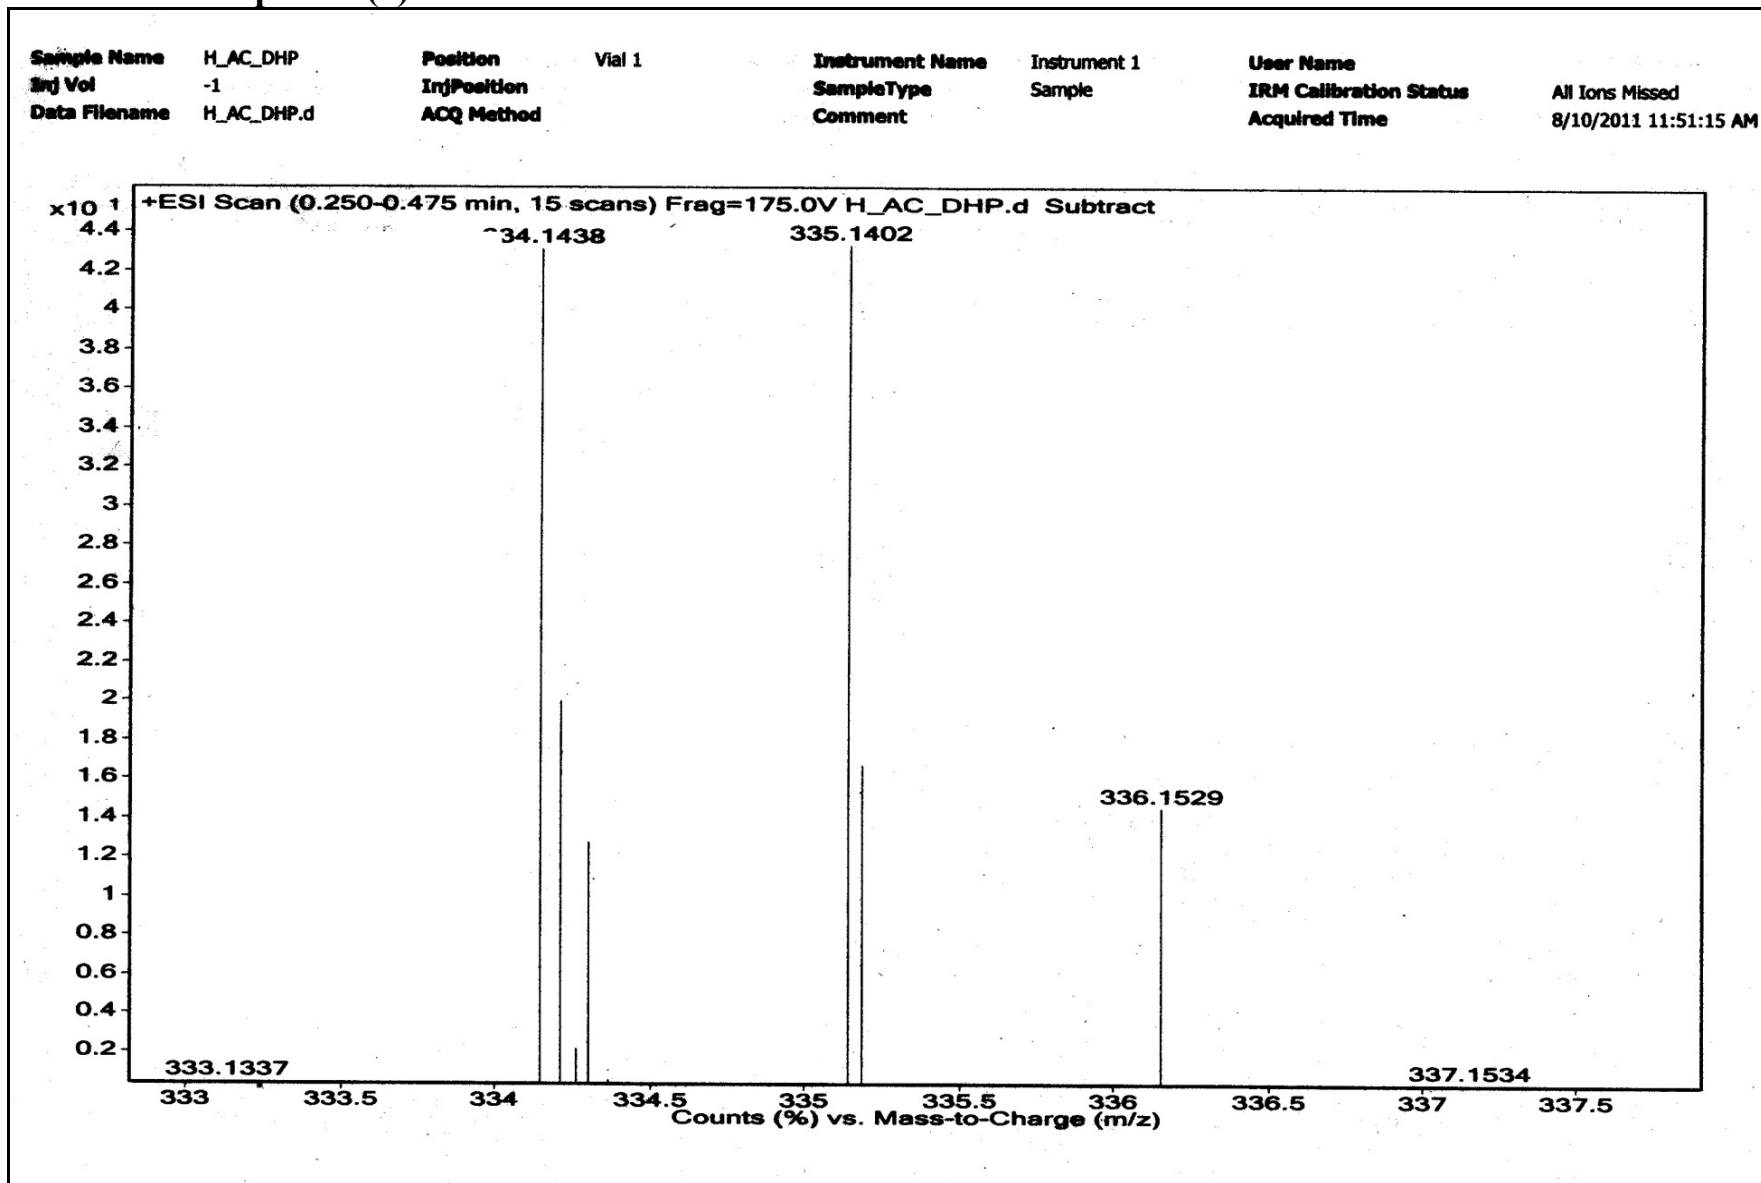

# <sup>1</sup>H NMR Spectra of Compound( 4b)

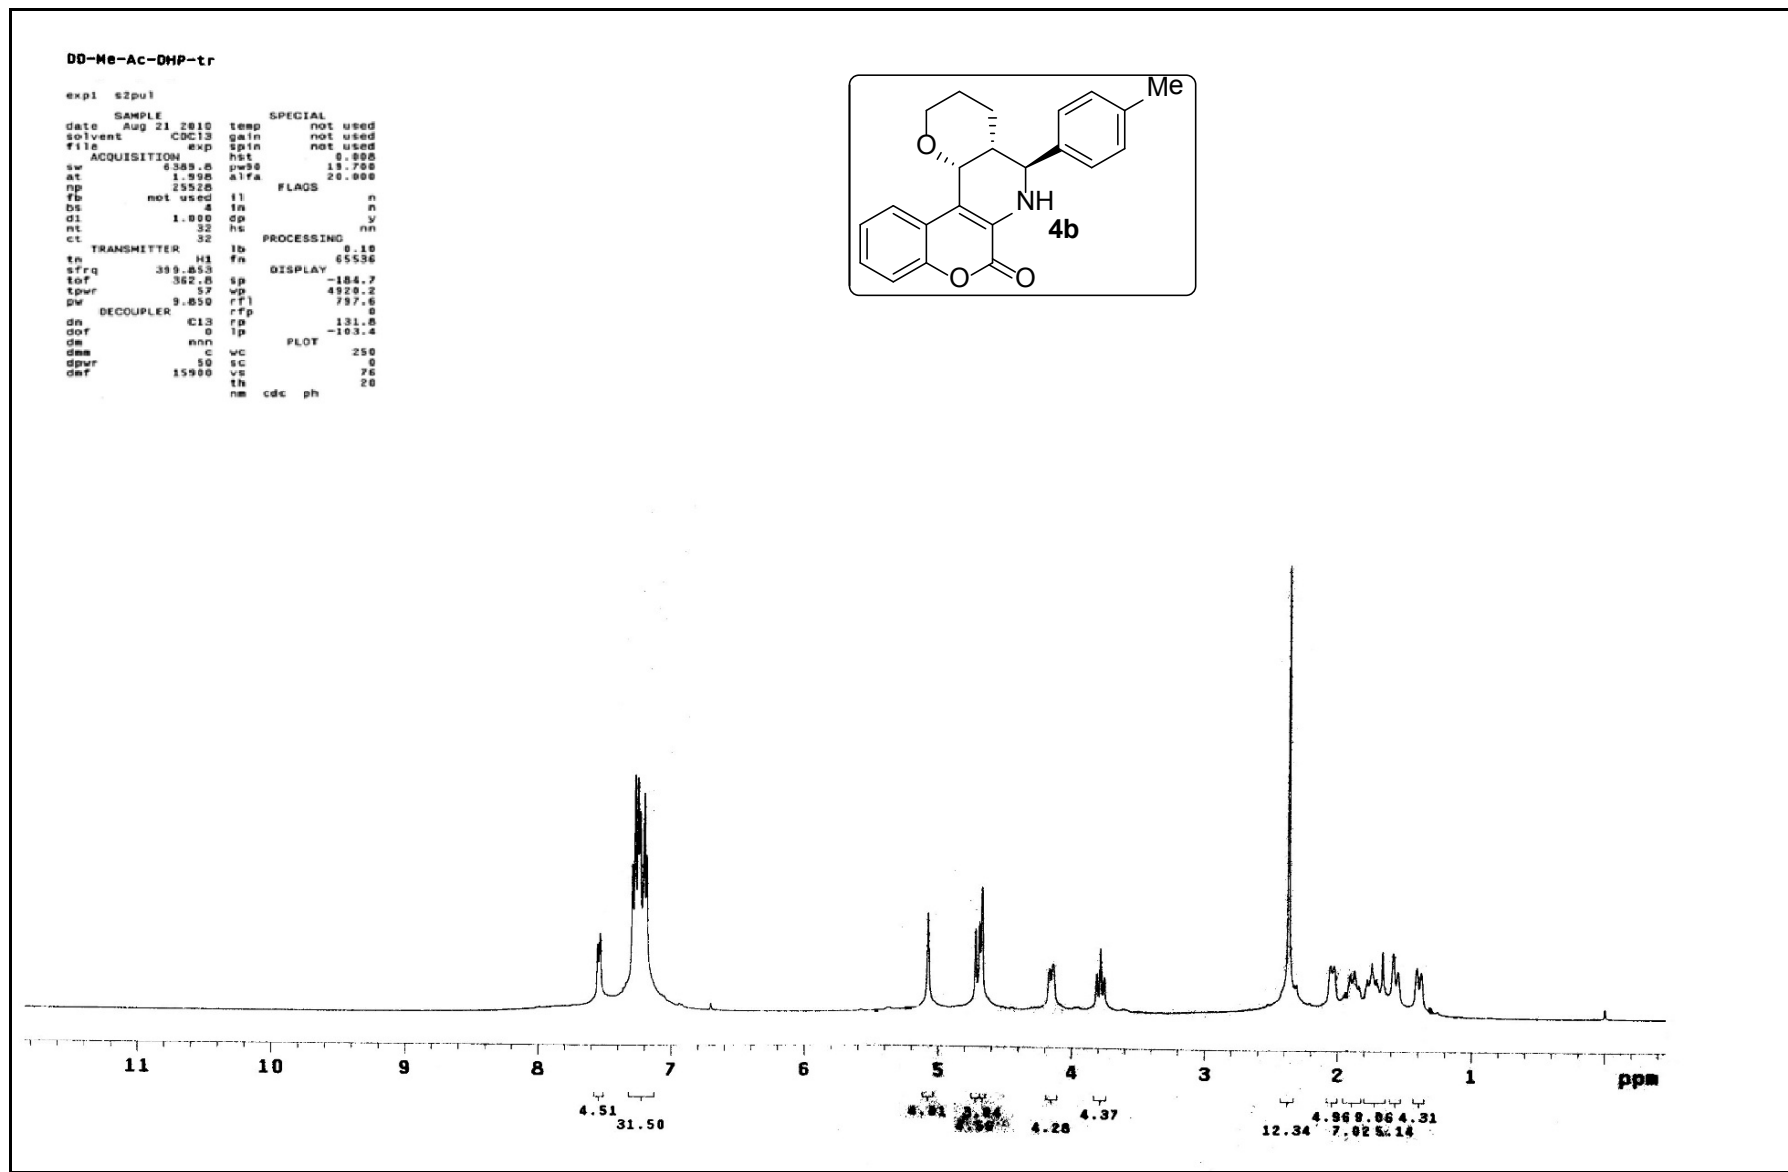

### 13 CNMR of Compound (4b)

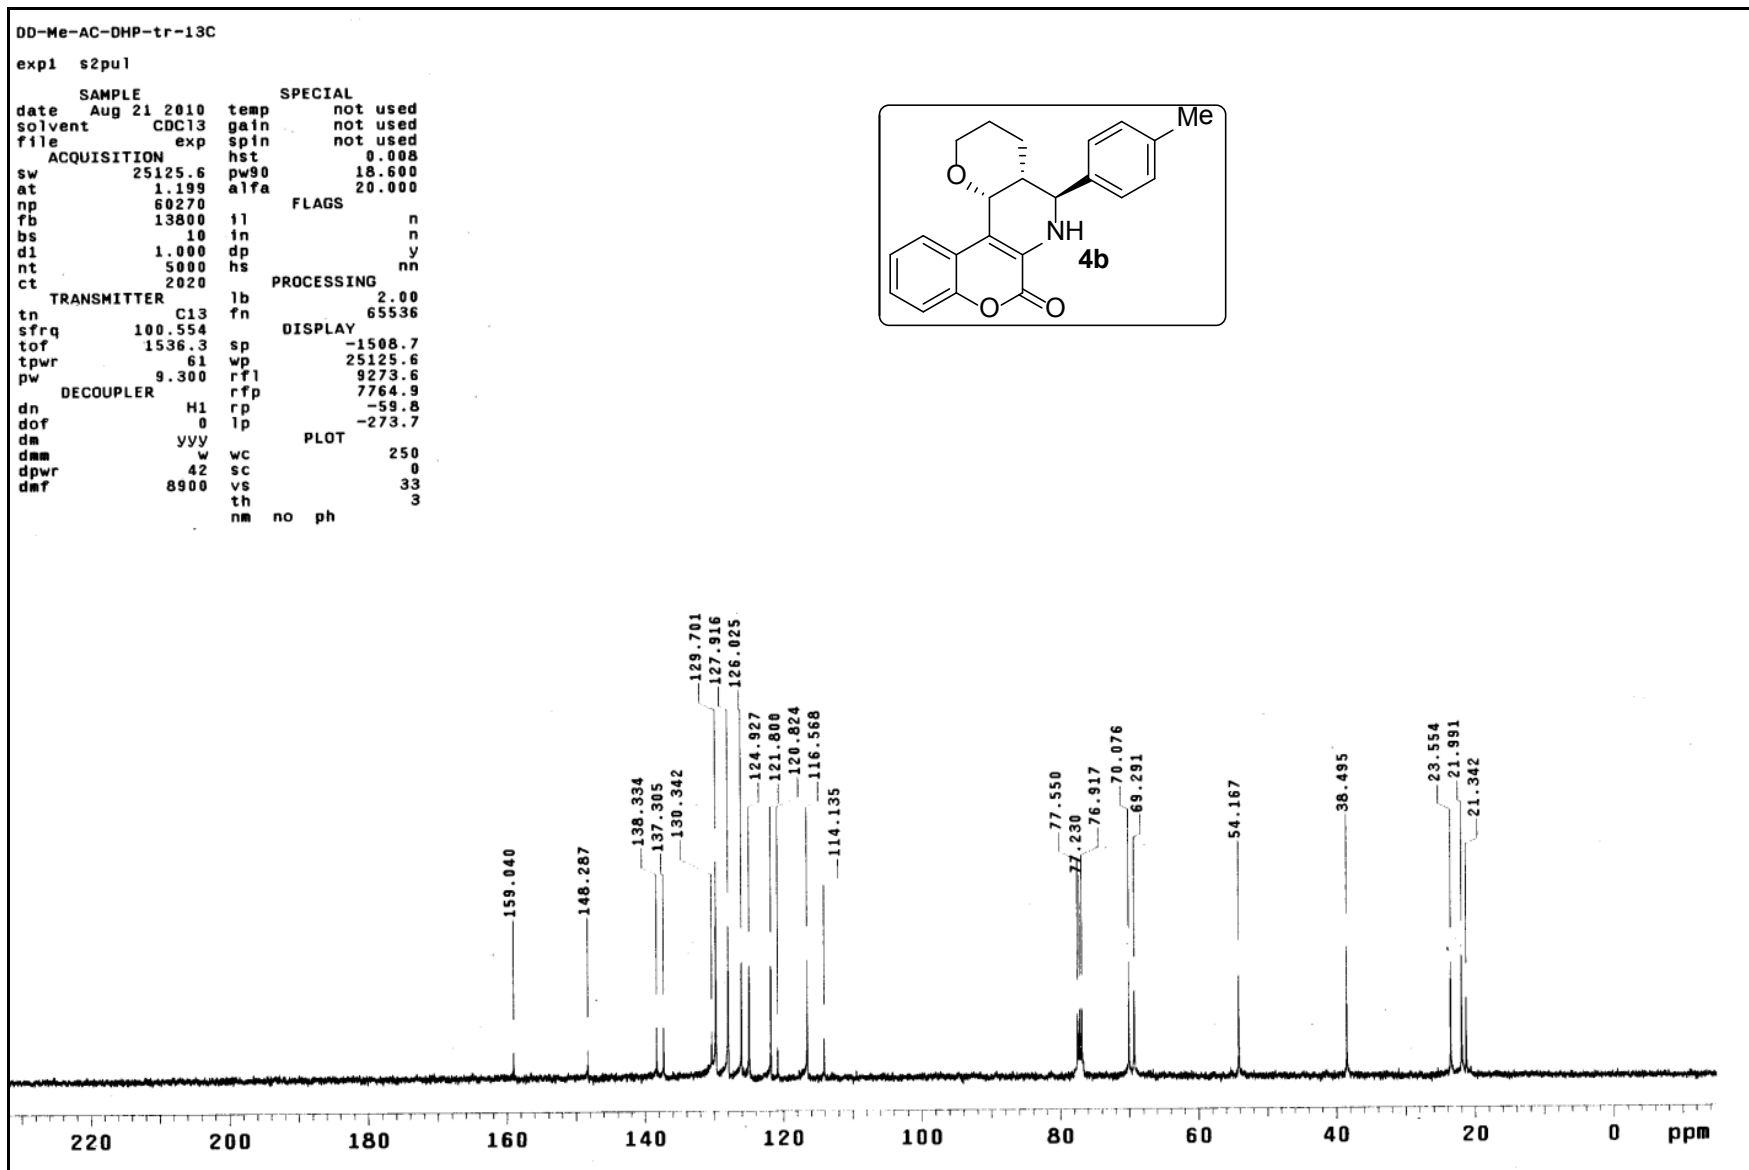



## <sup>1</sup>H NMR Spectra of Compound (5b)

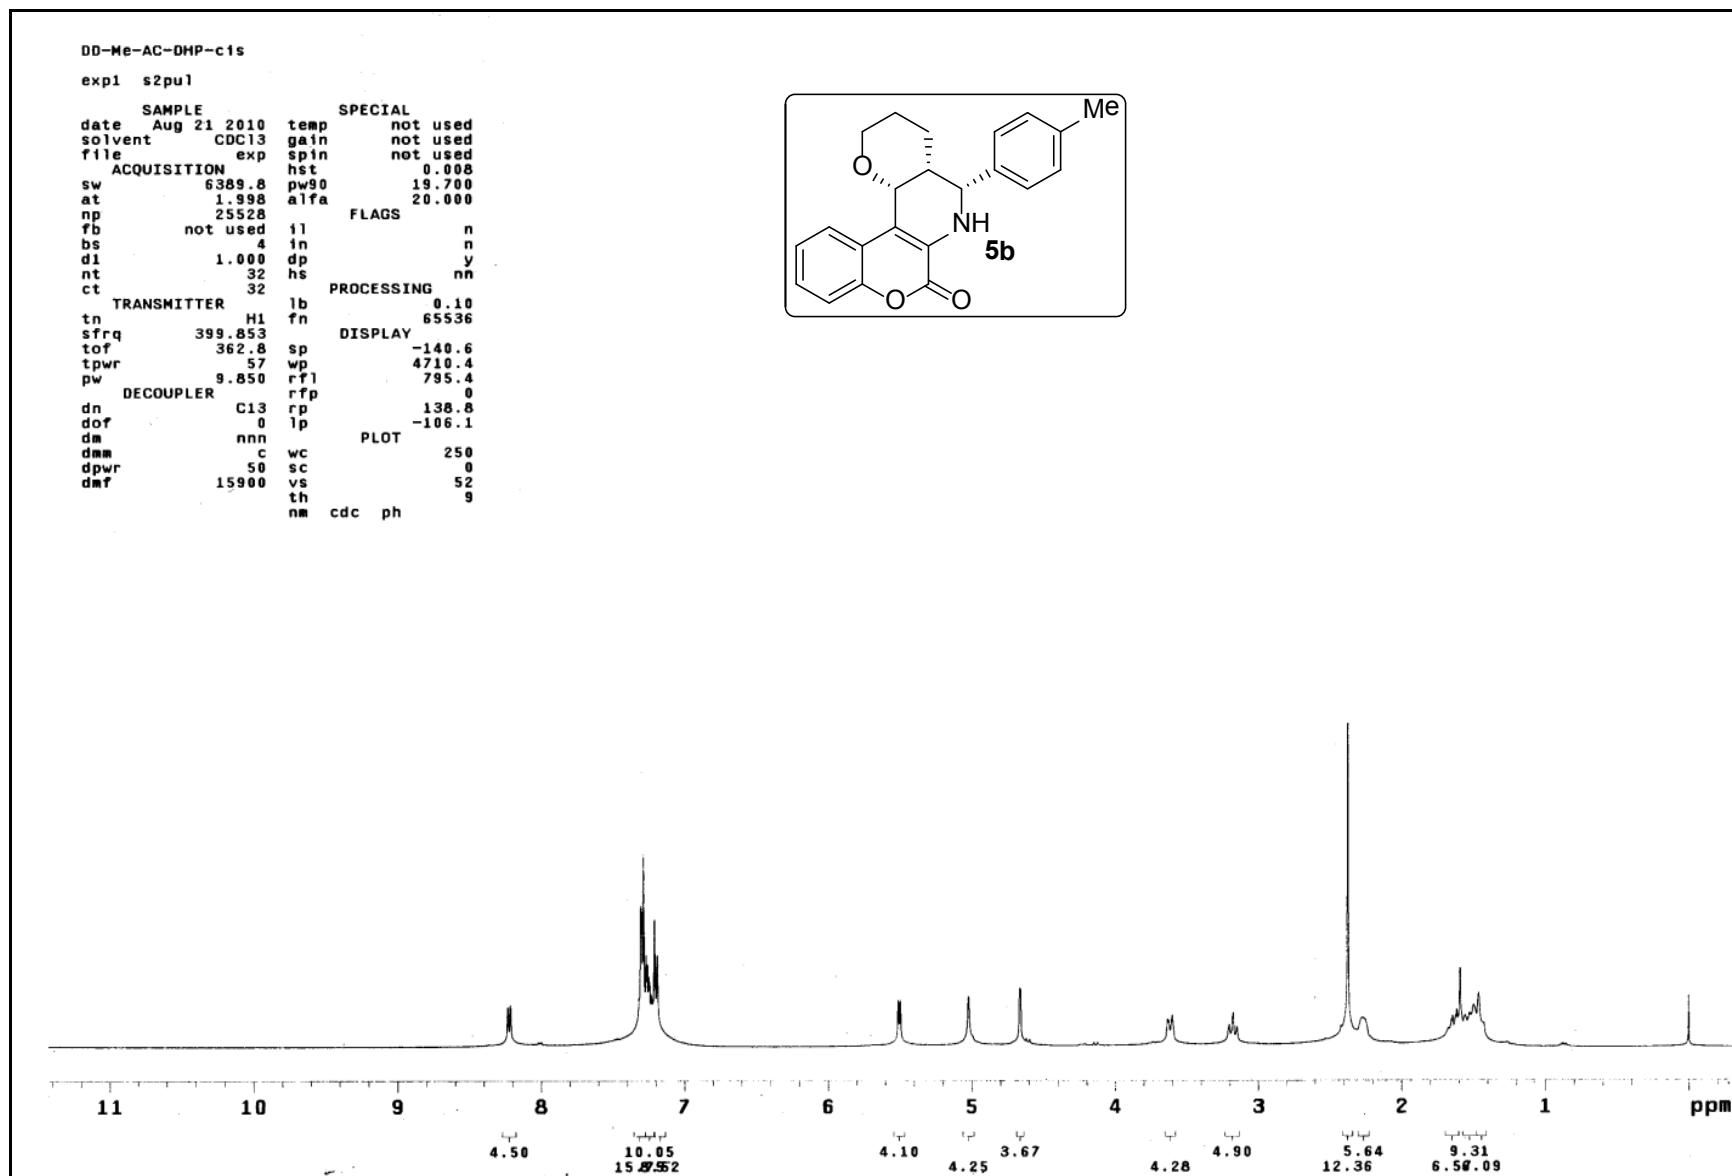

### 13 CNMR of Compound (5b)

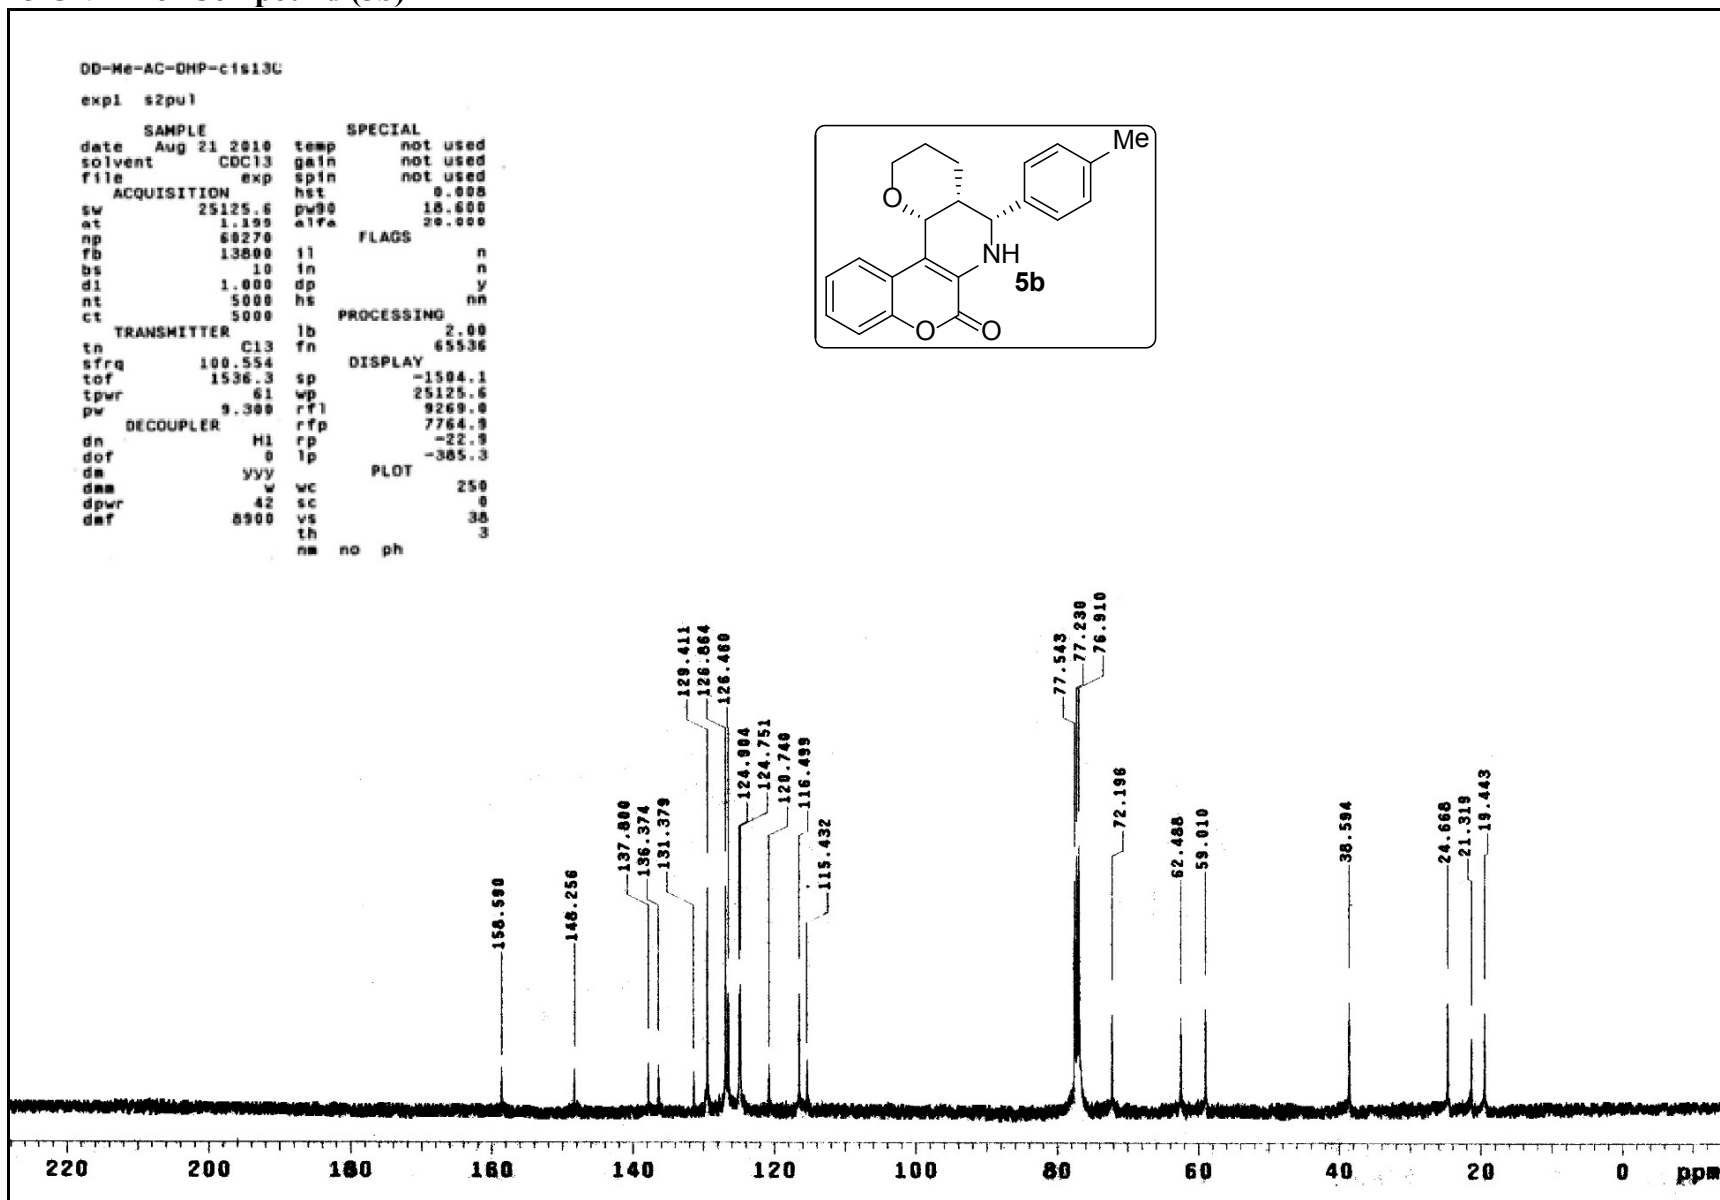

## HRMS of Compound (b)

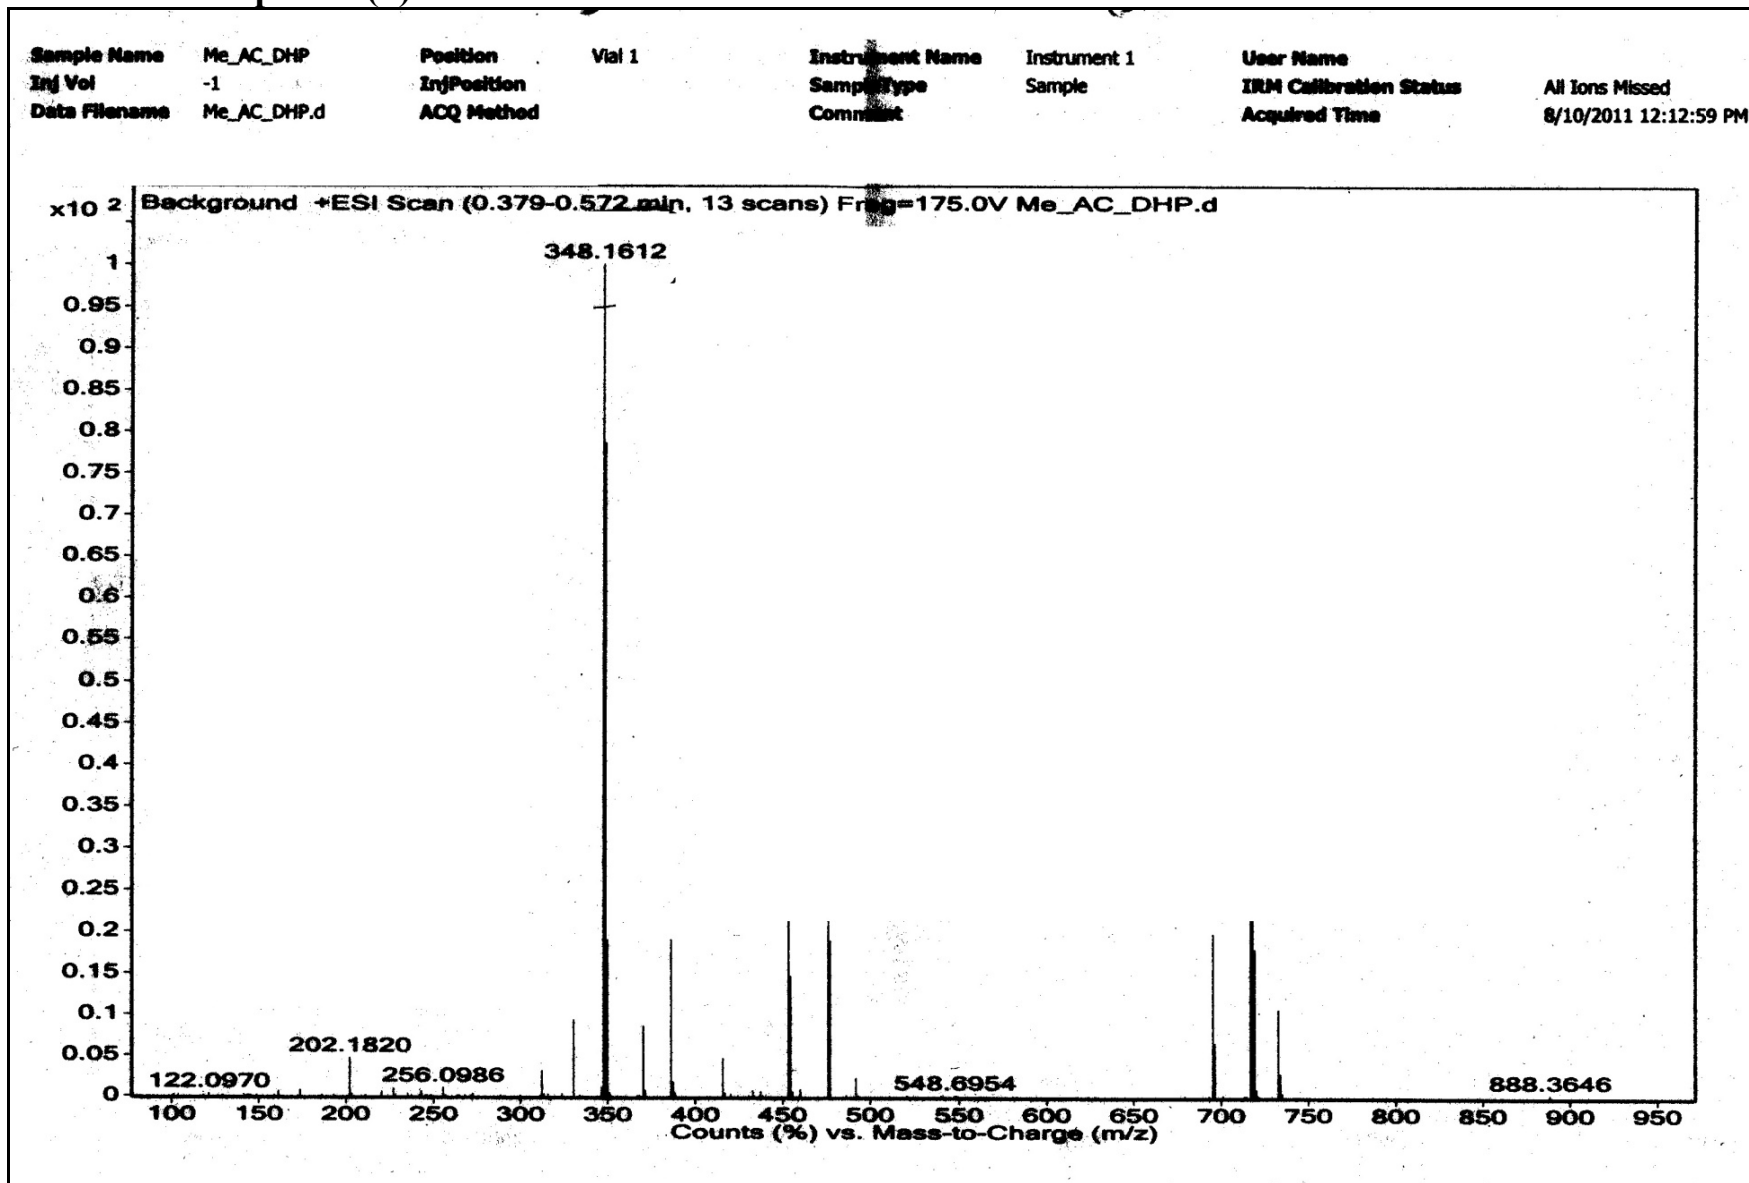

Expansion  $^1\text{H}$ NMR spectra for determining the trans : cis ratio for Compound (c)

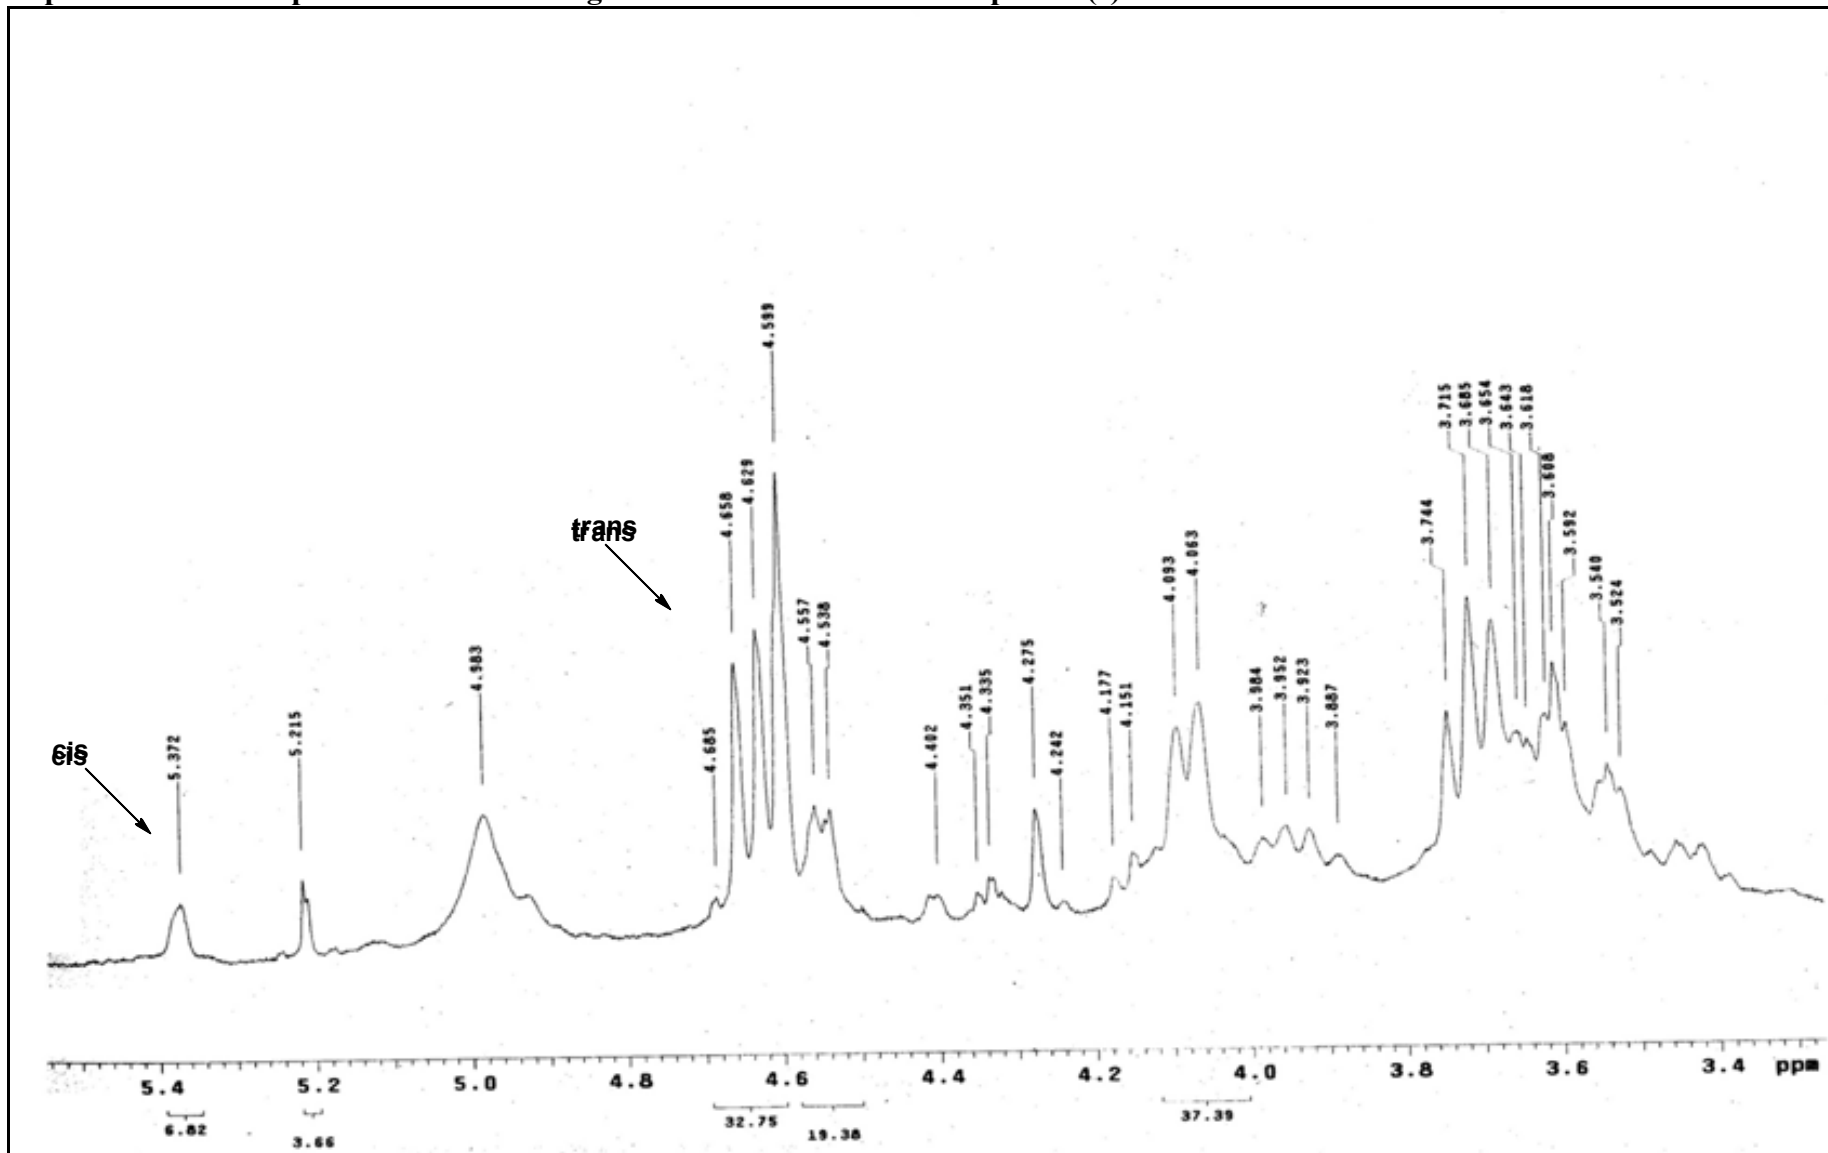

### <sup>1</sup>H NMR Spectra of Compound (4c)

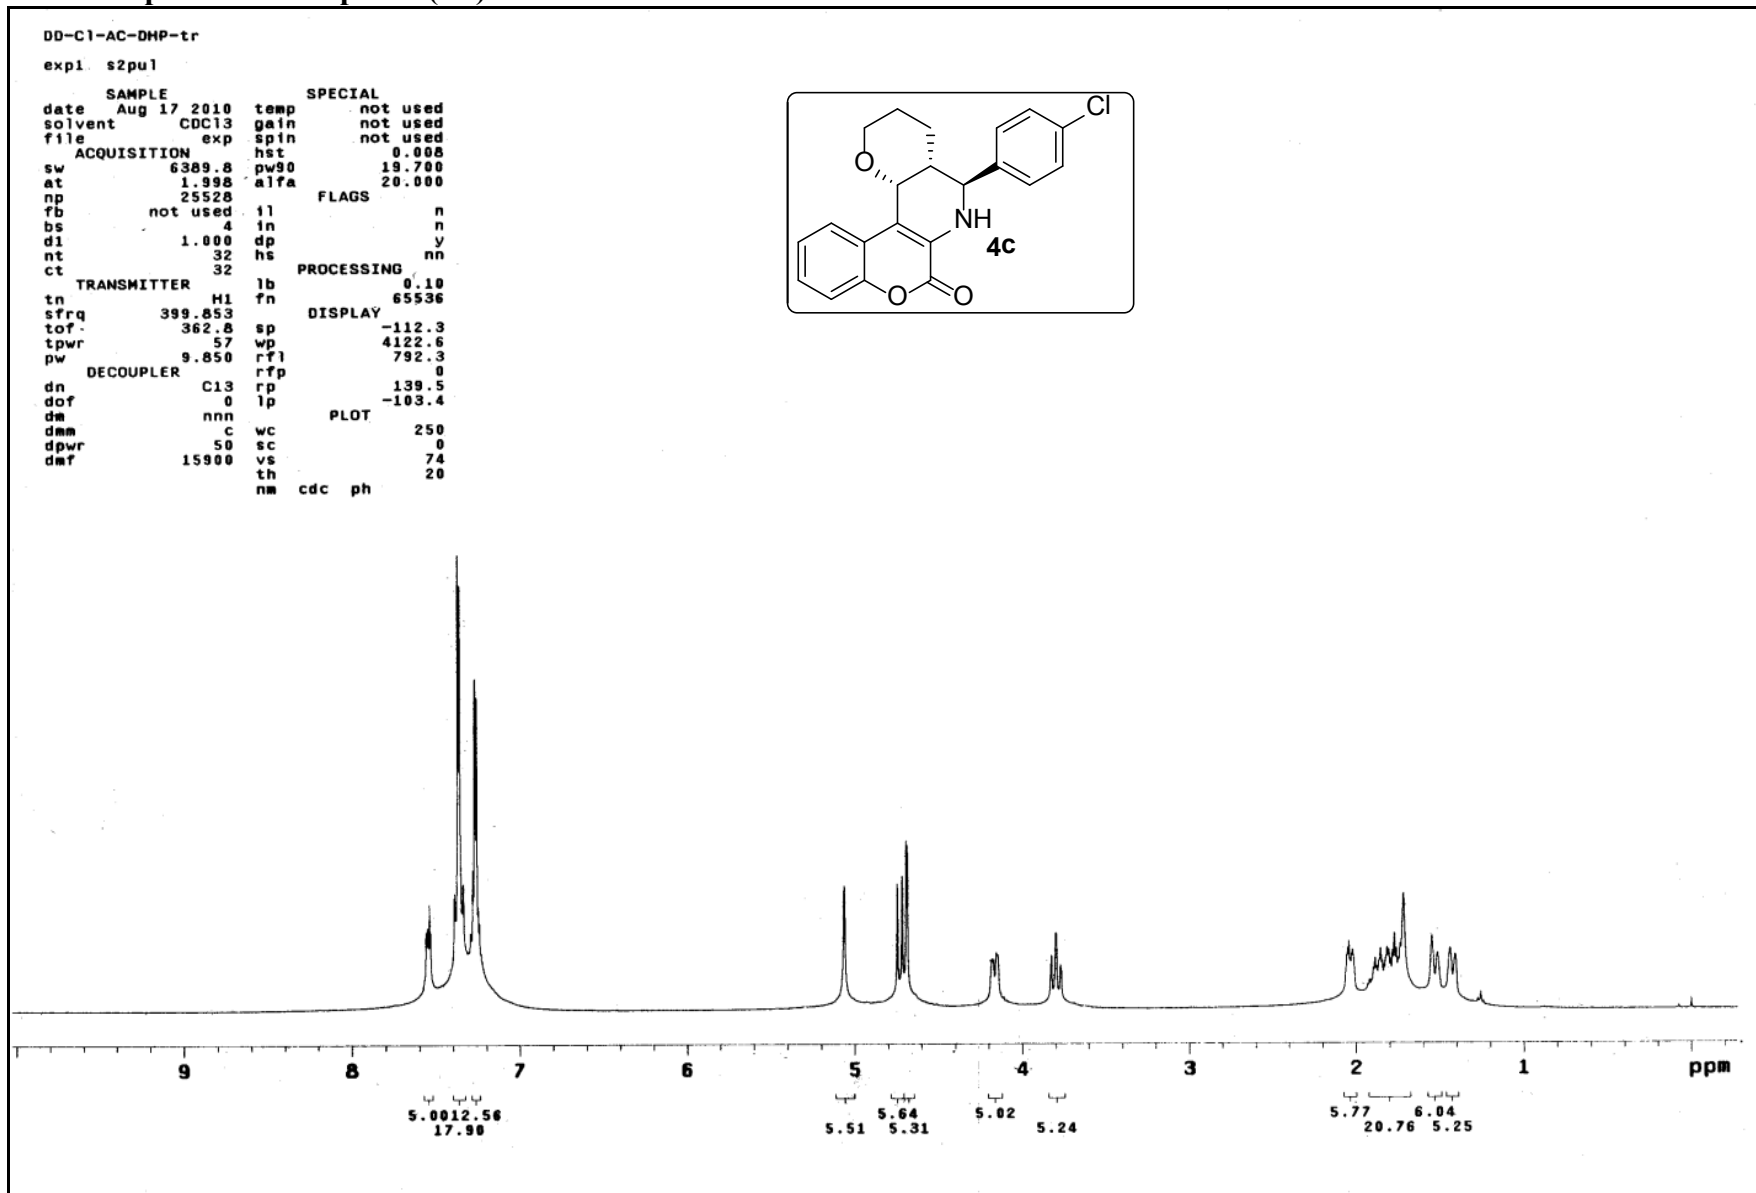

### 13 CNMR of Compound (4c)

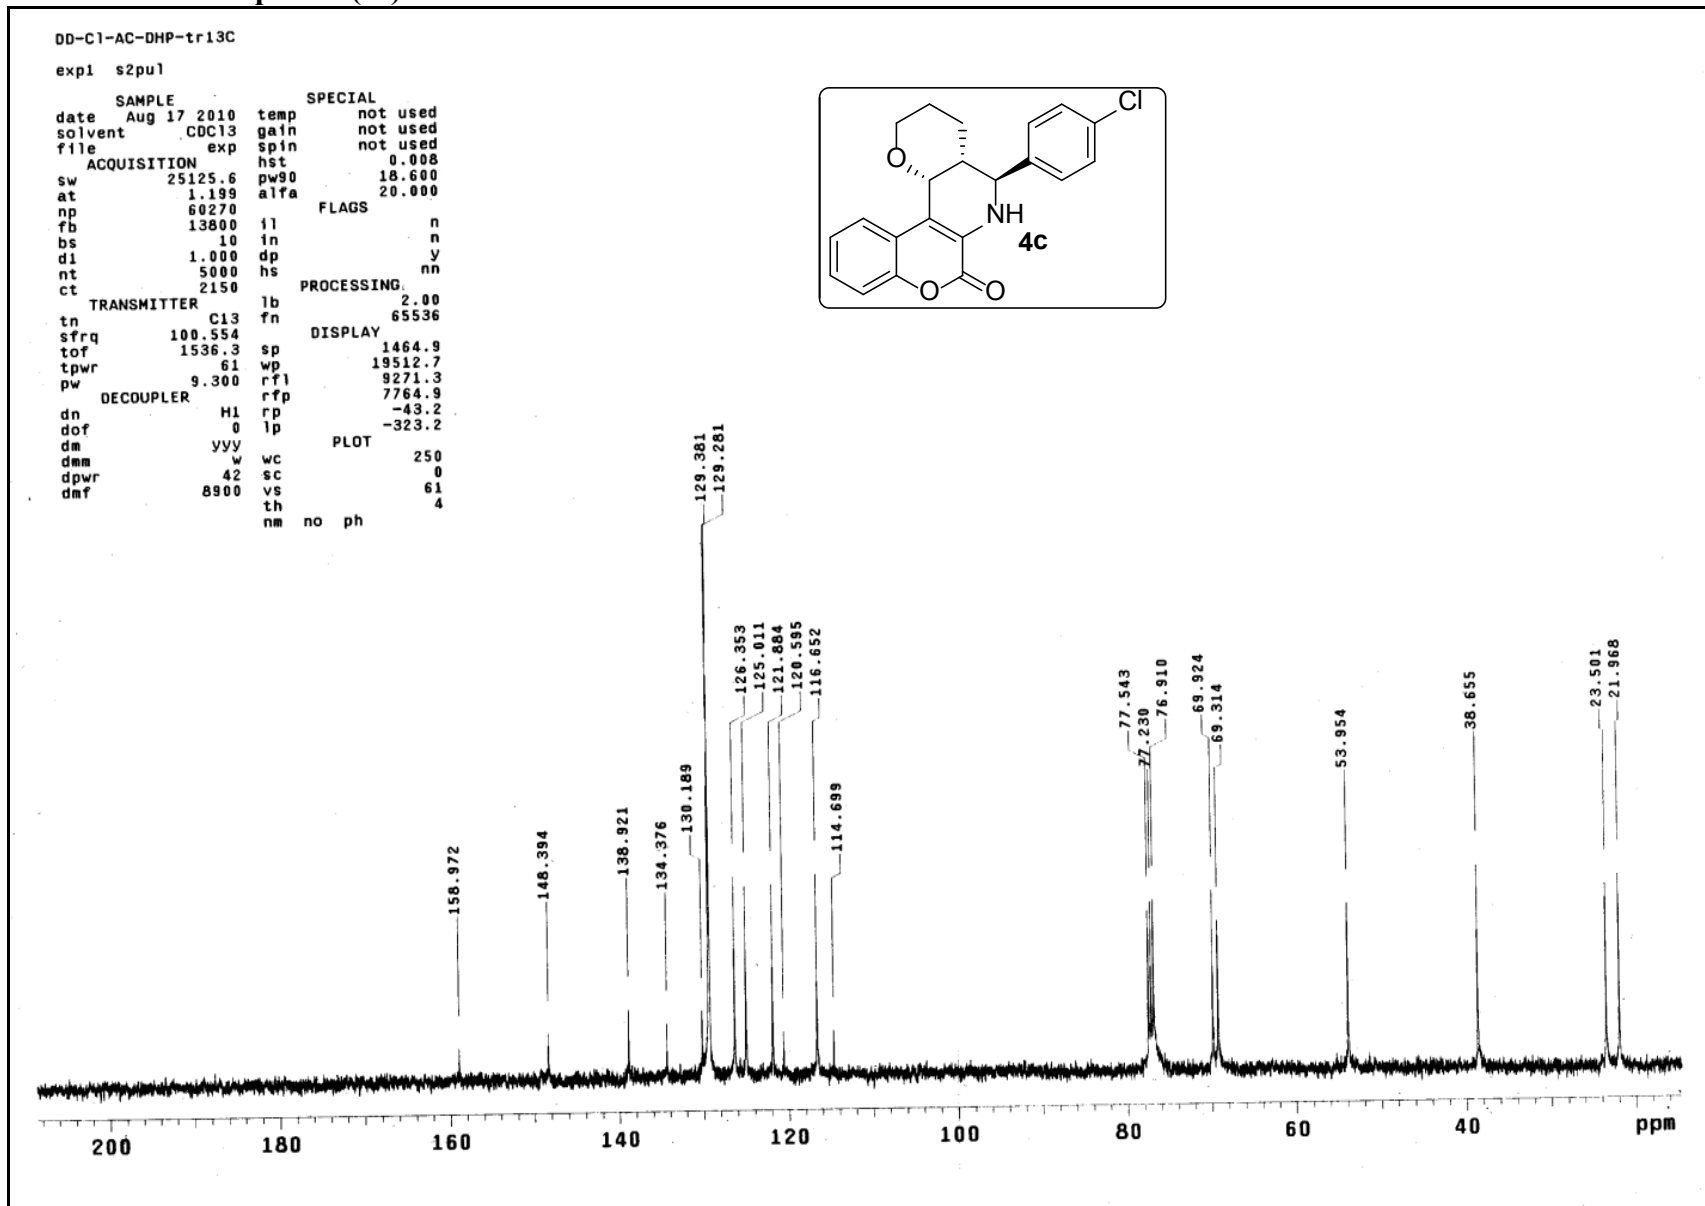

### <sup>1</sup>H NMR Spectra of Compound (5c)

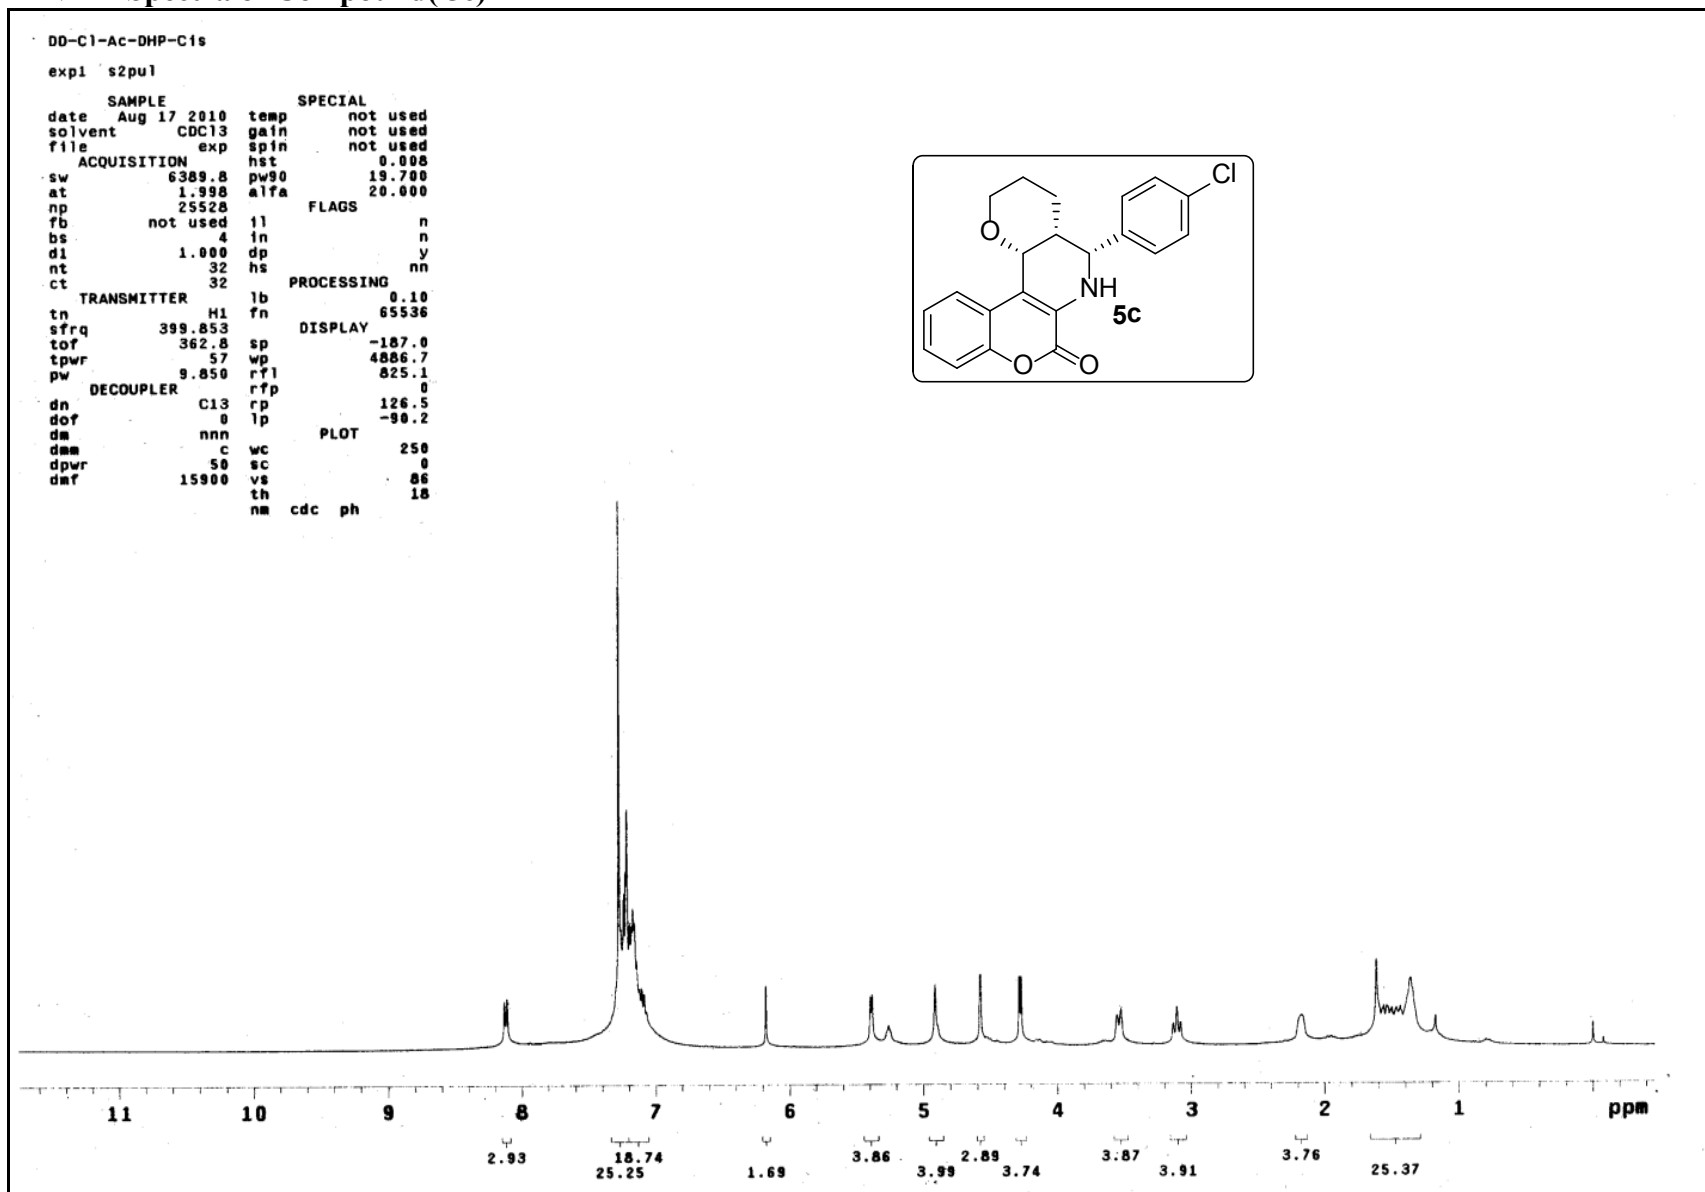

### Expansion <sup>1</sup>H NMR spectra for determining the trans : cis ratio for Compound (d)

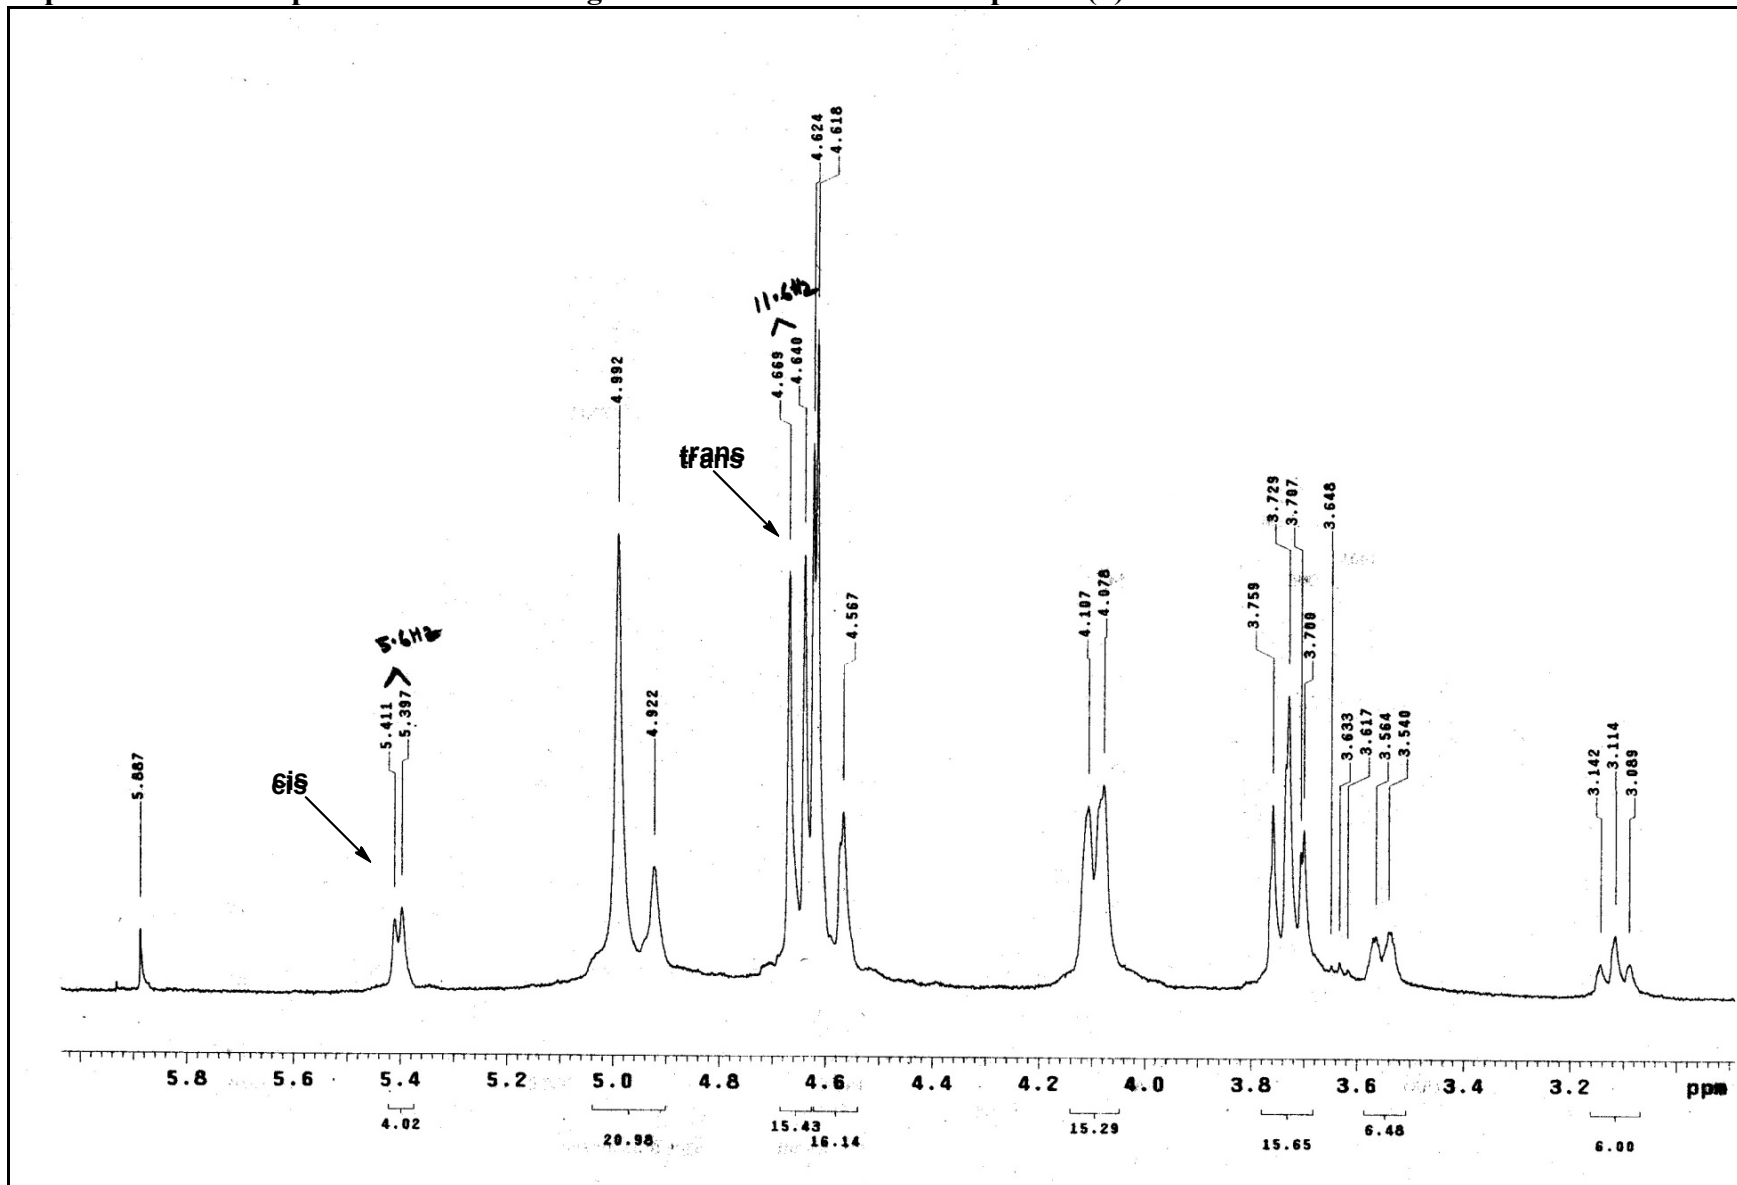



### <sup>1</sup>H NMR Spectra of Compound (4d)

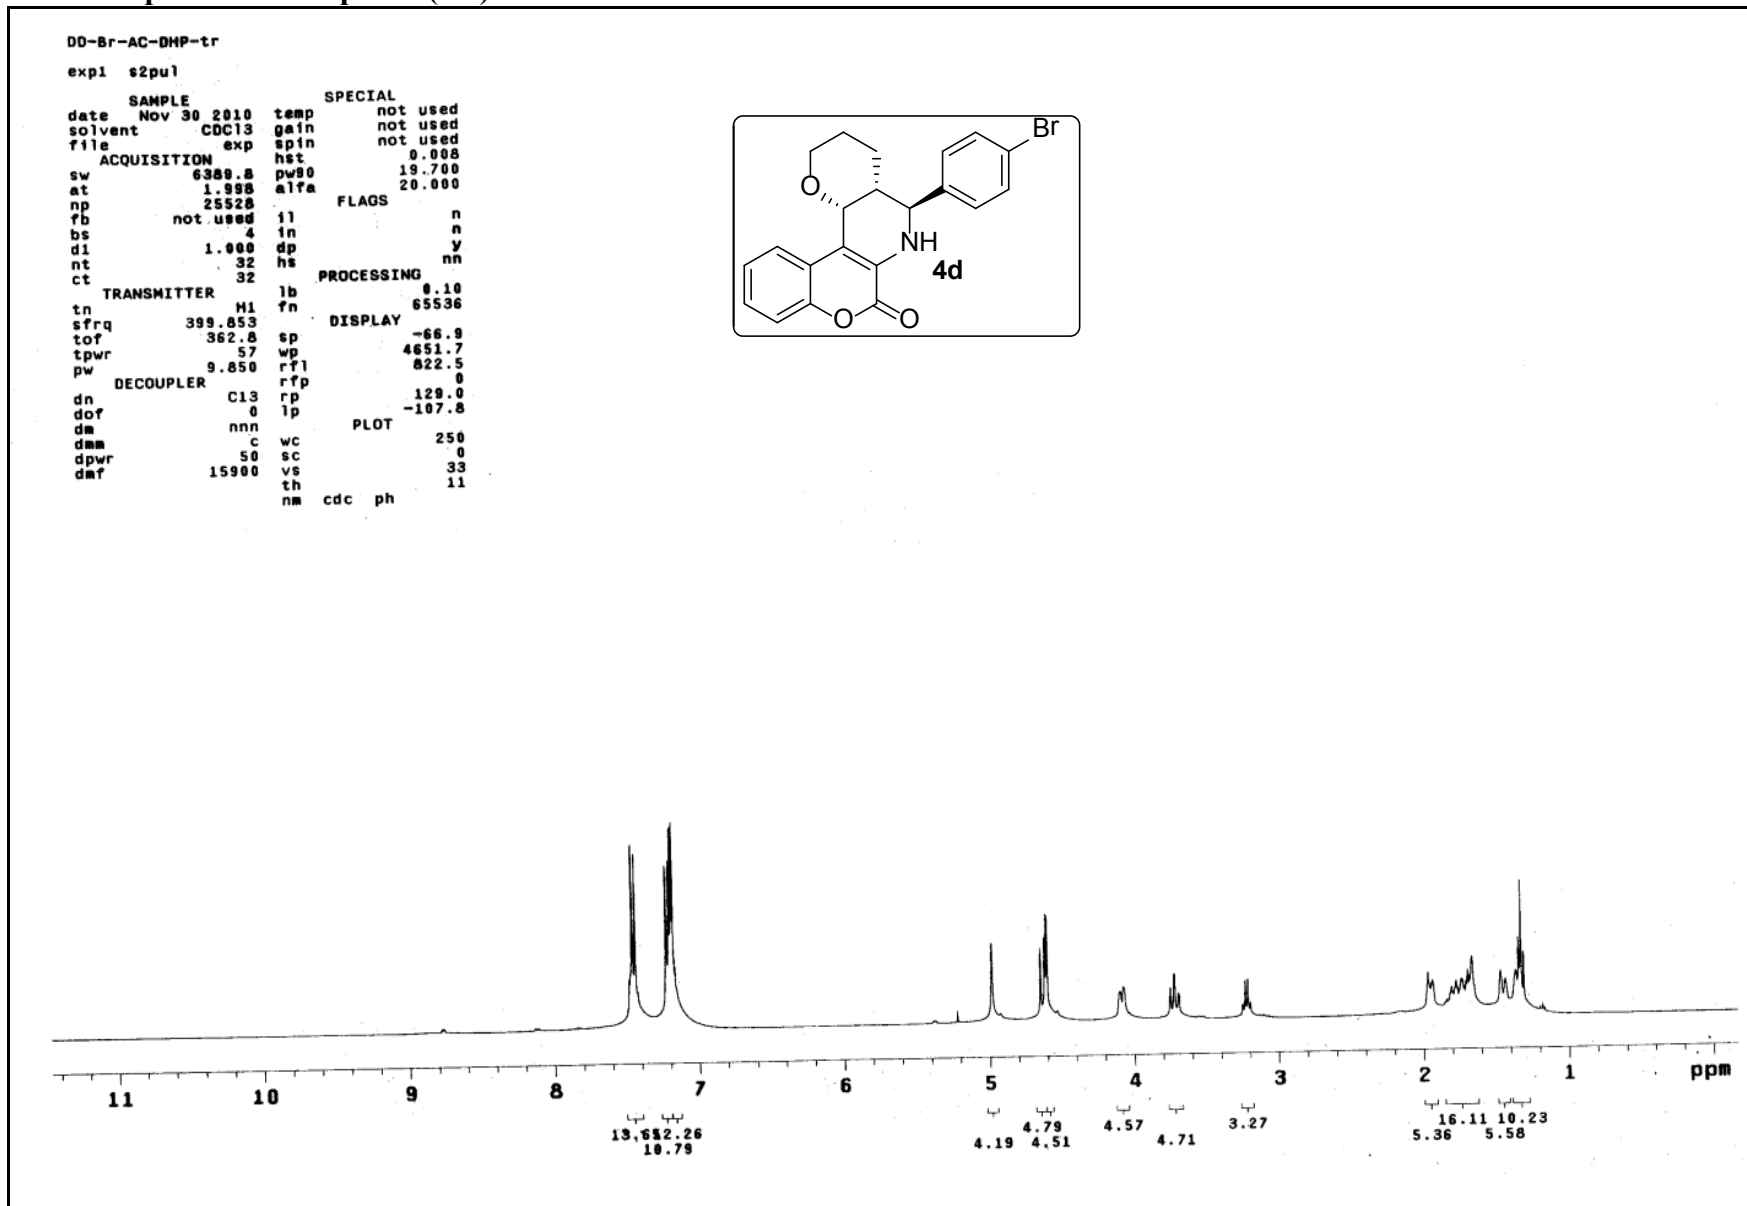

### 13 CNMR of Compound (4d)

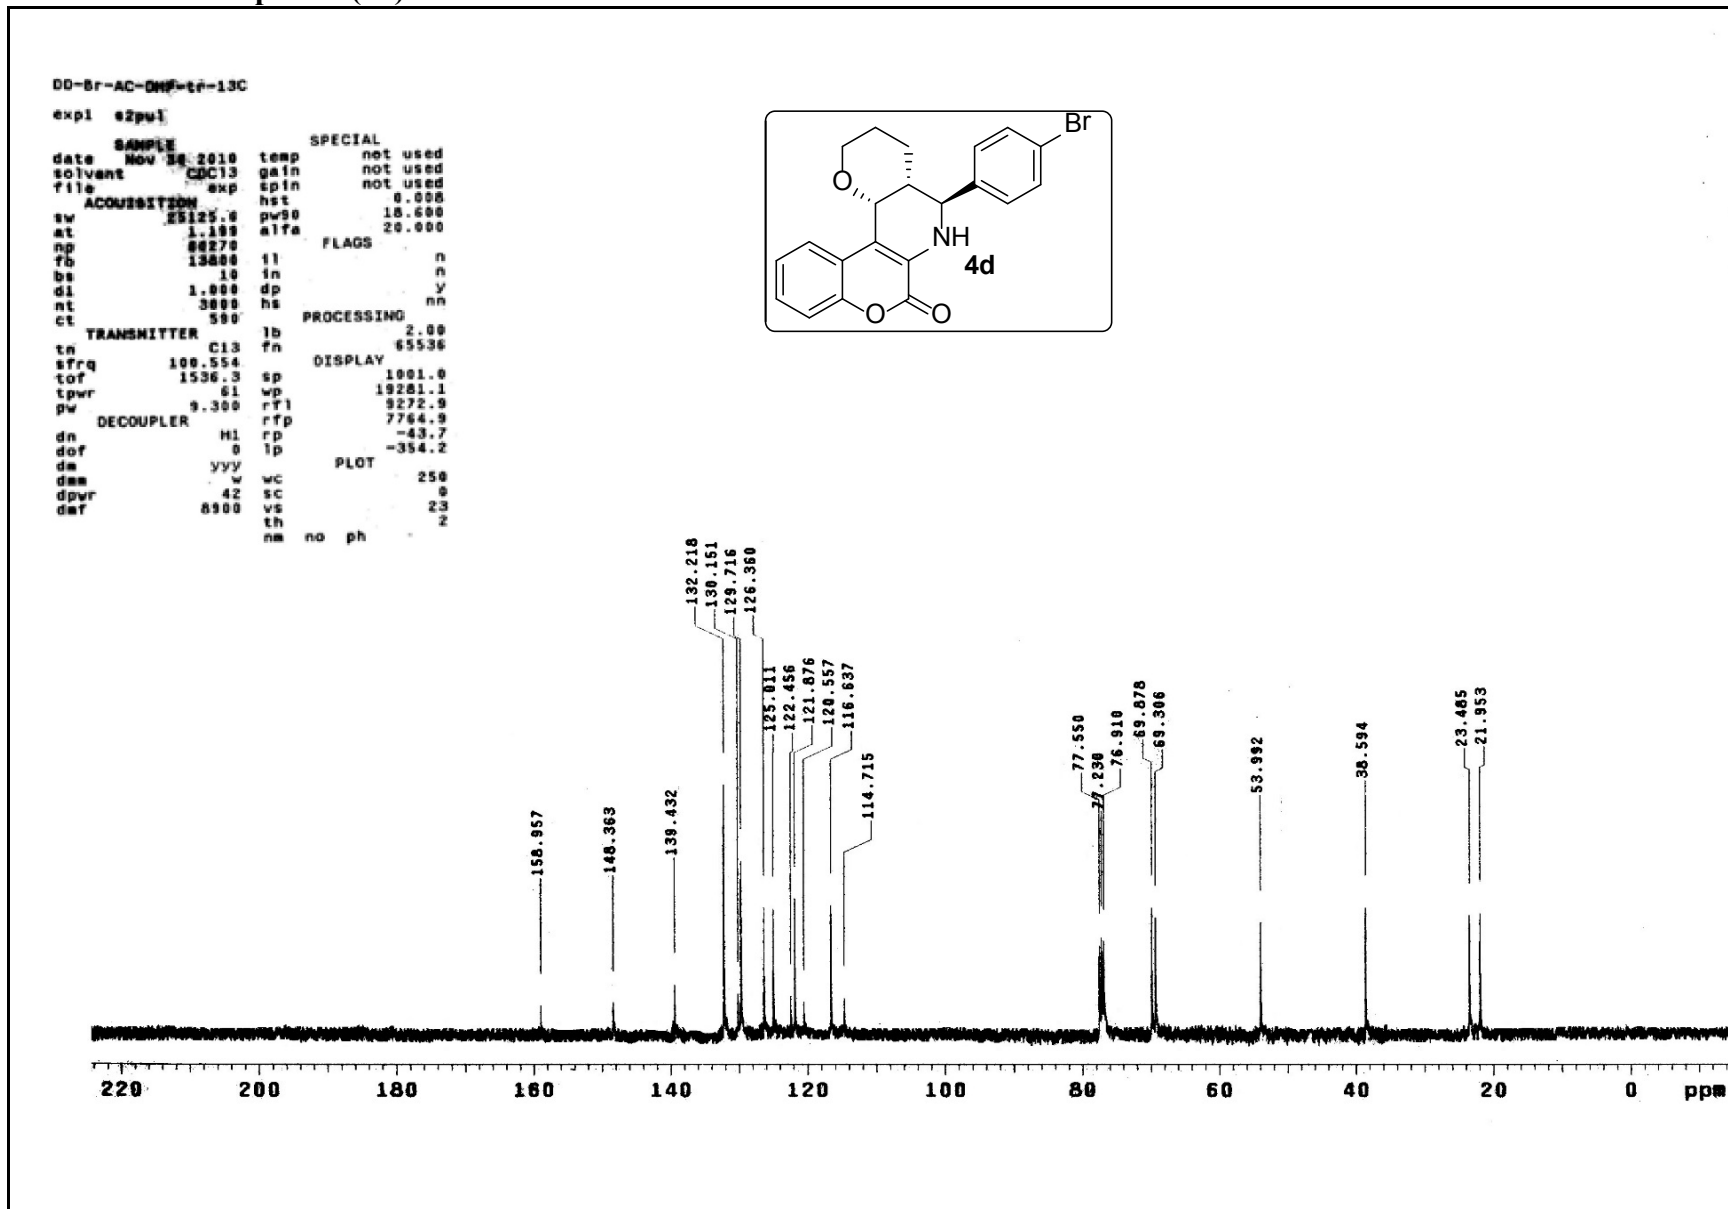

### <sup>1</sup>H NMR Spectra of Compound (5d)

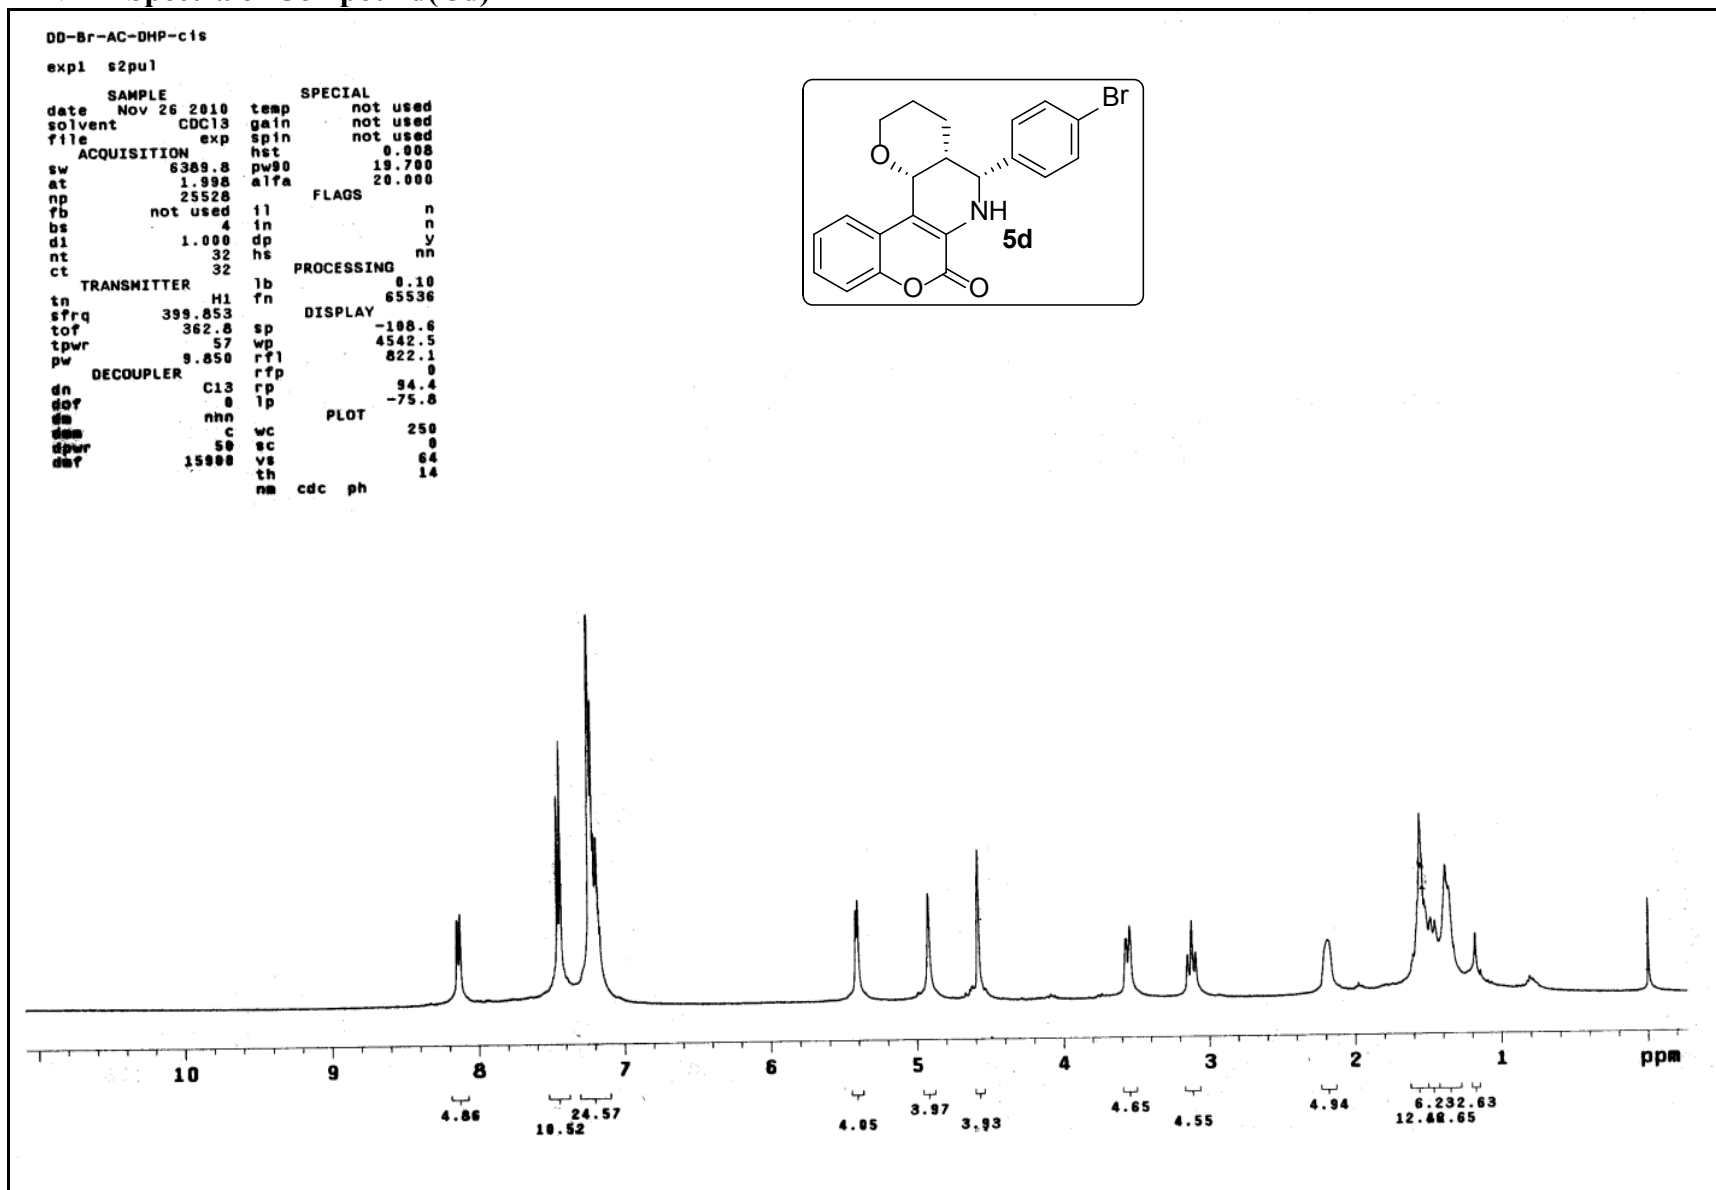

### <sup>13</sup>CNMR of Compound (5d)

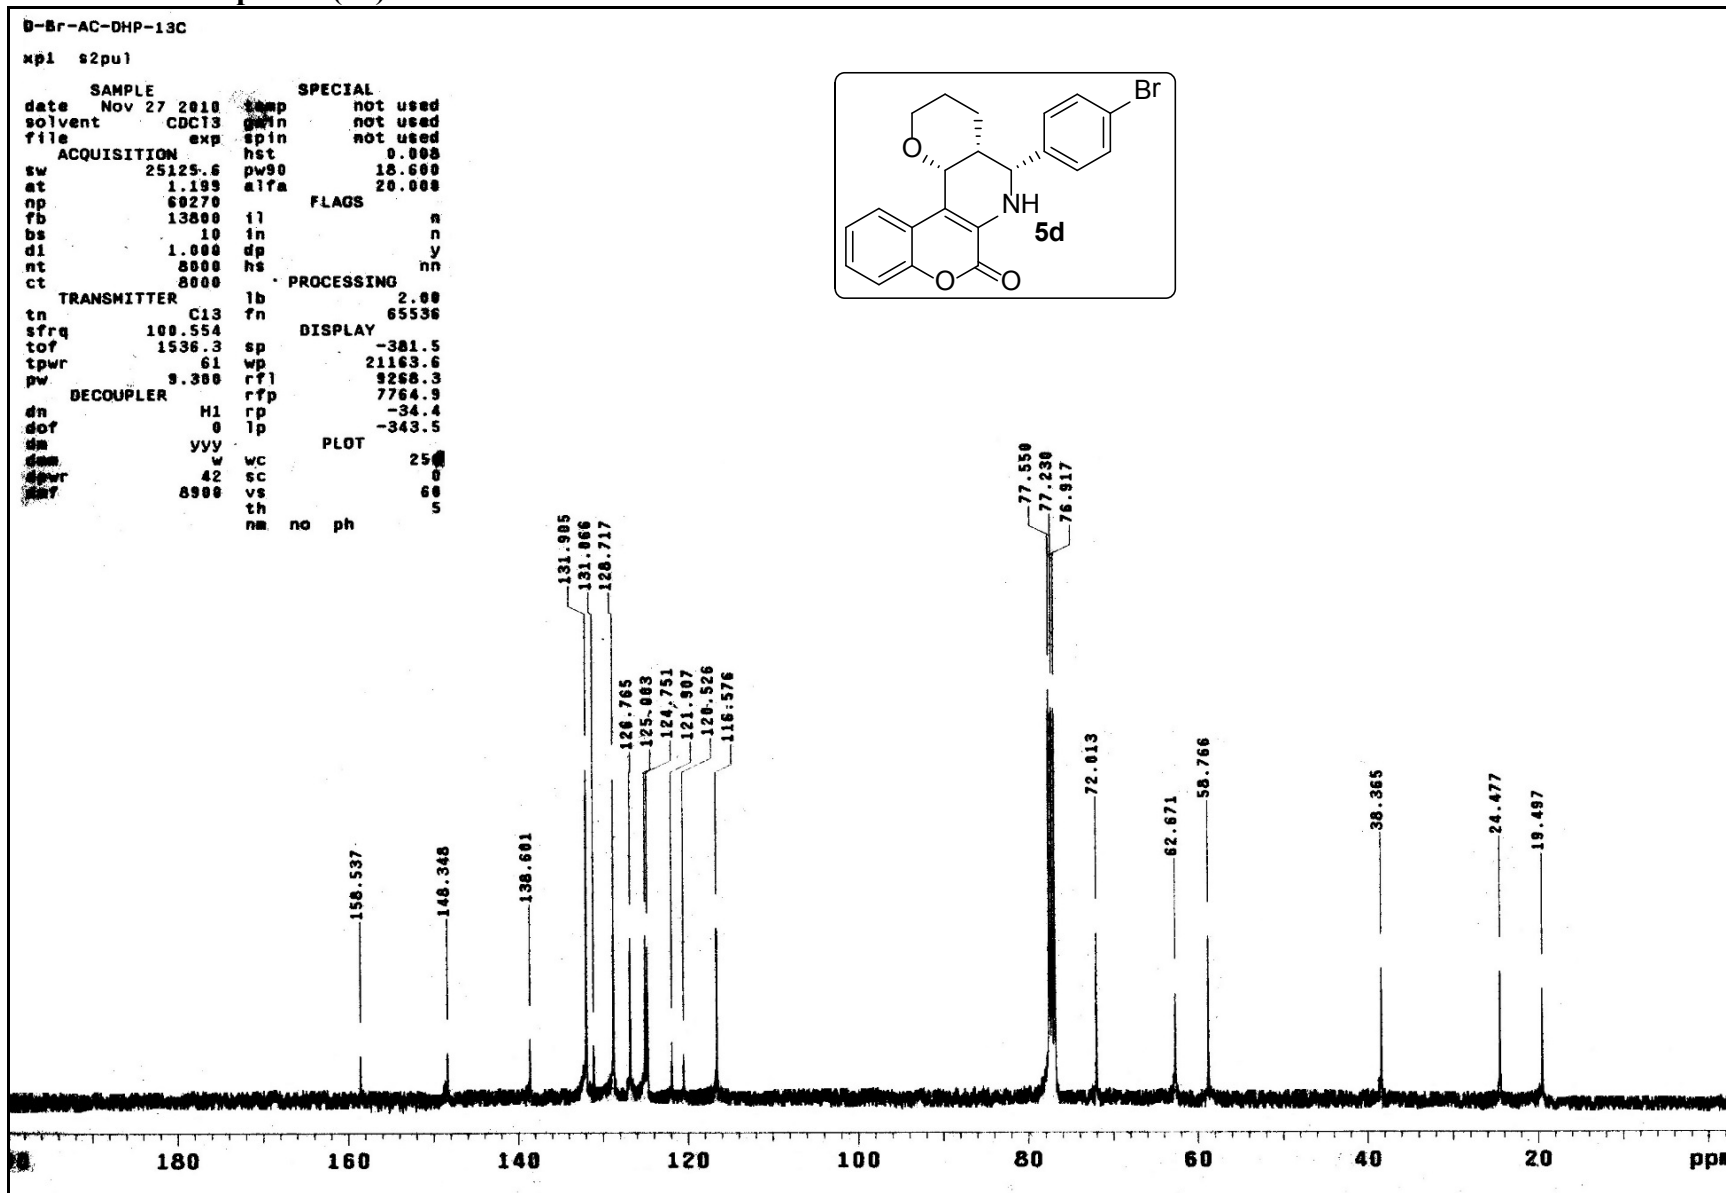

## HRMS of Compound (d)

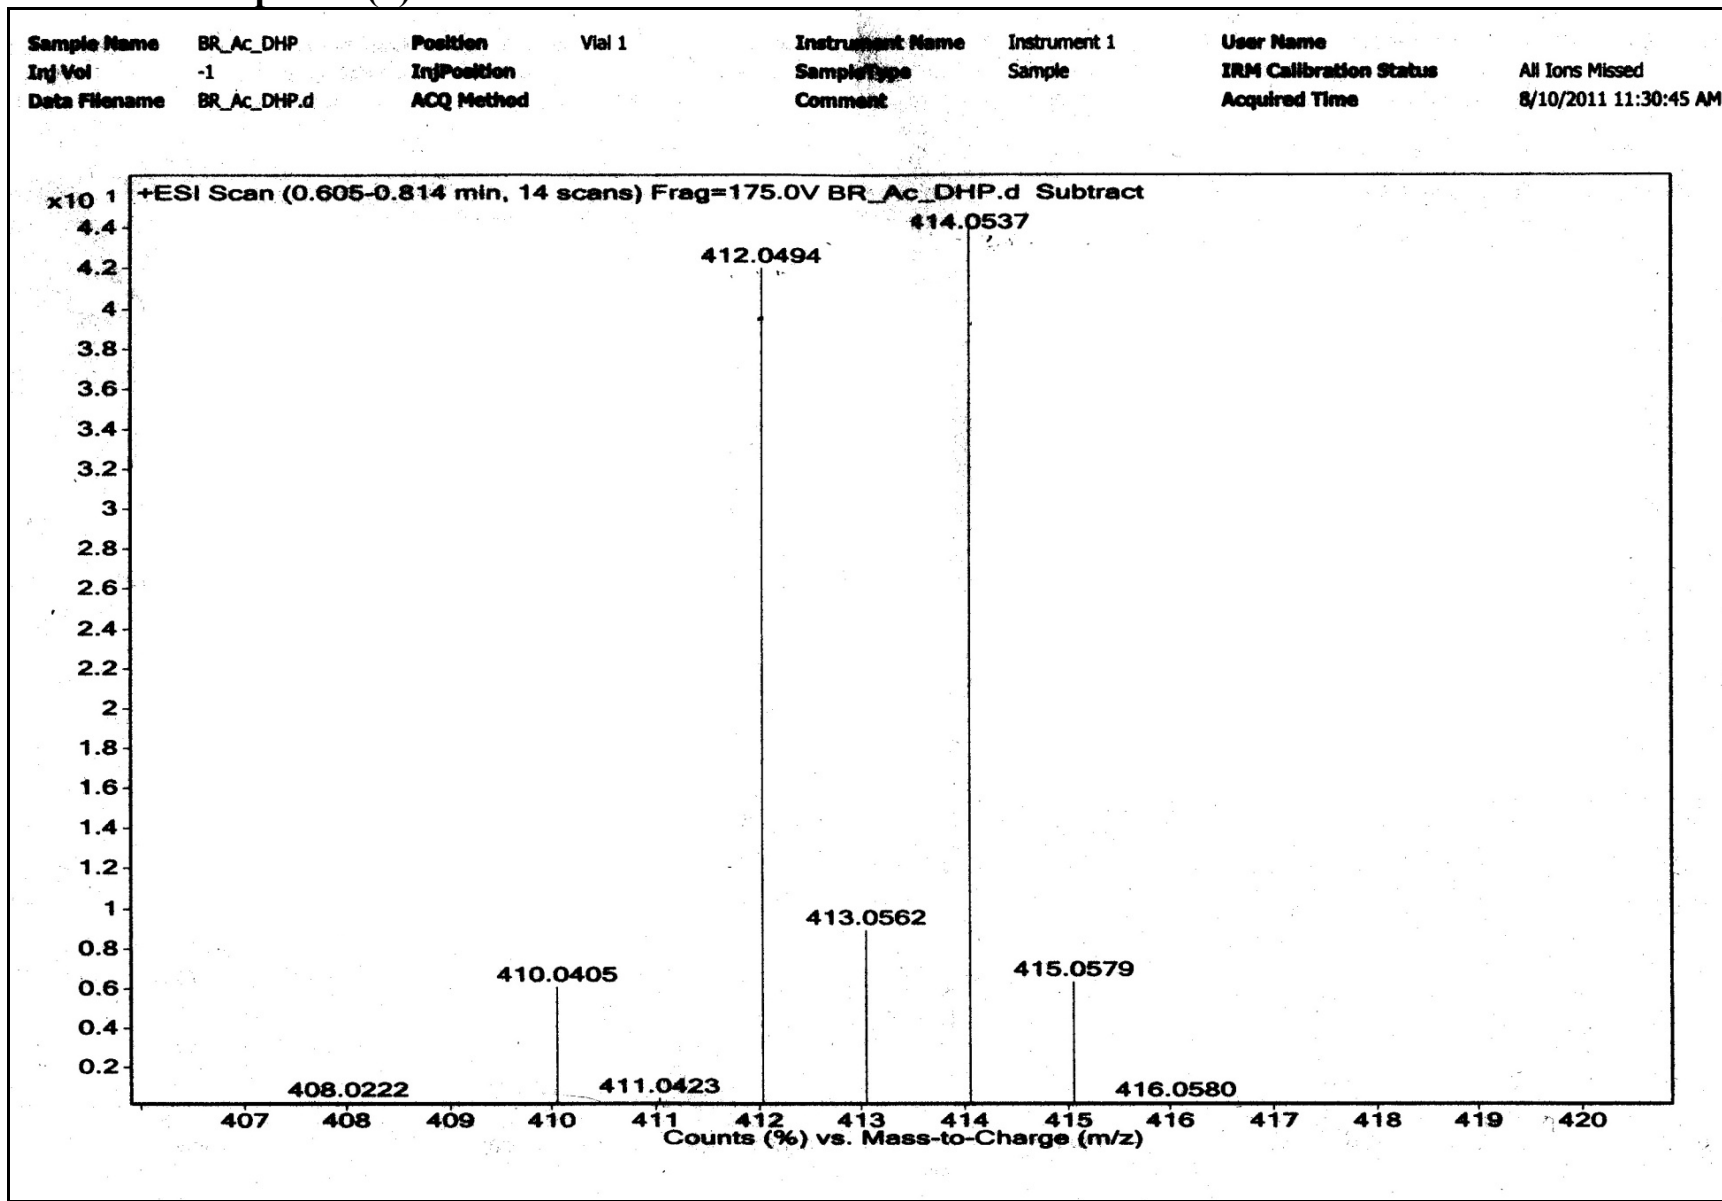

### Expansion <sup>1</sup>H NMR spectra for determining the trans : cis ratio for Compound (e)

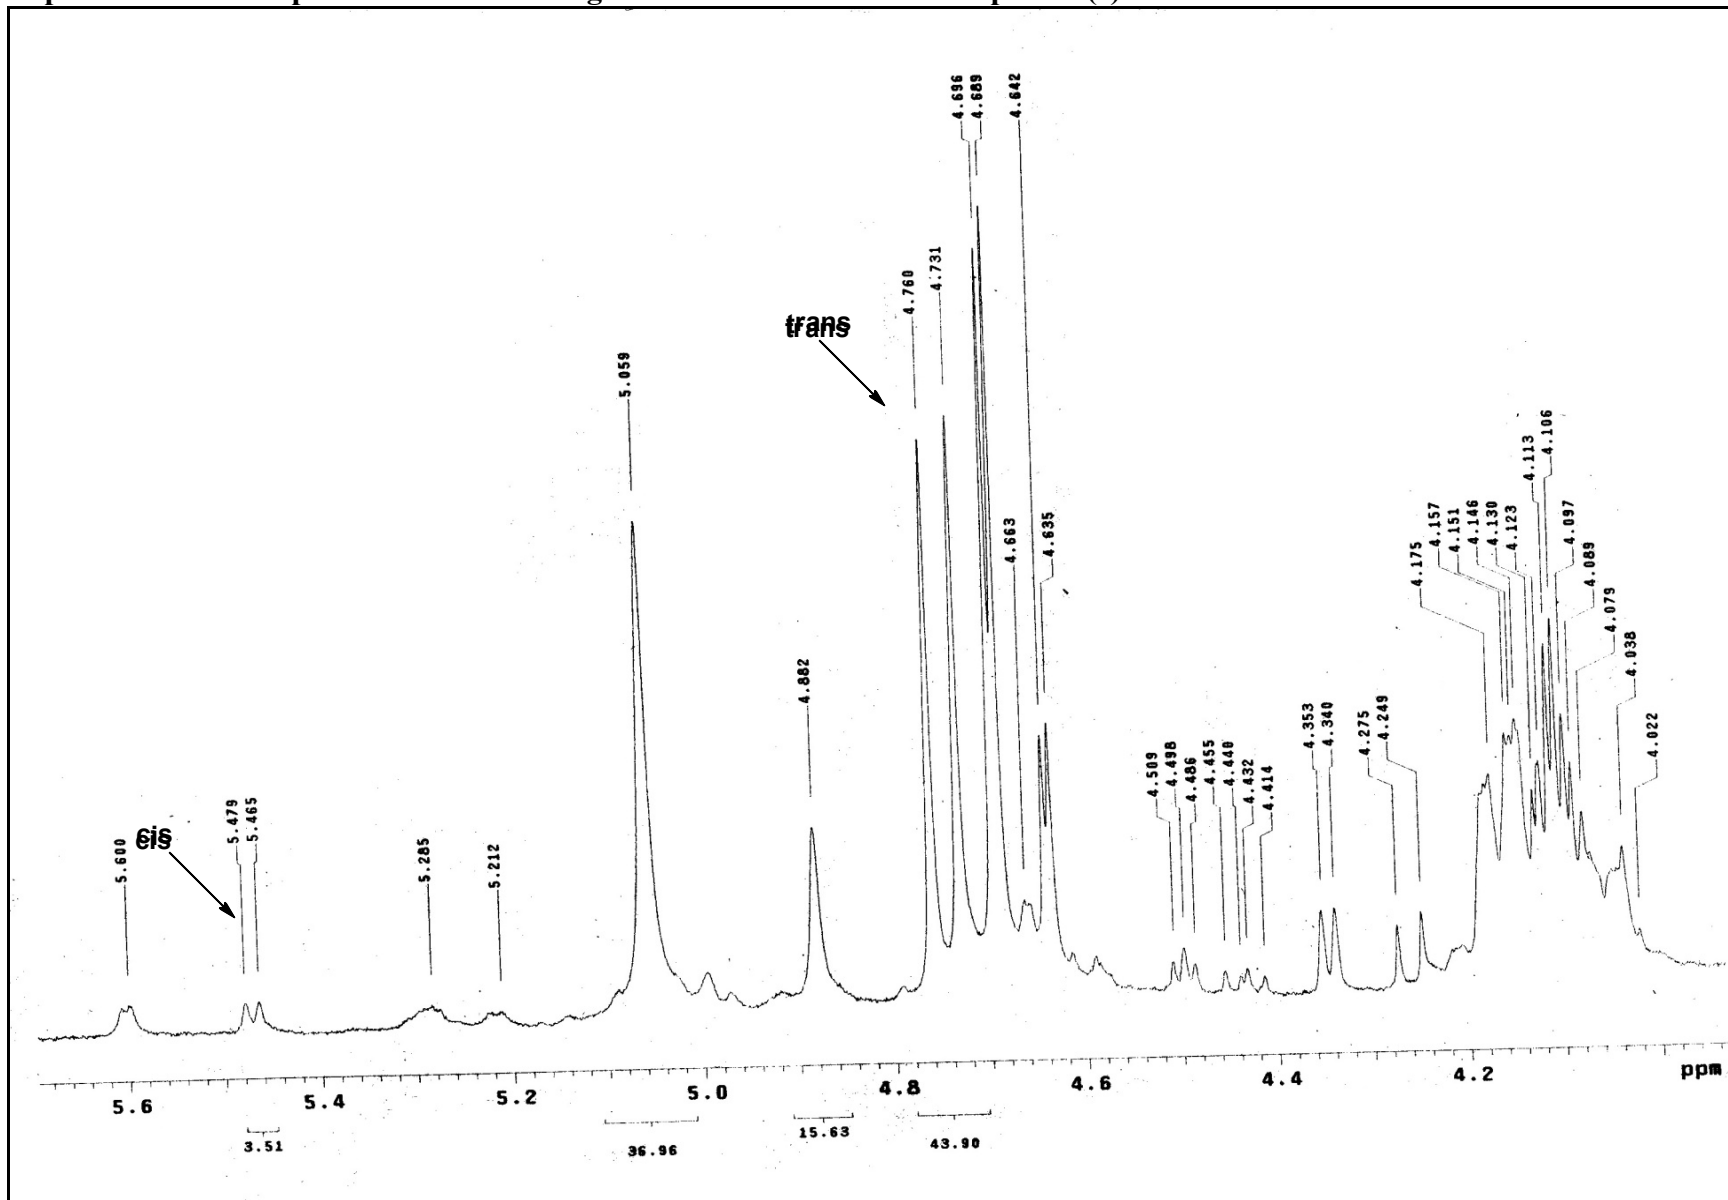

### <sup>1</sup>H NMR Spectra of Compound (4e)

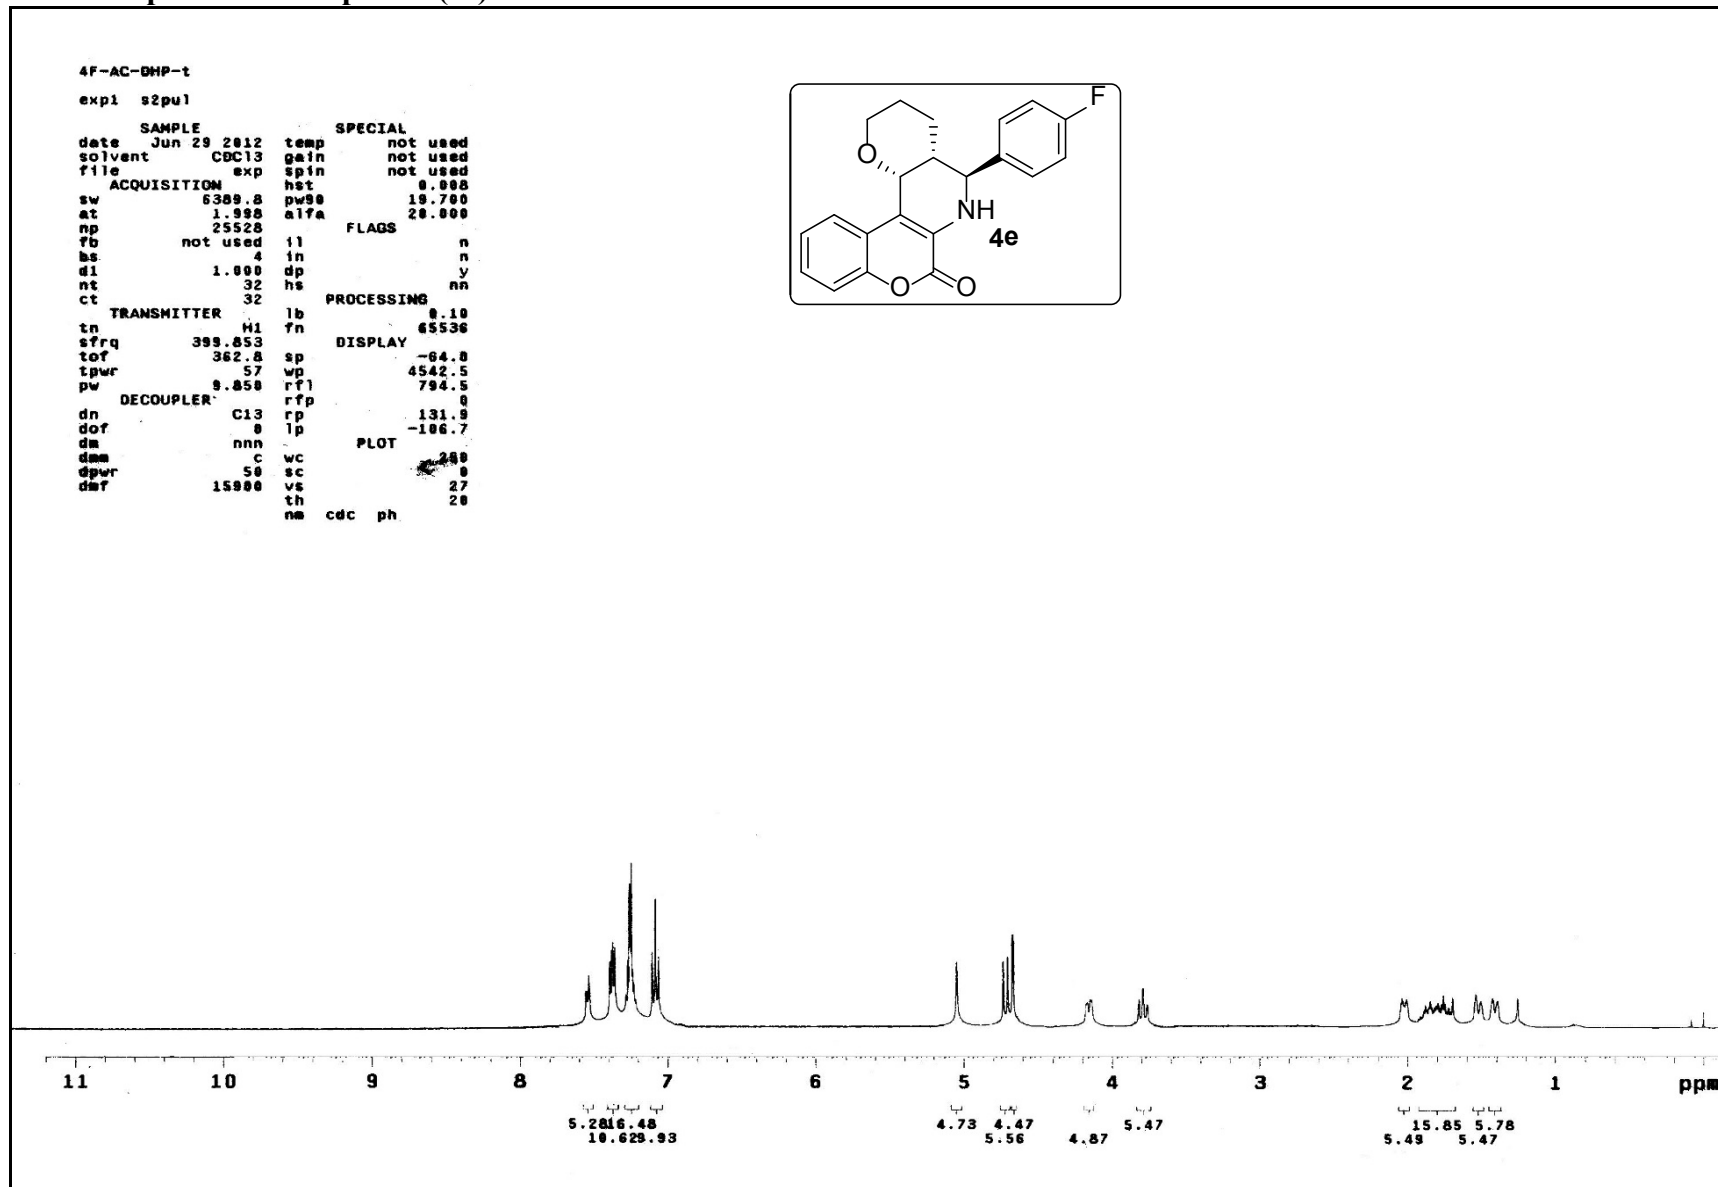

### <sup>13</sup>CNMR of Compound (4e)

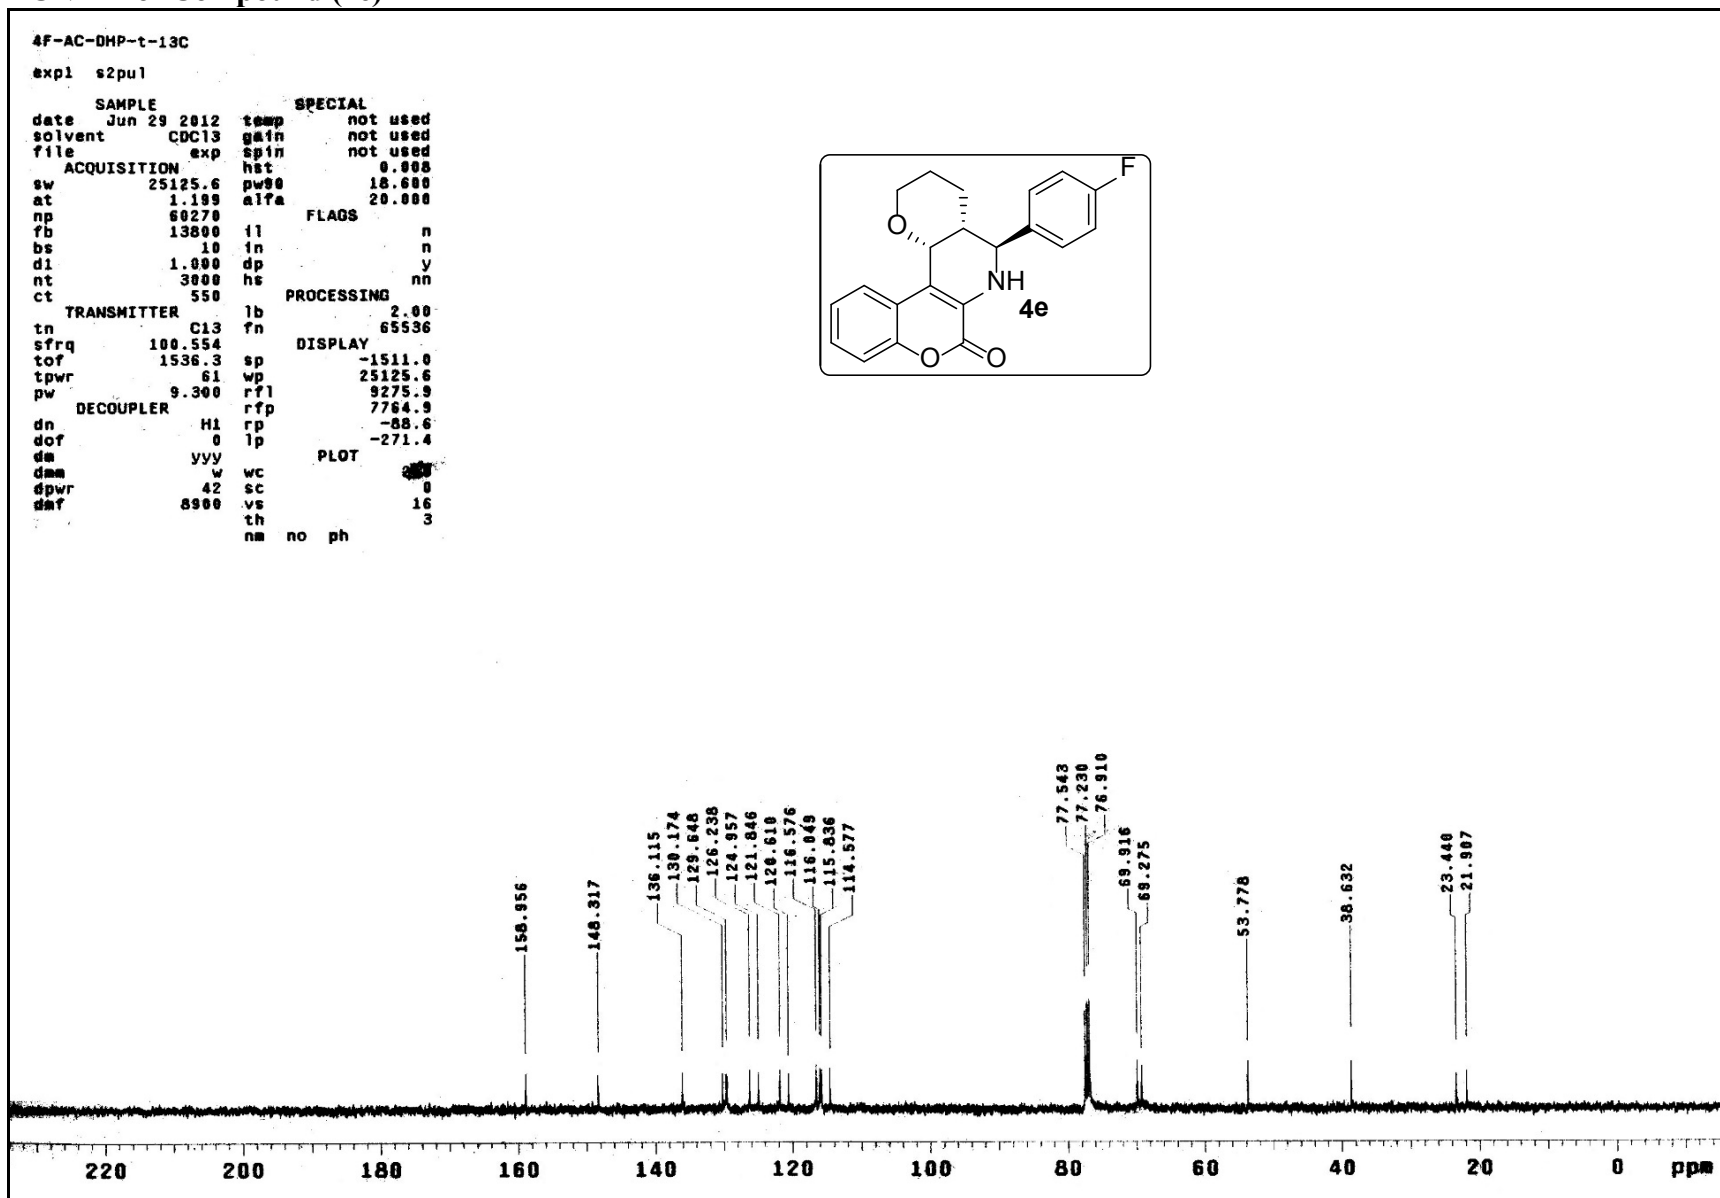



### <sup>1</sup>HNMR Spectra of Compound (5e)

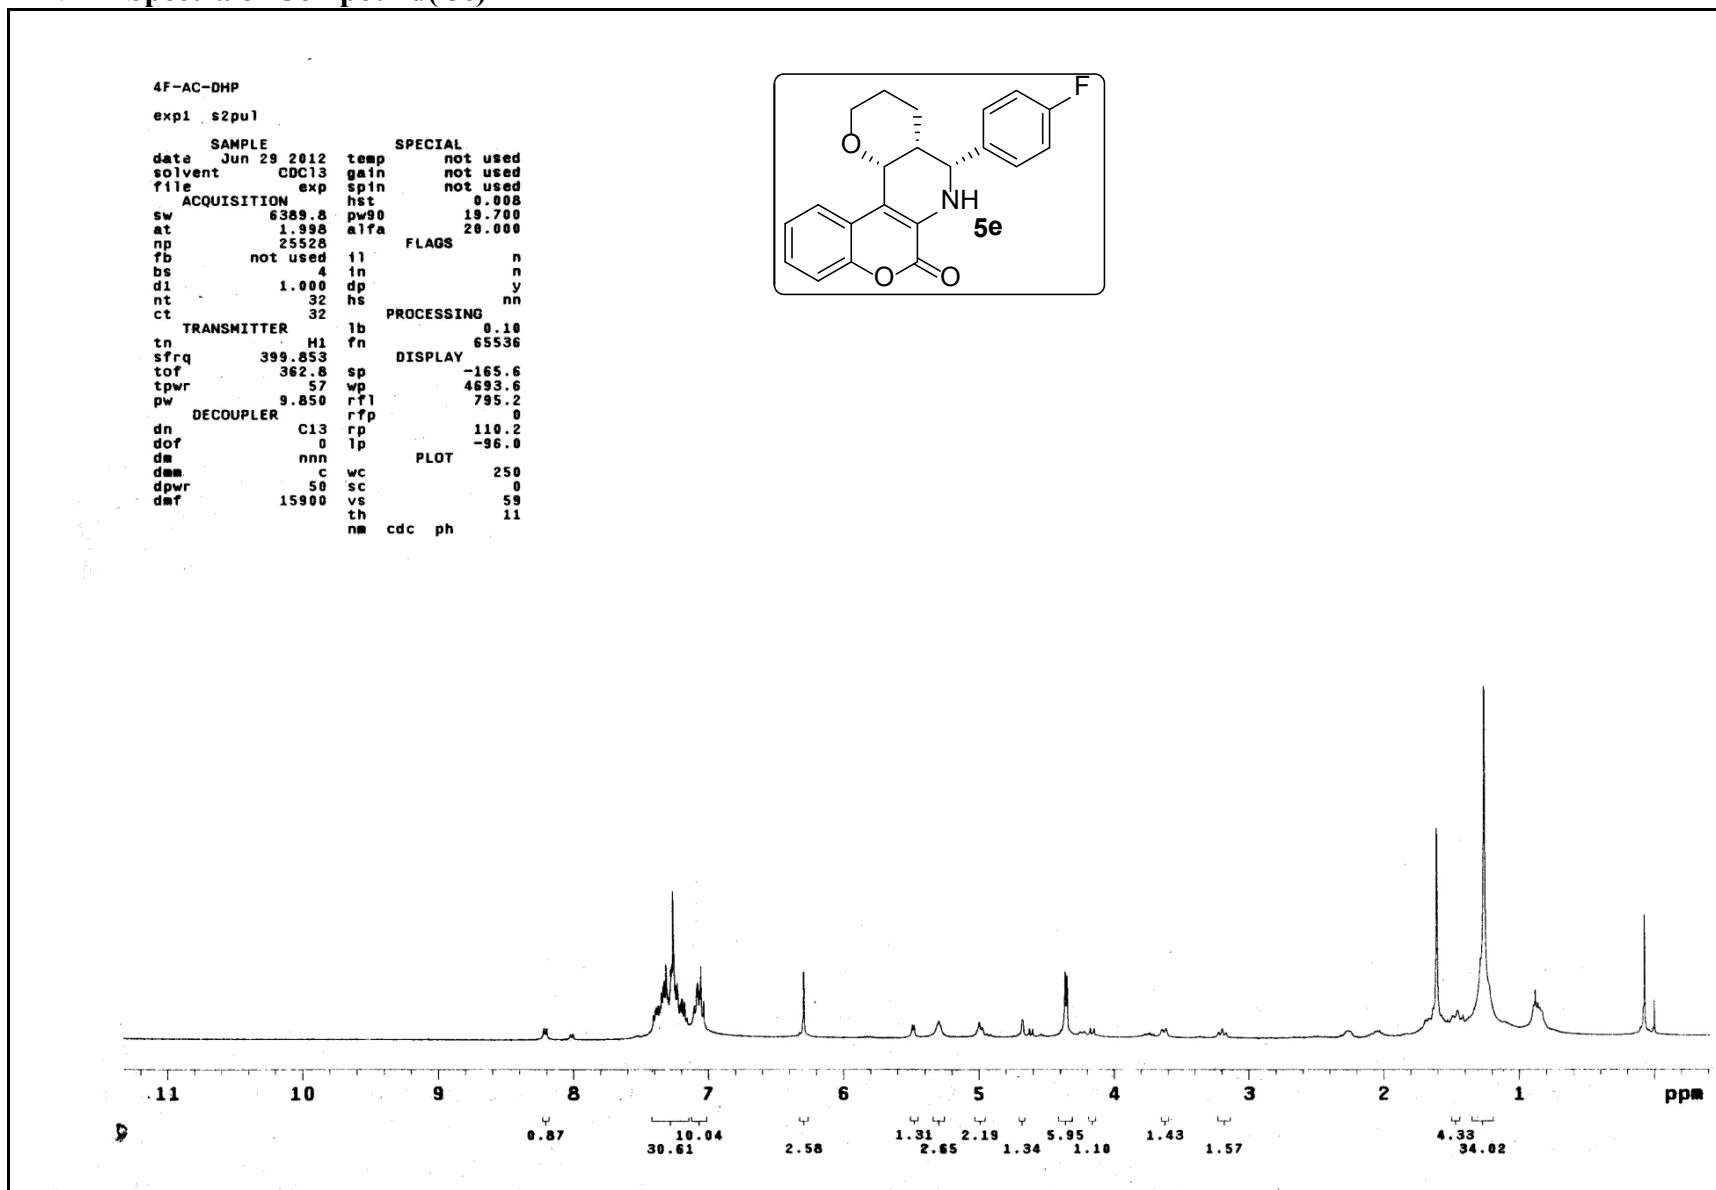

## HRMS of Compound (e)

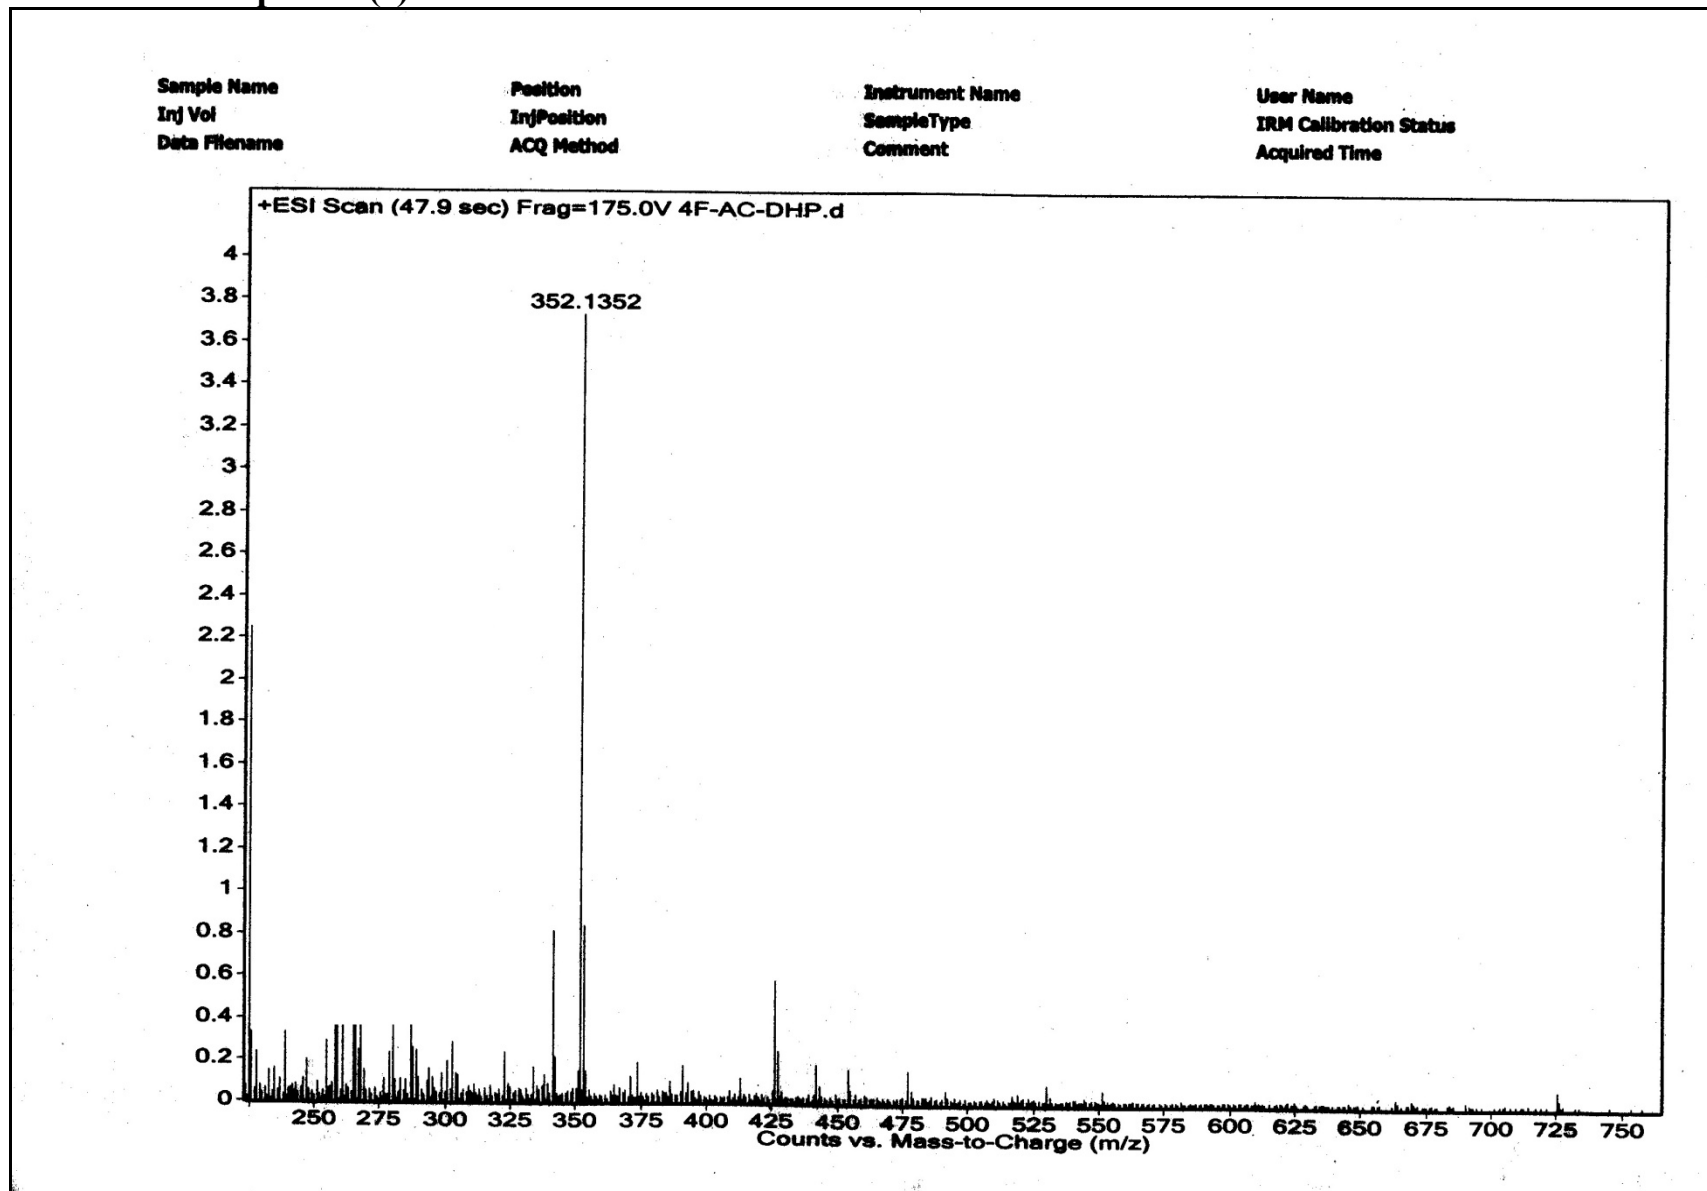

### Expansion <sup>1</sup>H NMR spectra for determining the trans : cis ratio for Compound (f)

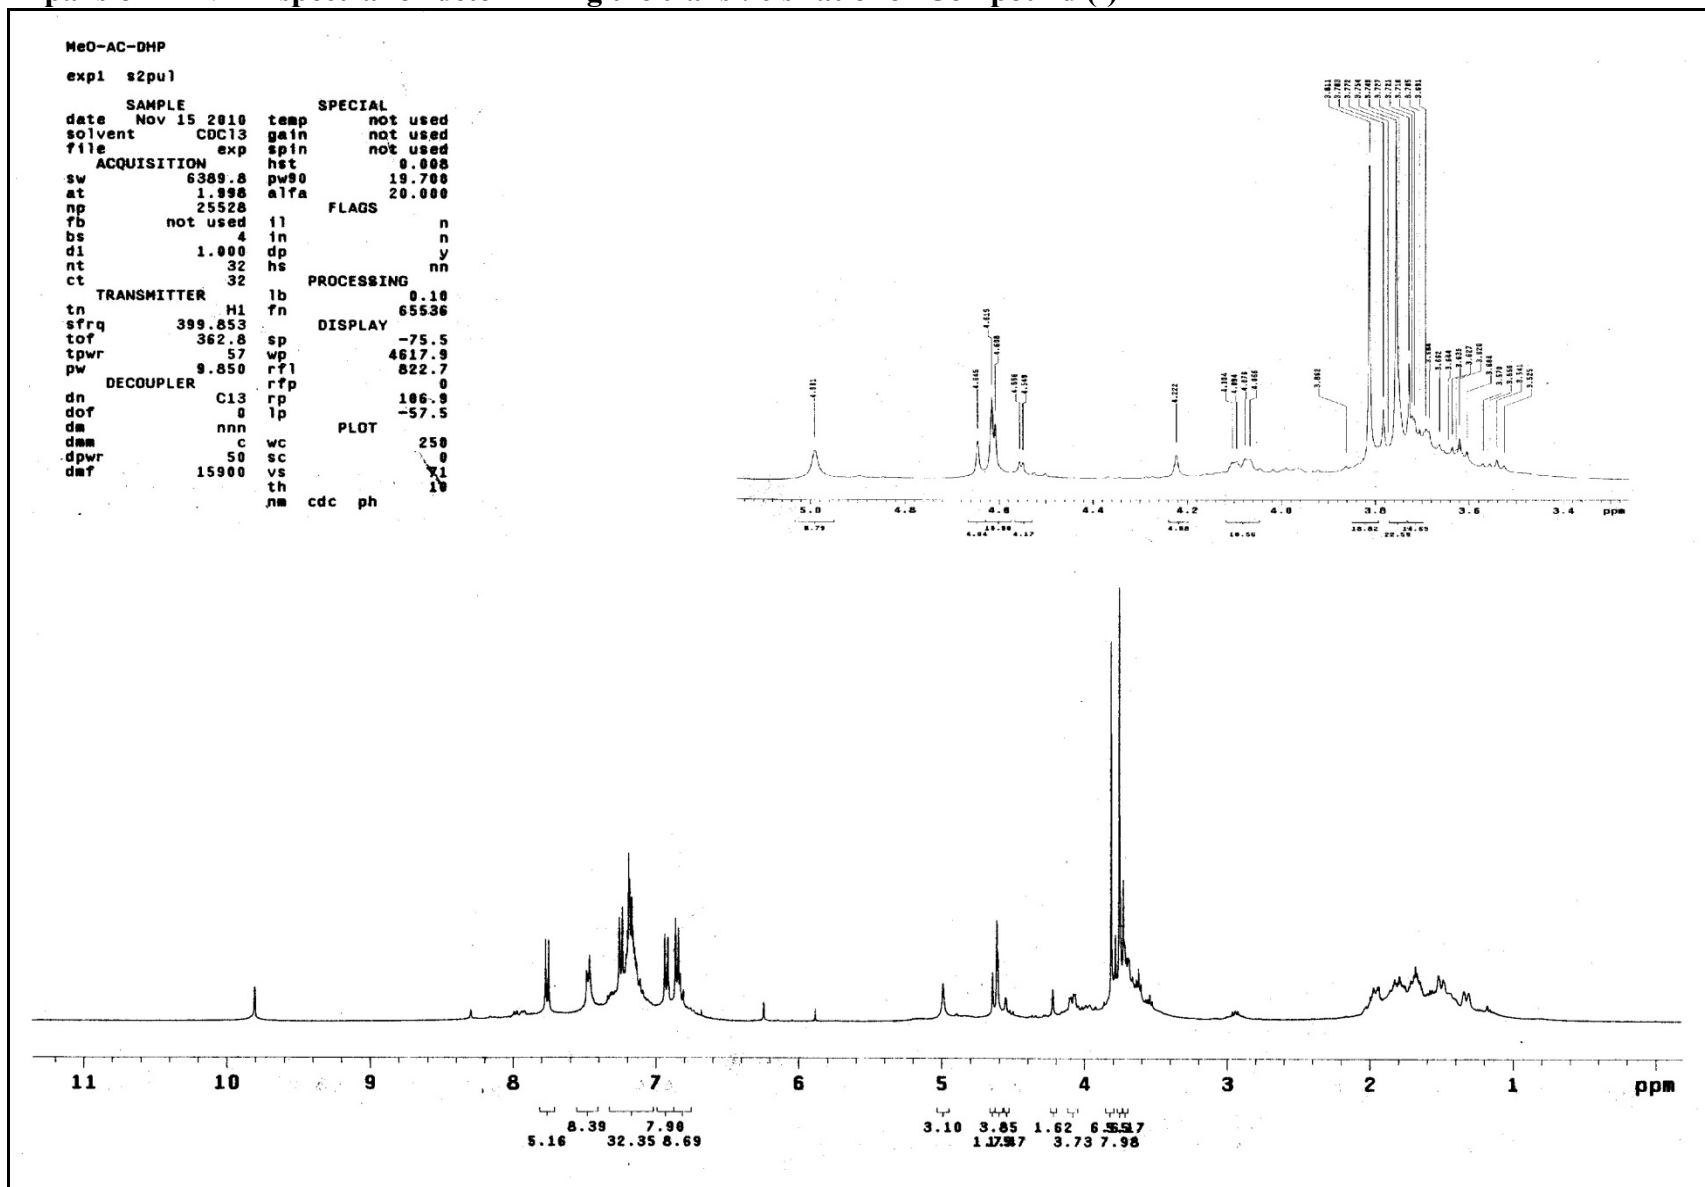

### <sup>1</sup>H NMR Spectra of Compound (4f)

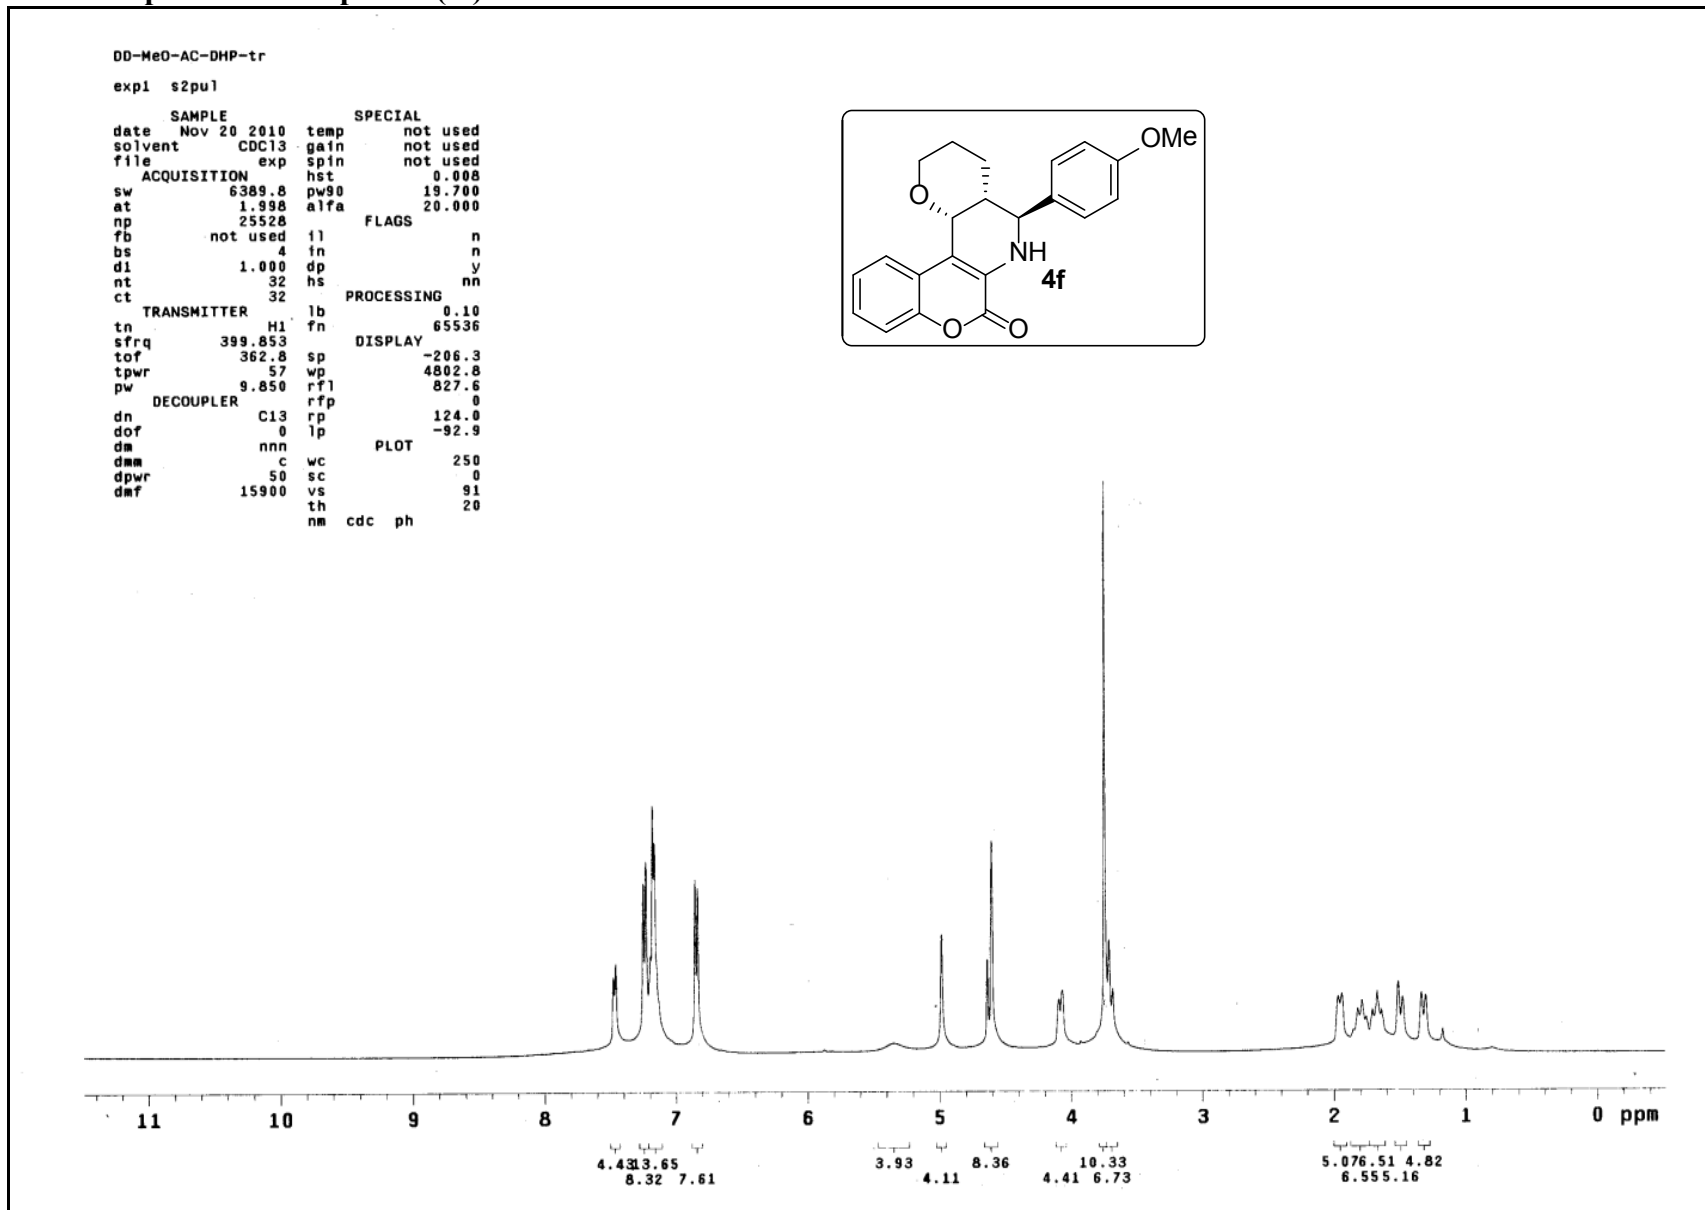

### <sup>13</sup>CNMR of Compound (4f)

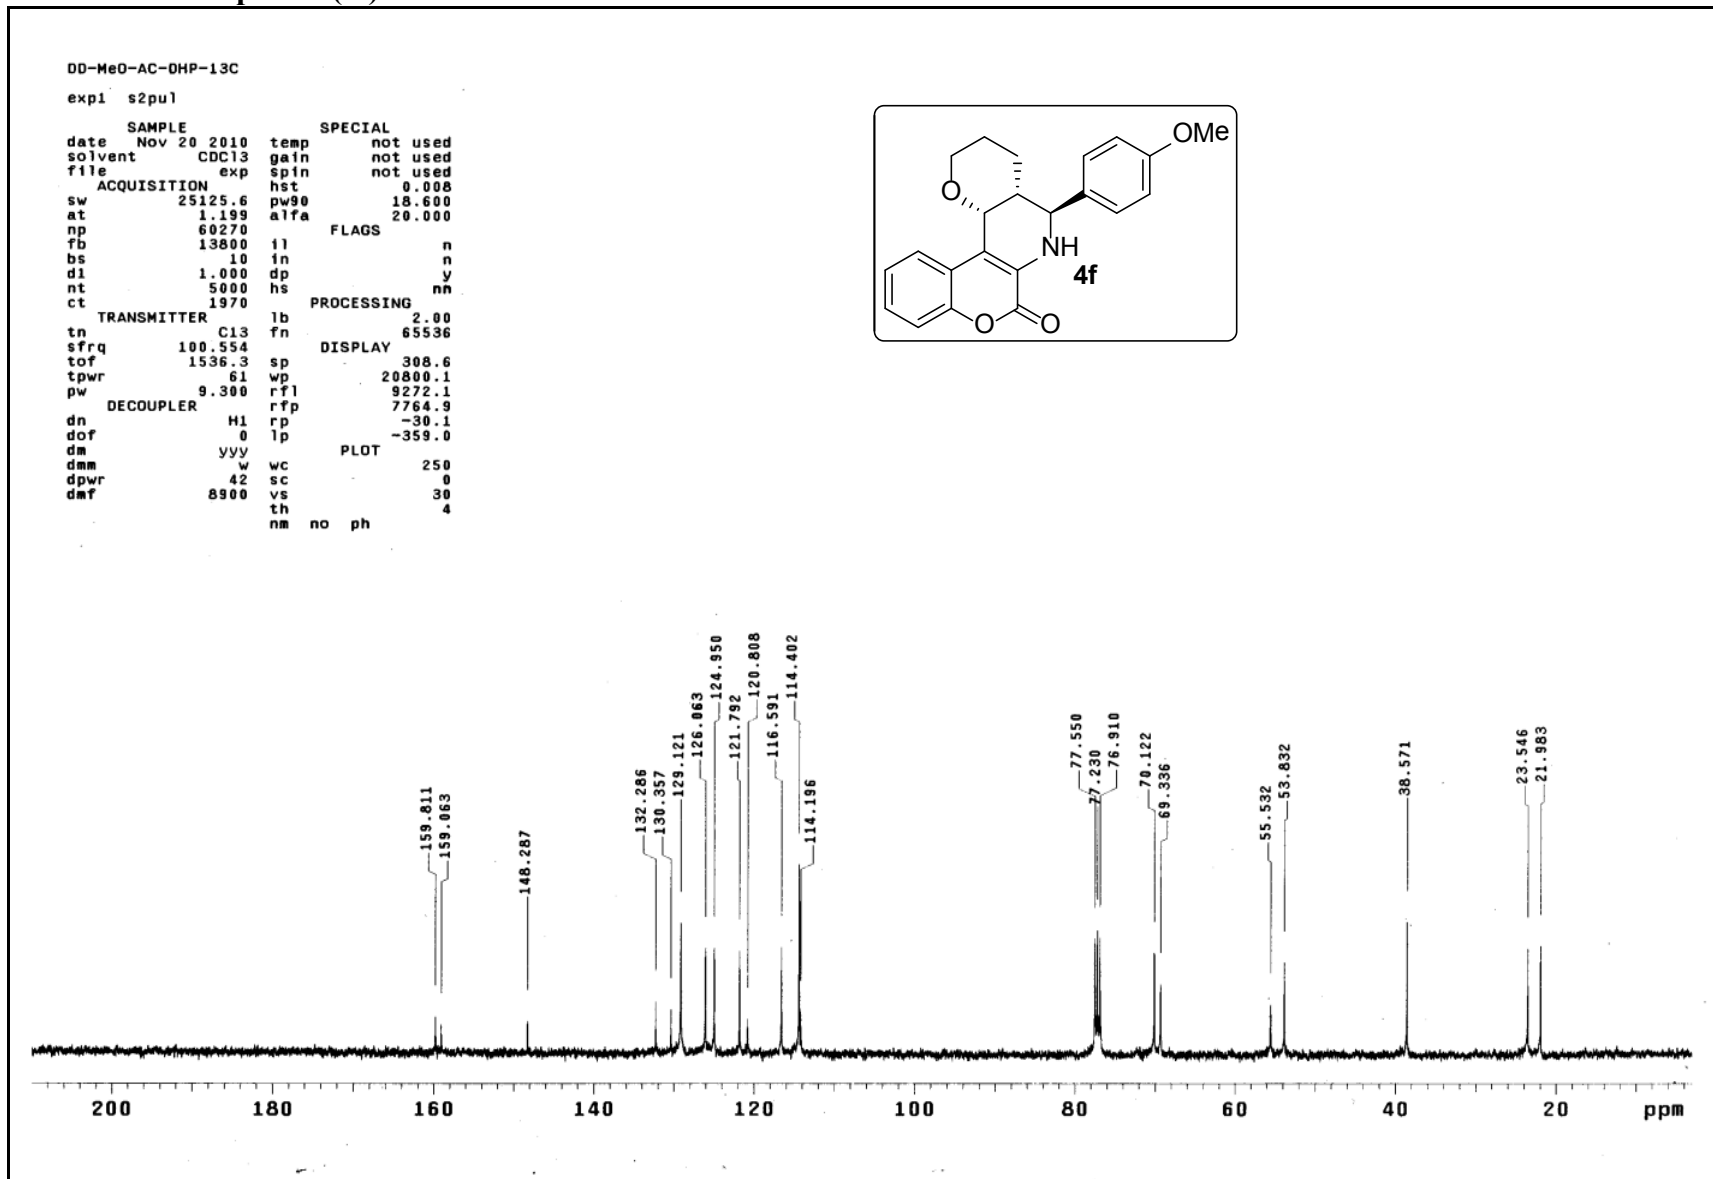

### Expansion $^1\text{H}$ NMR spectra for determining the trans : cis ratio for Compound (g)

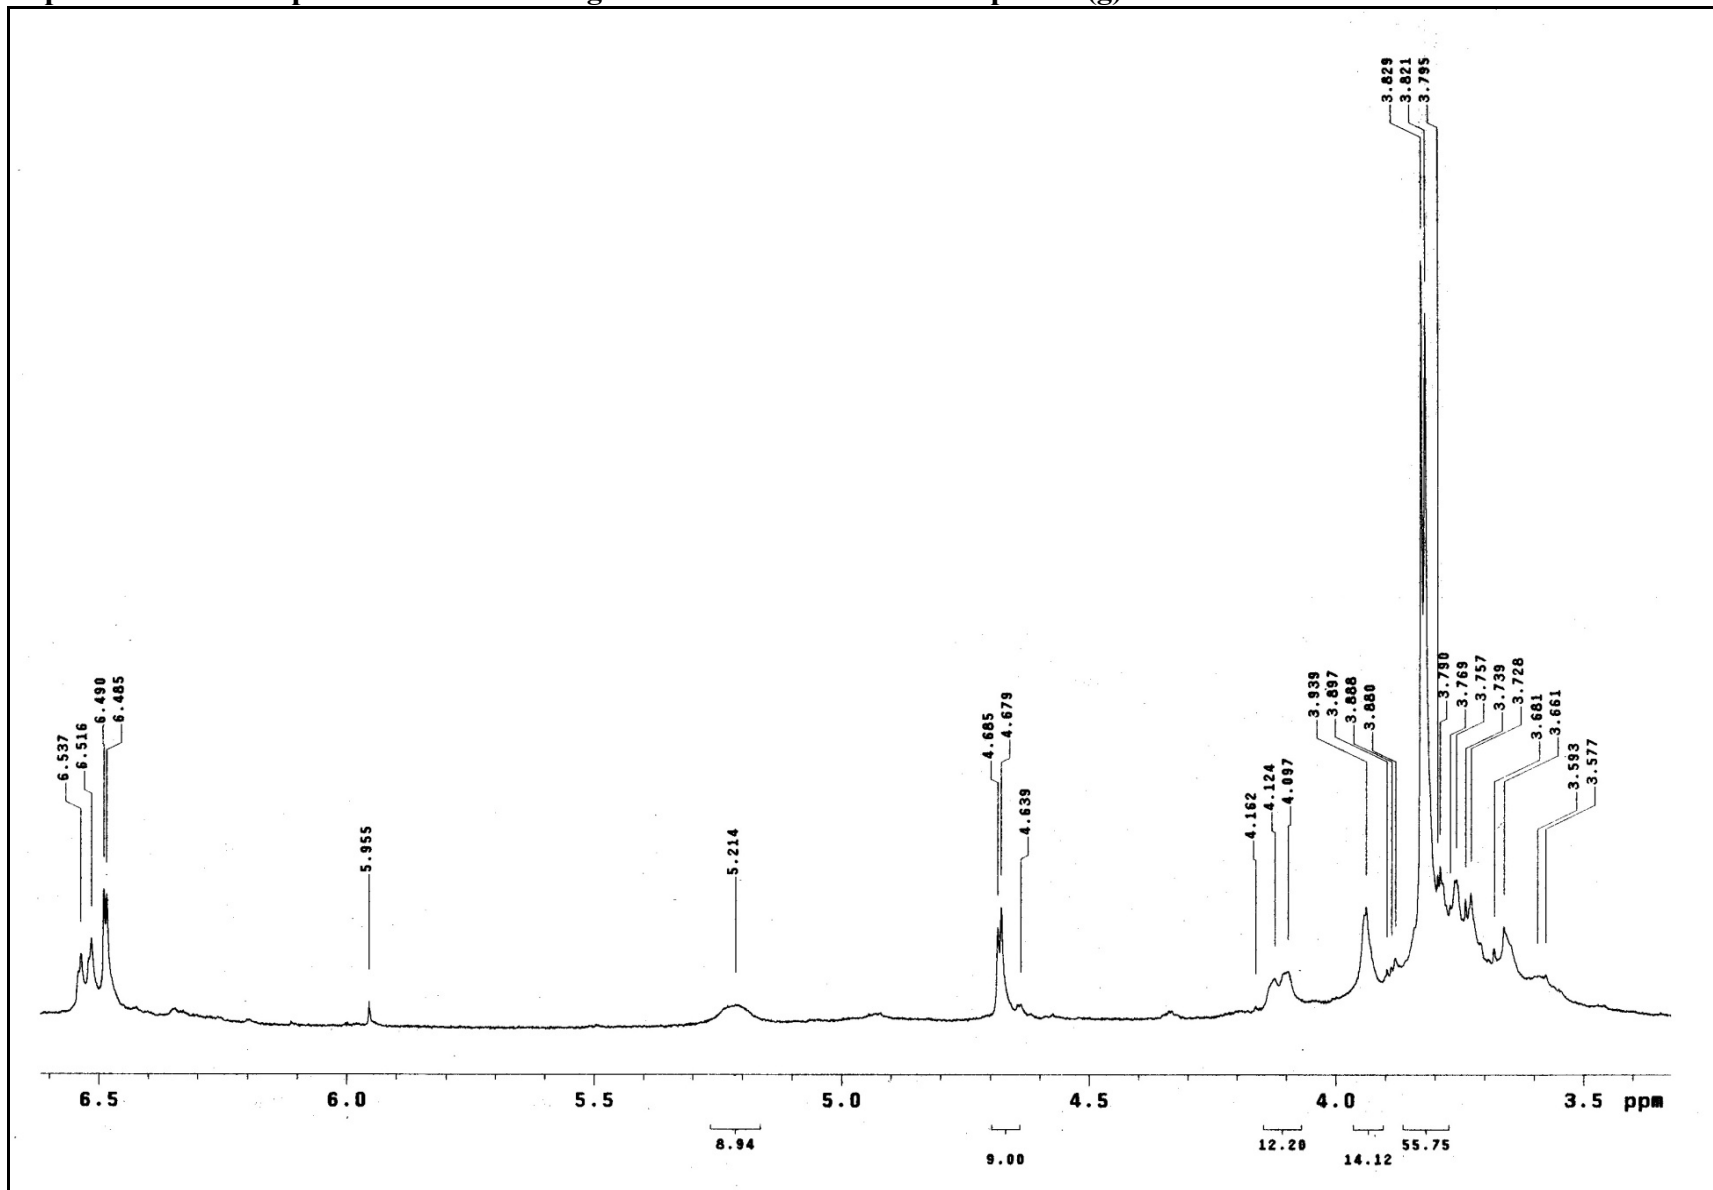

### <sup>1</sup>H NMR Spectra of Compound (4g)

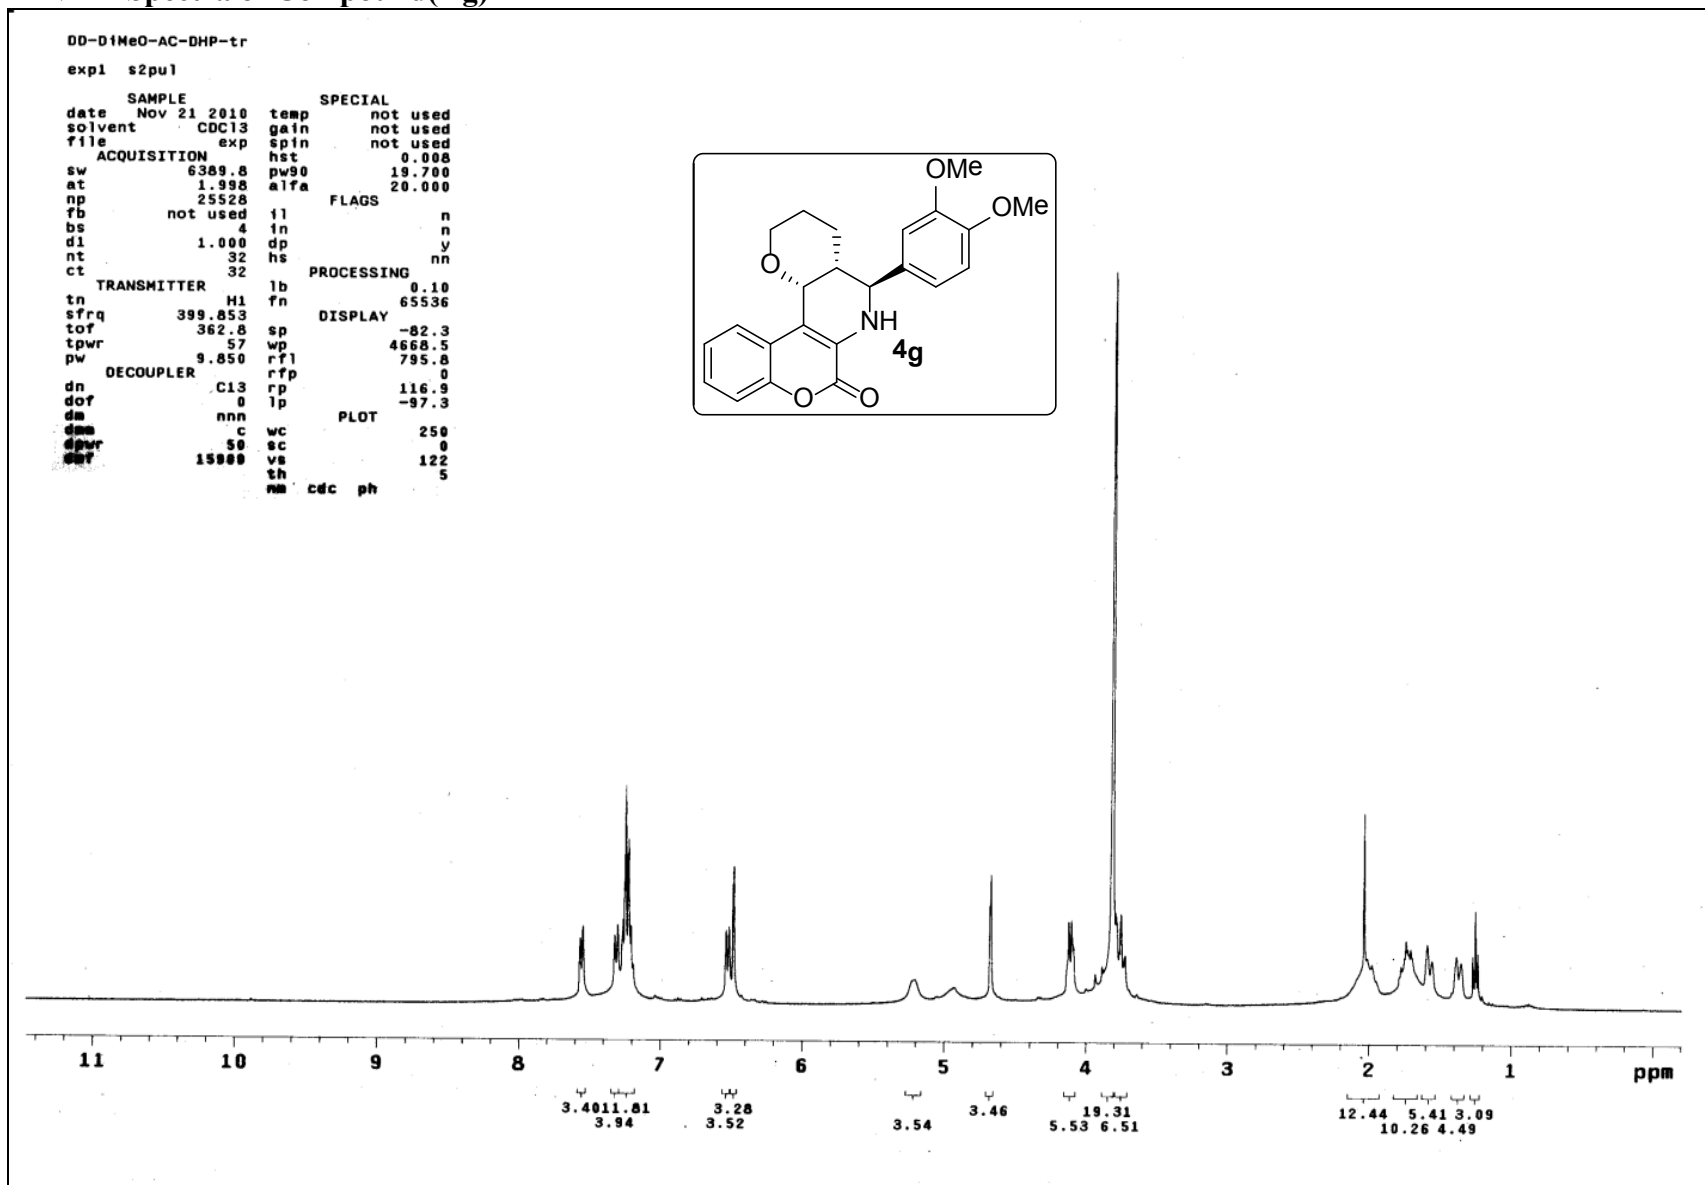

### <sup>13</sup>CNMR of Compound (4g)

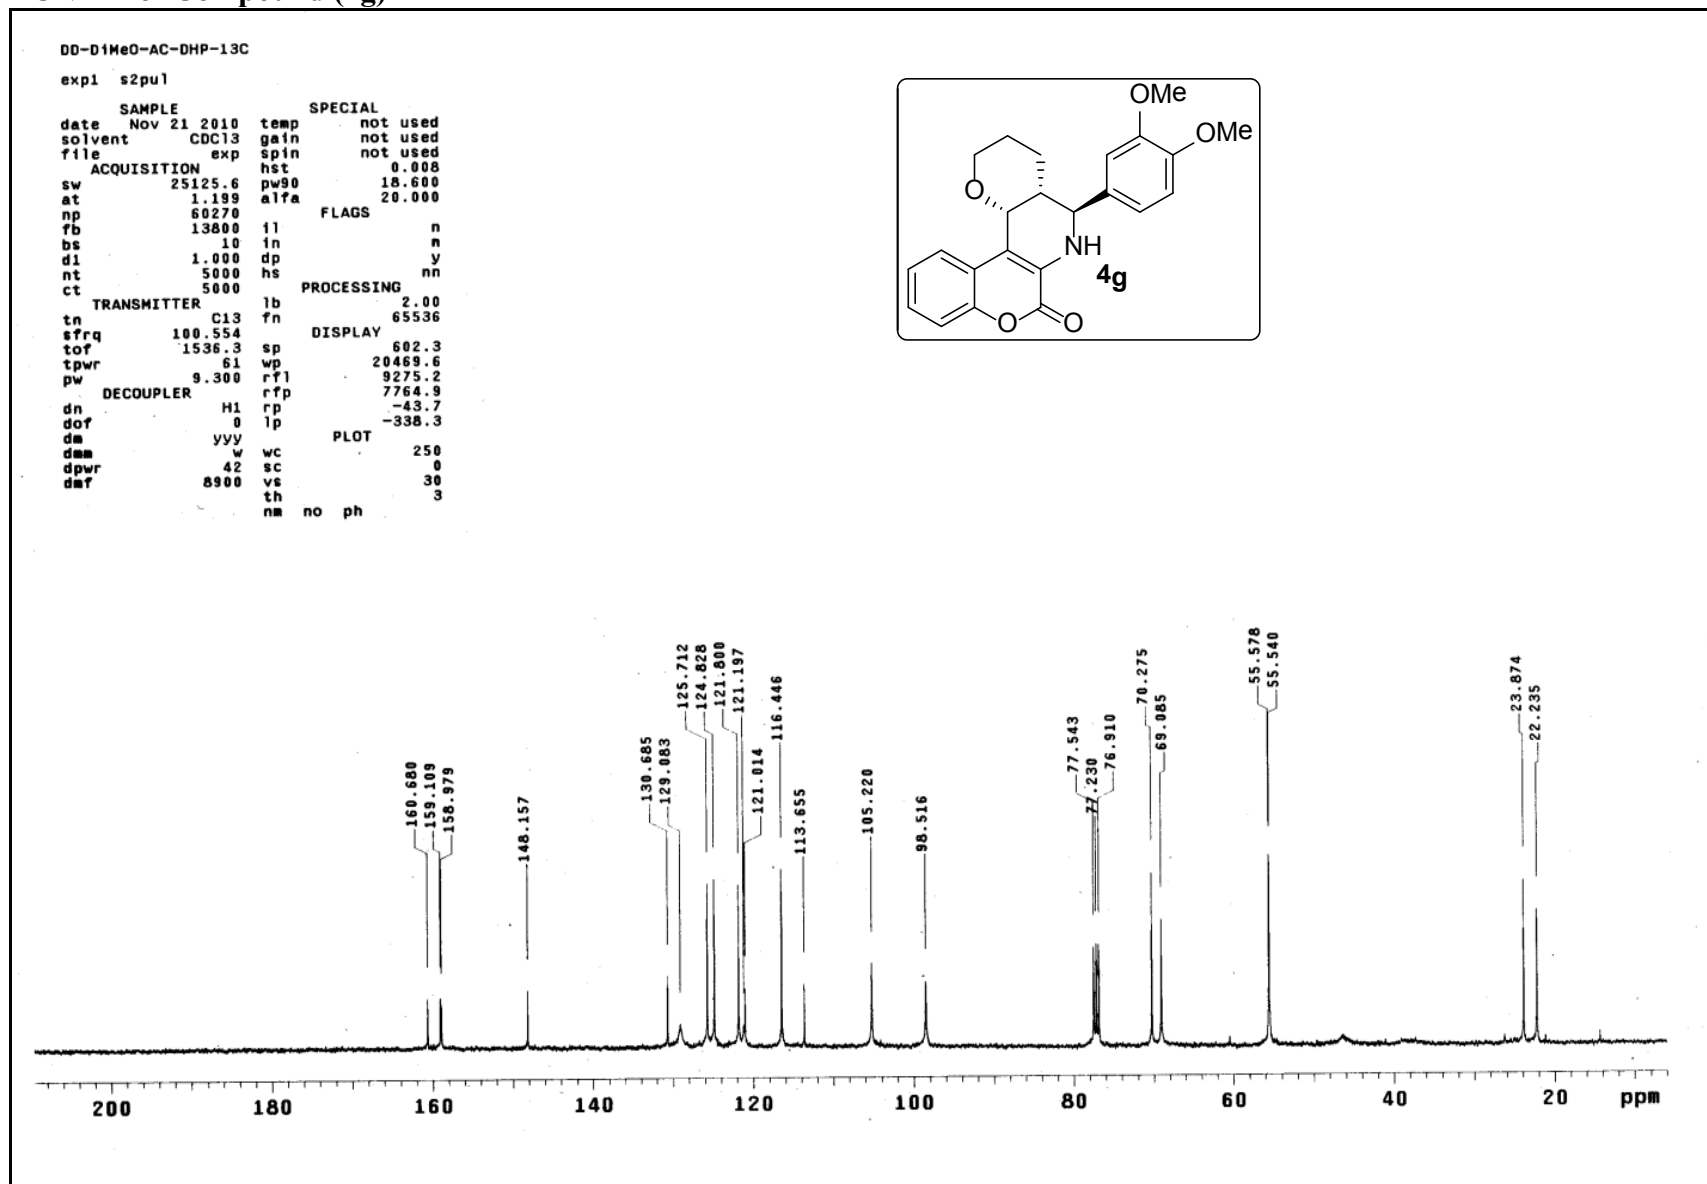



Expansion  $^1\text{H}$ NMR spectra for determining the trans : cis ratio for Compound (h)

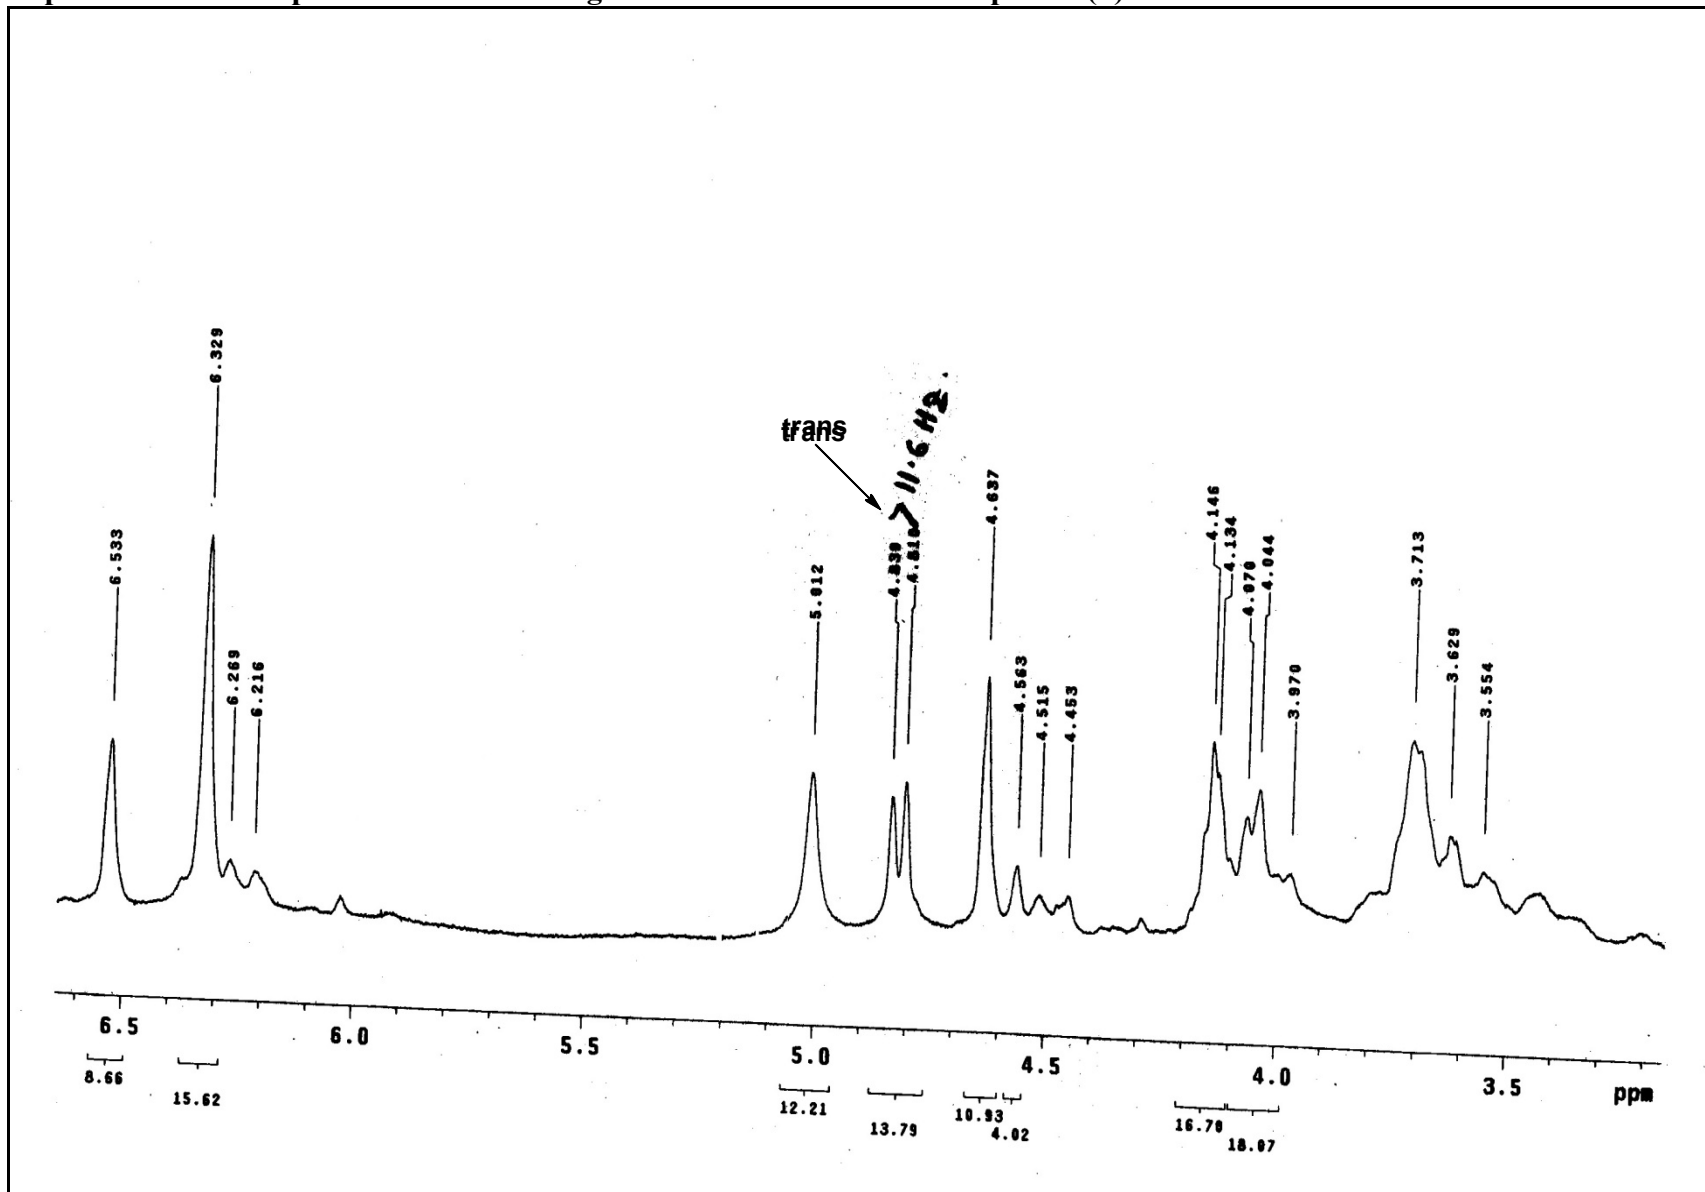

## <sup>1</sup>H NMR Spectra of Compound(4h)

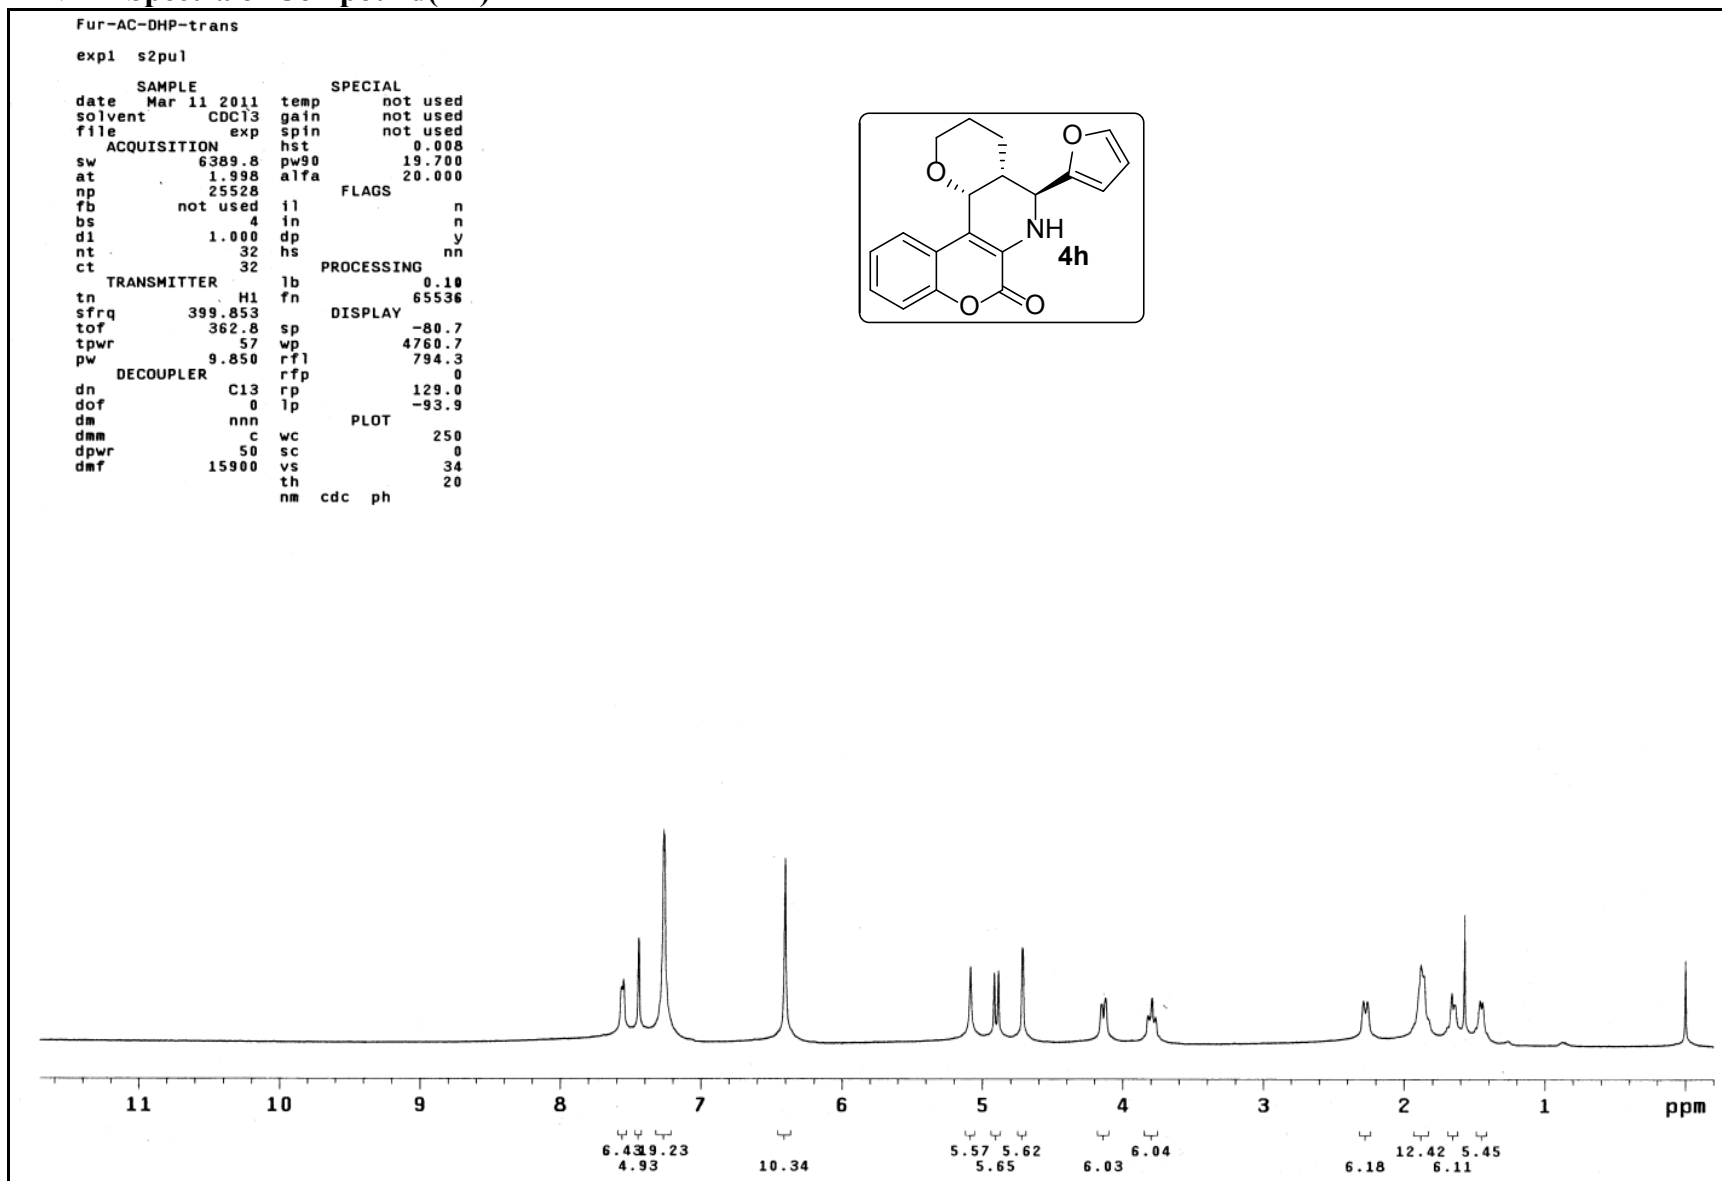

### <sup>13</sup>CNMR of Compound (4h)

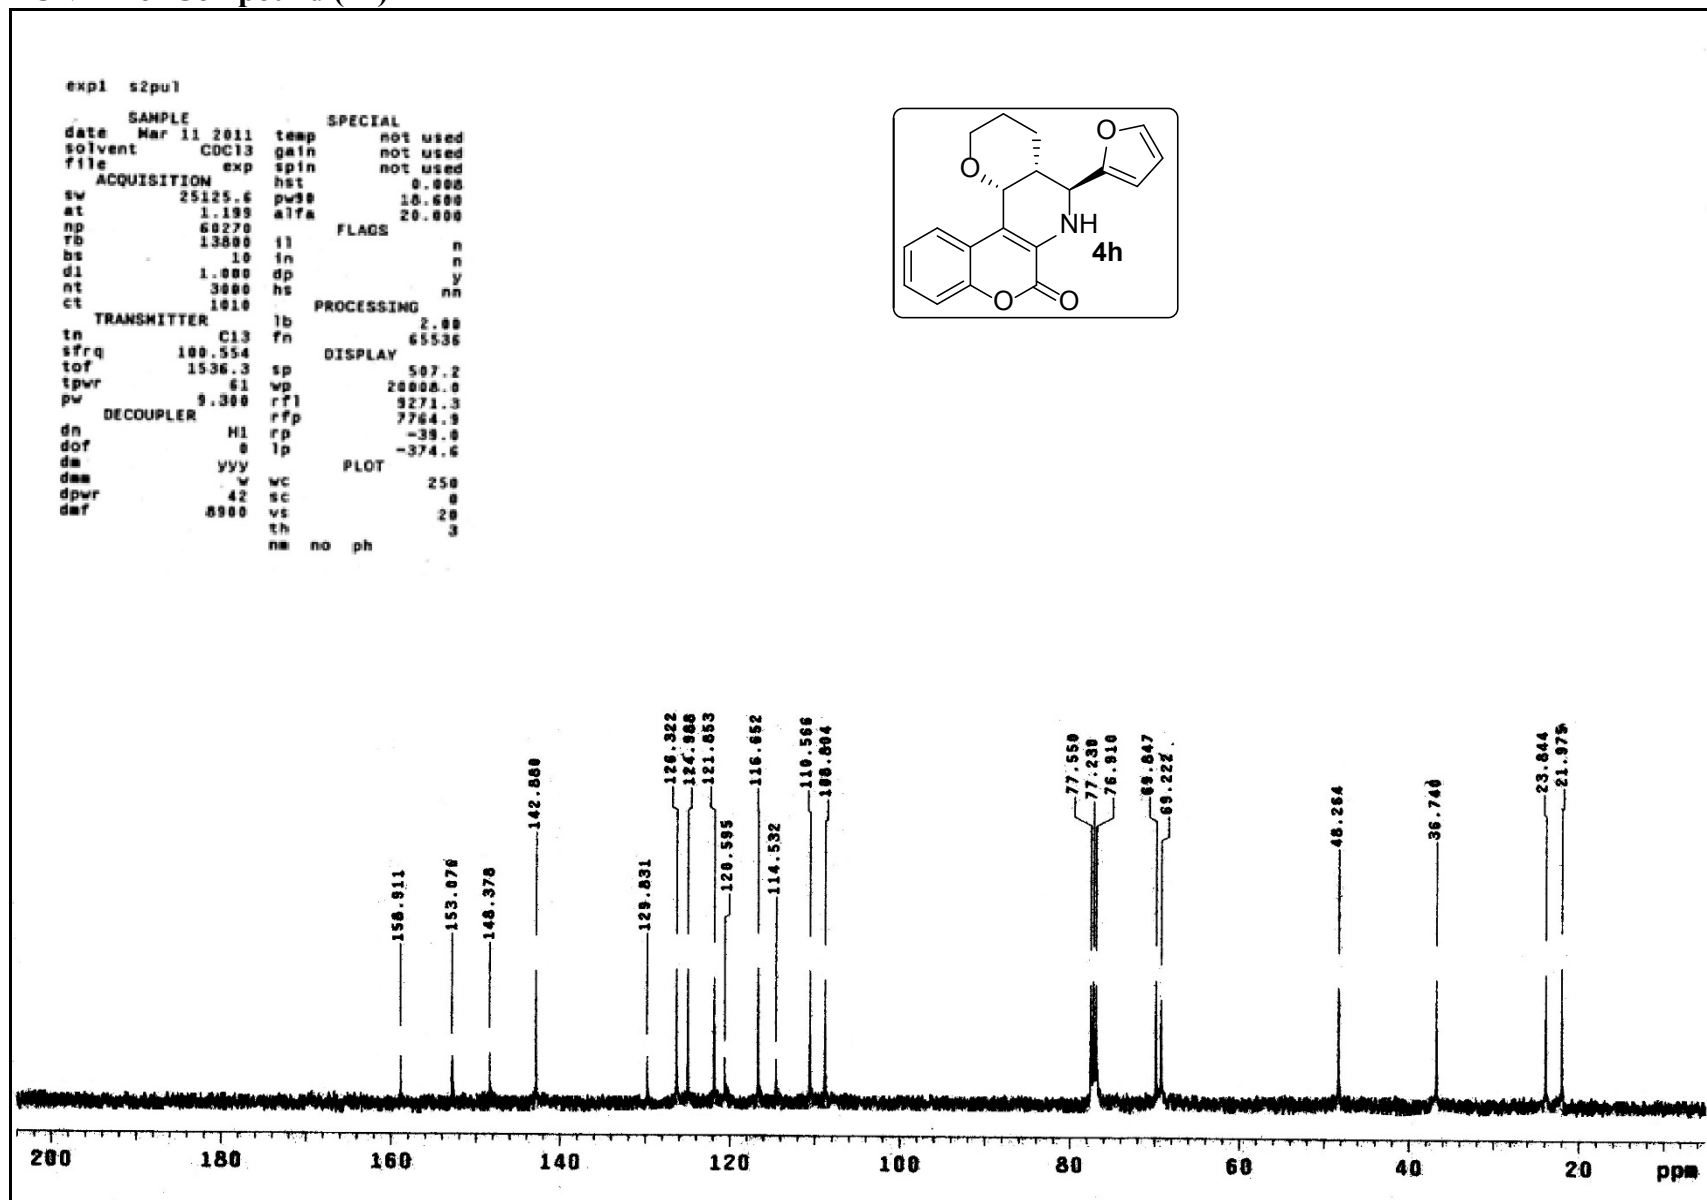

## HRMS of Compound (h)

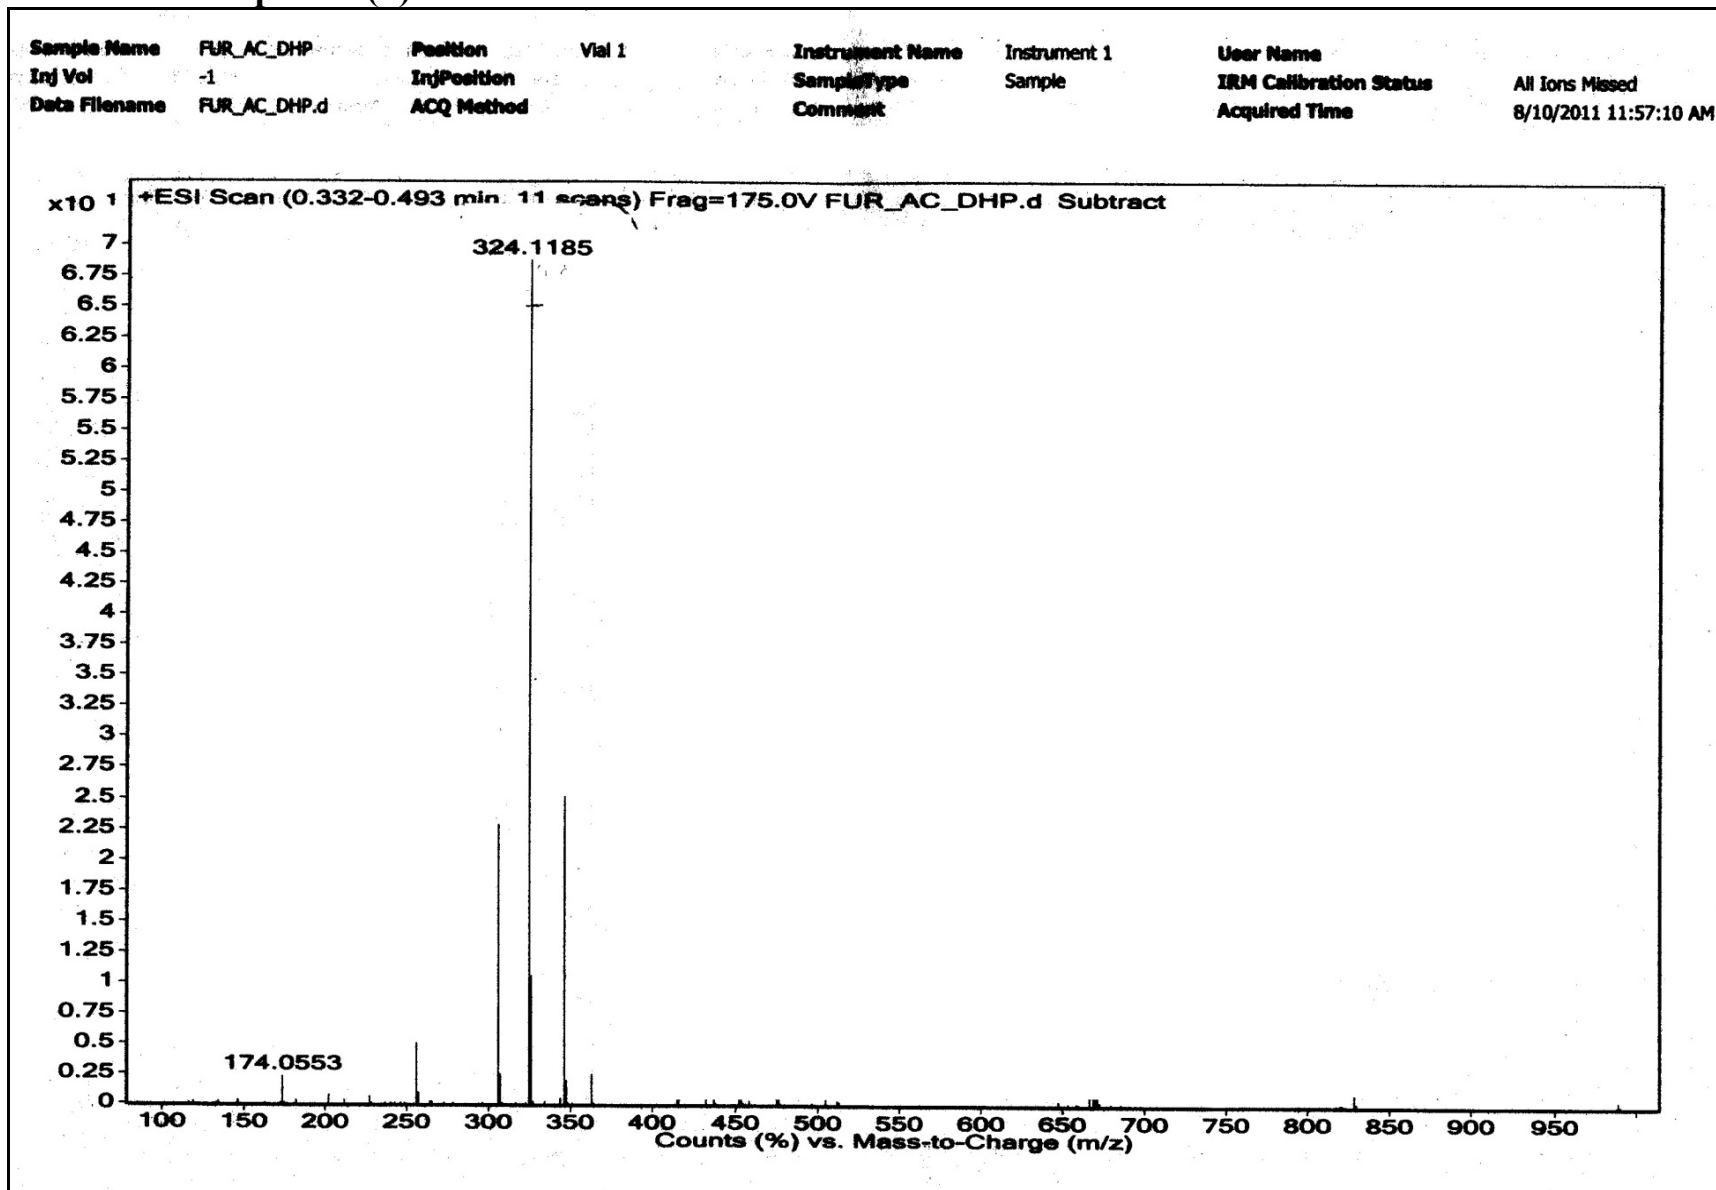

### Expansion $^1\text{H}$ NMR spectra for determining the trans : cis ratio for Compound (i)

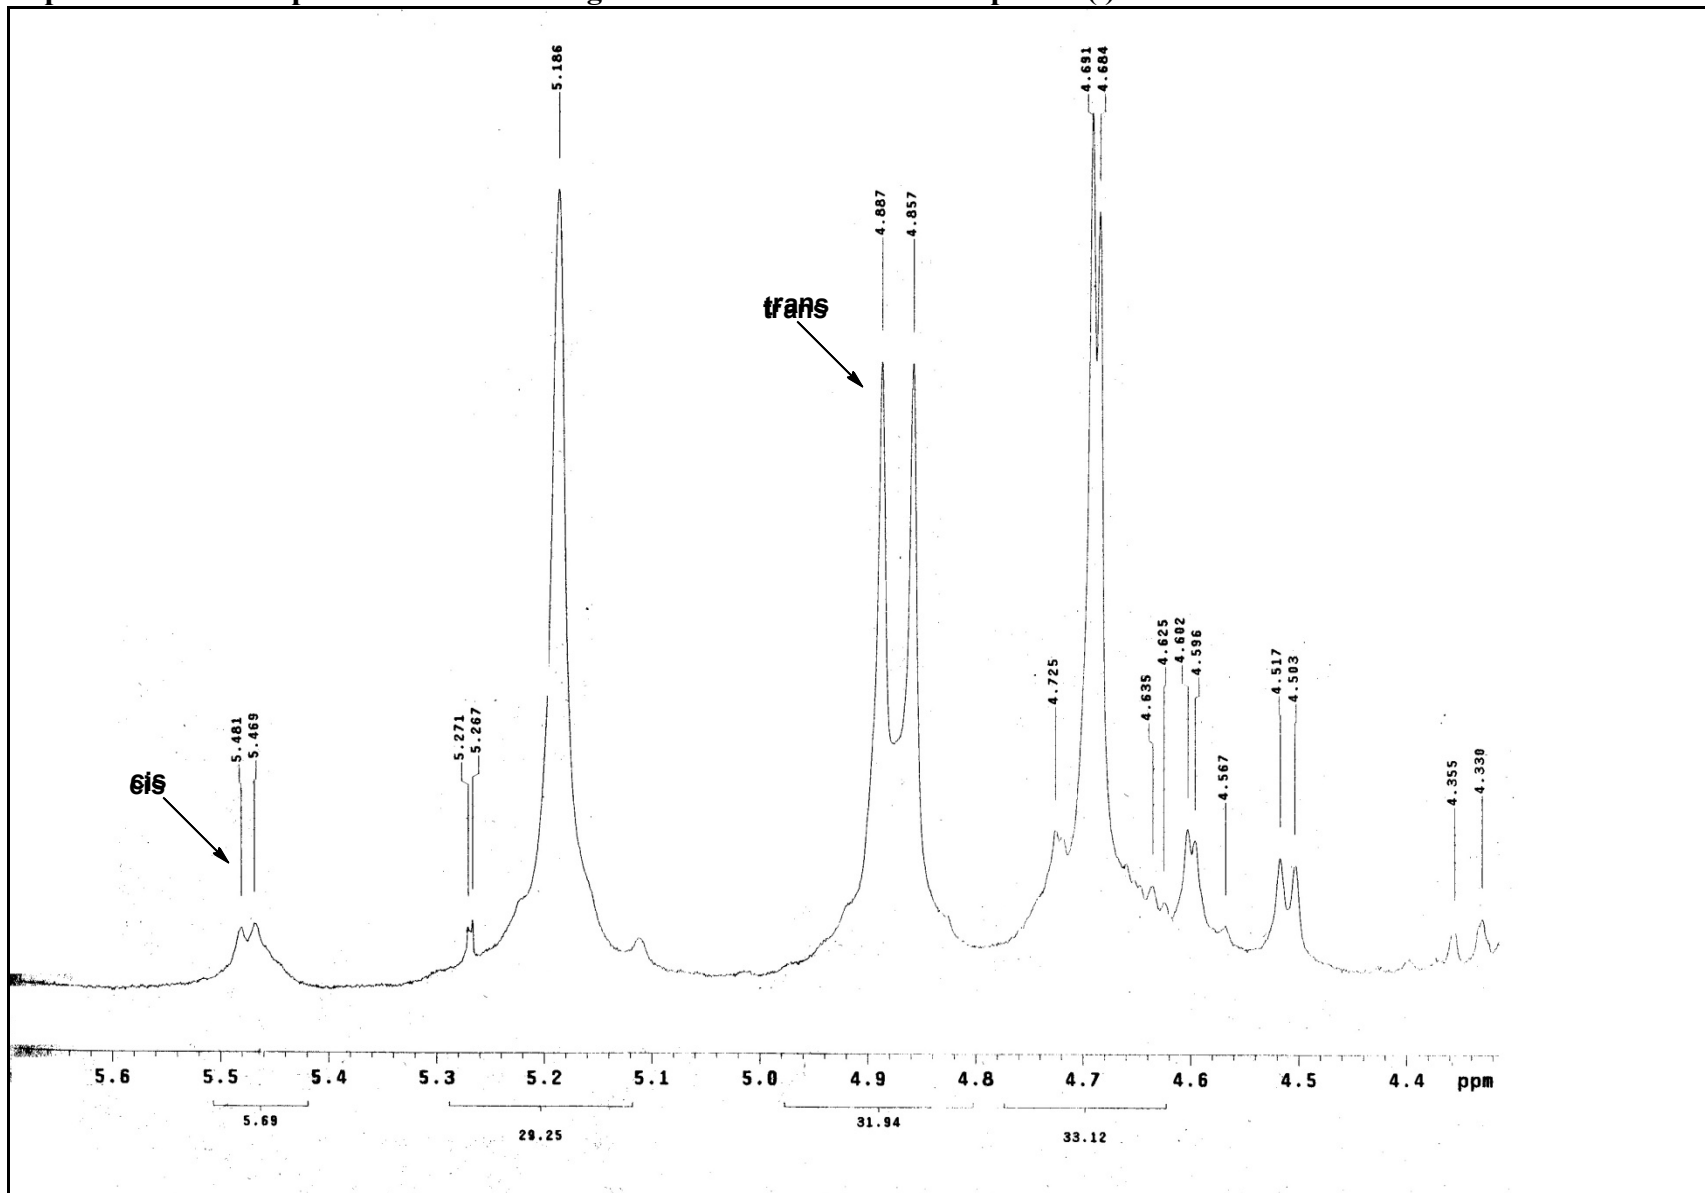

# <sup>1</sup>H NMR Spectra of Compound (4i)

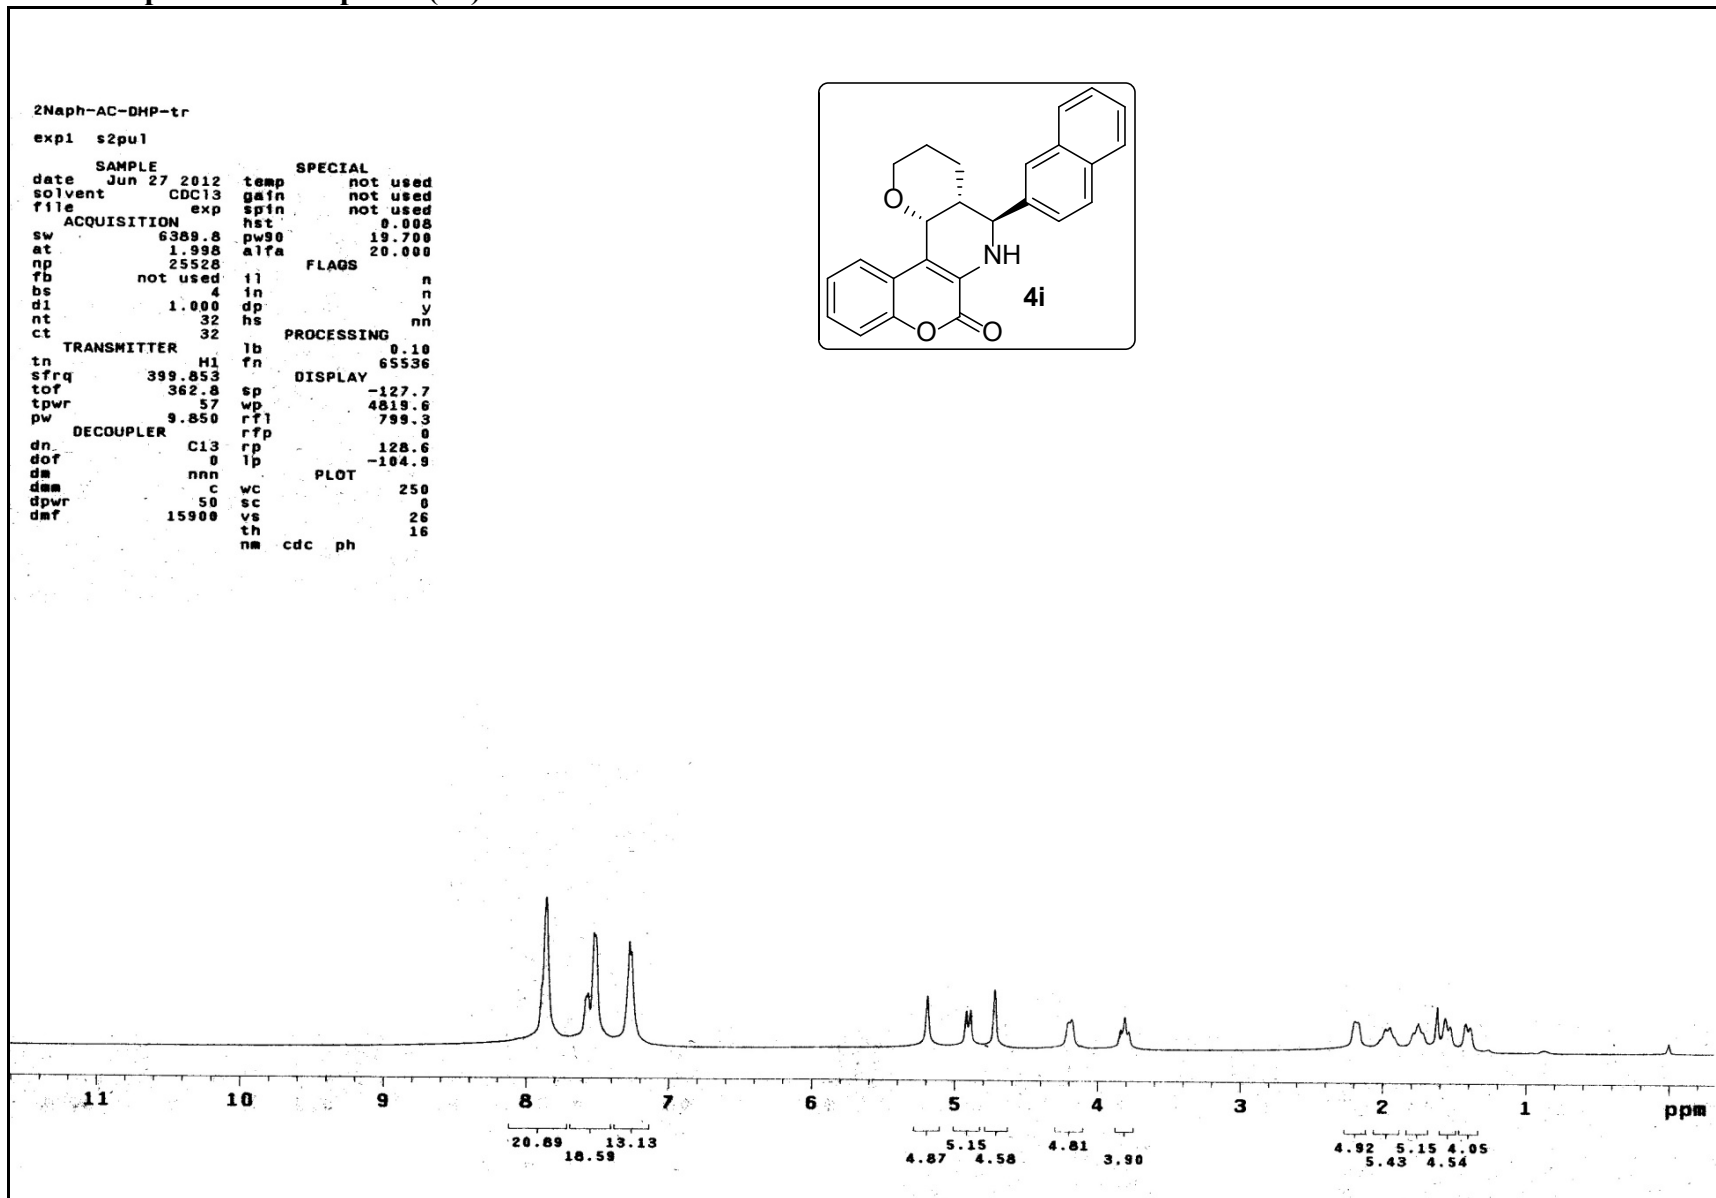

### <sup>13</sup>CNMR of Compound (4i)

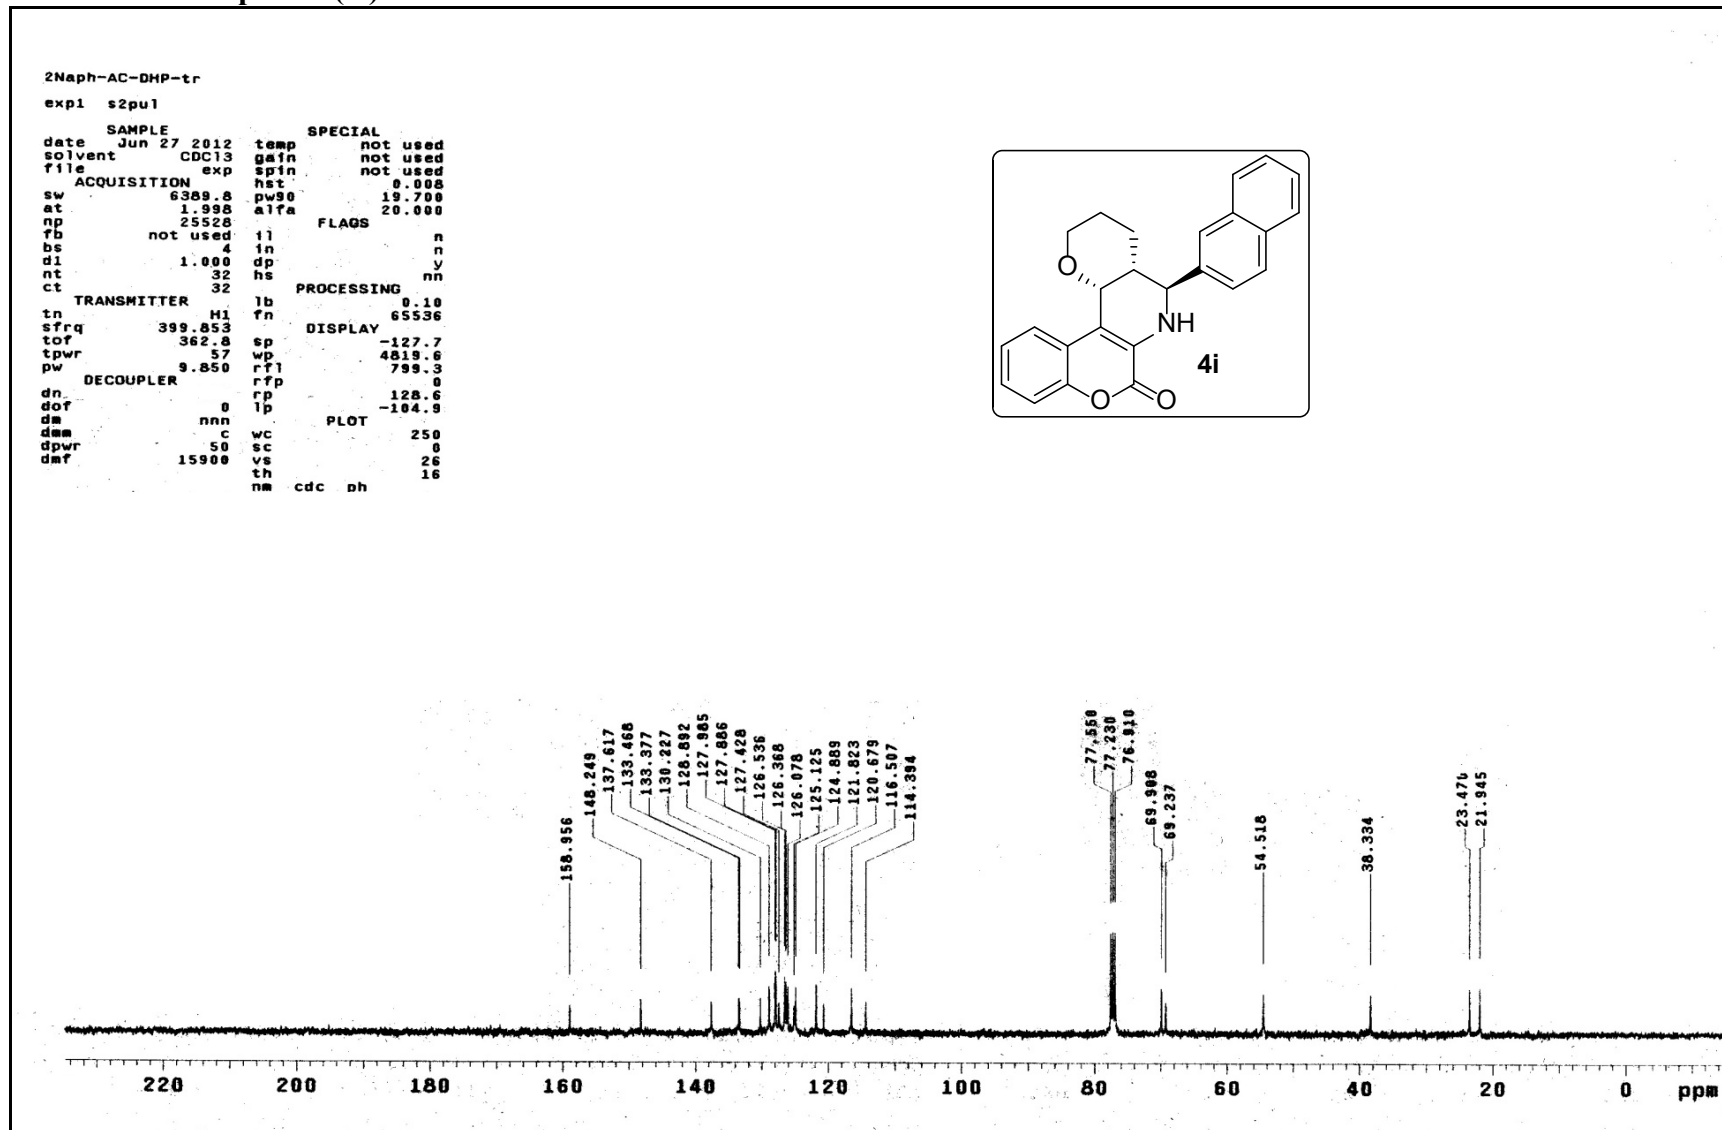

# <sup>1</sup>H NMR Spectra of Compound (5i)

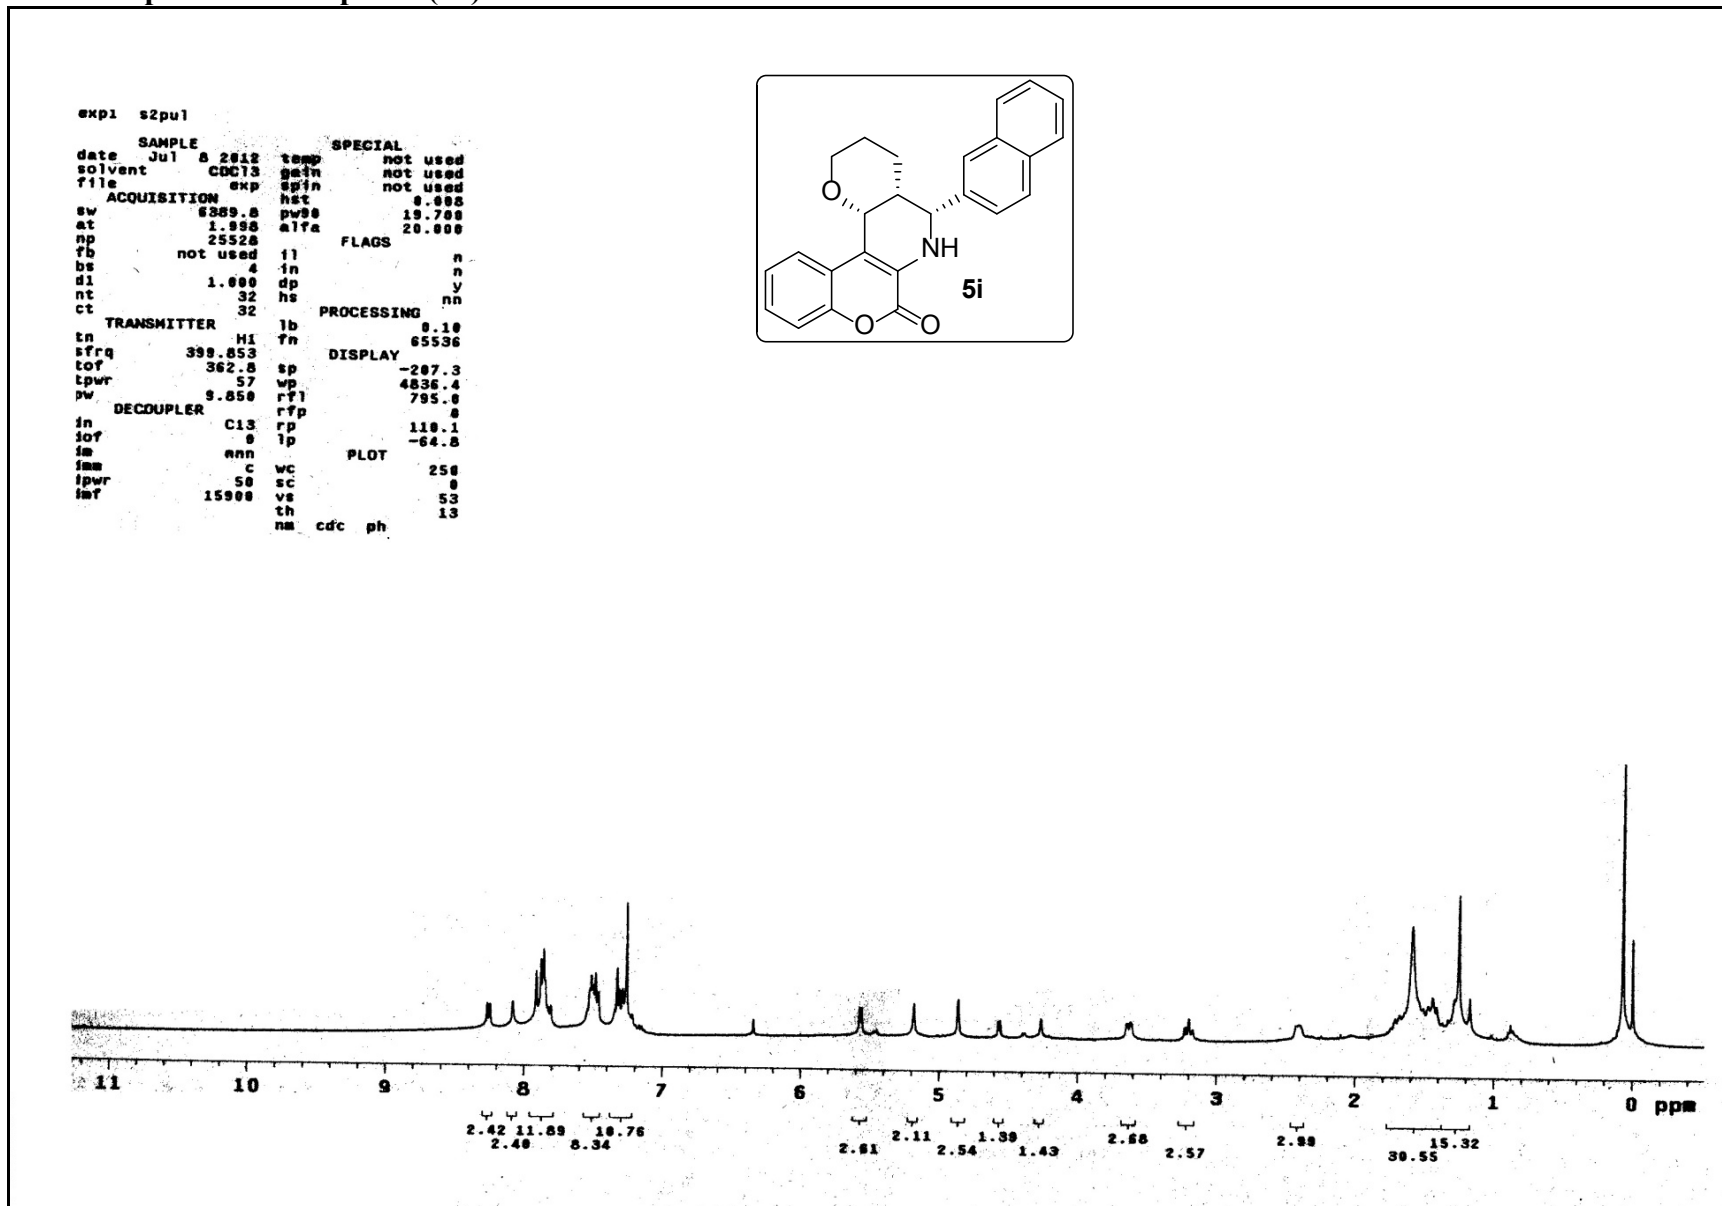



### HRMS of Compound (i)

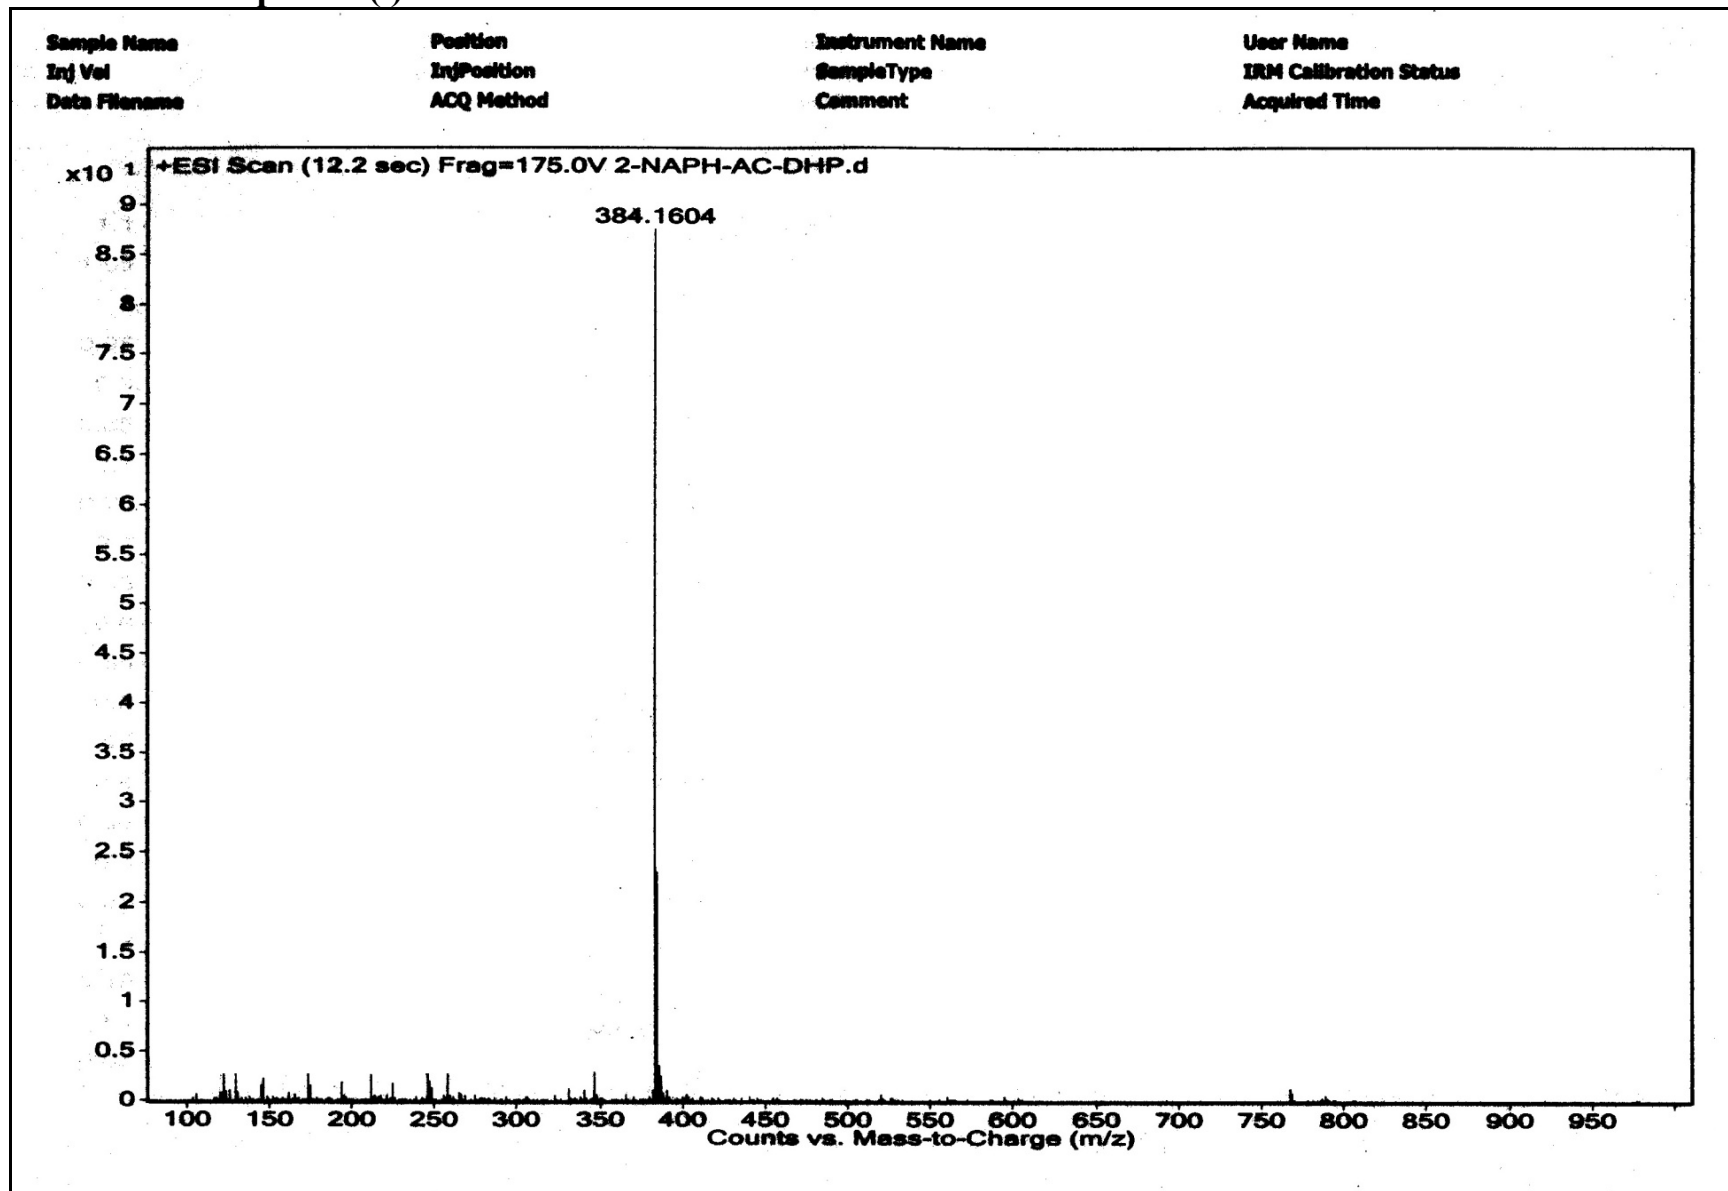

Expansion  $^1\text{H}$ NMR spectra for determining the trans : cis ratio for Compound (j)

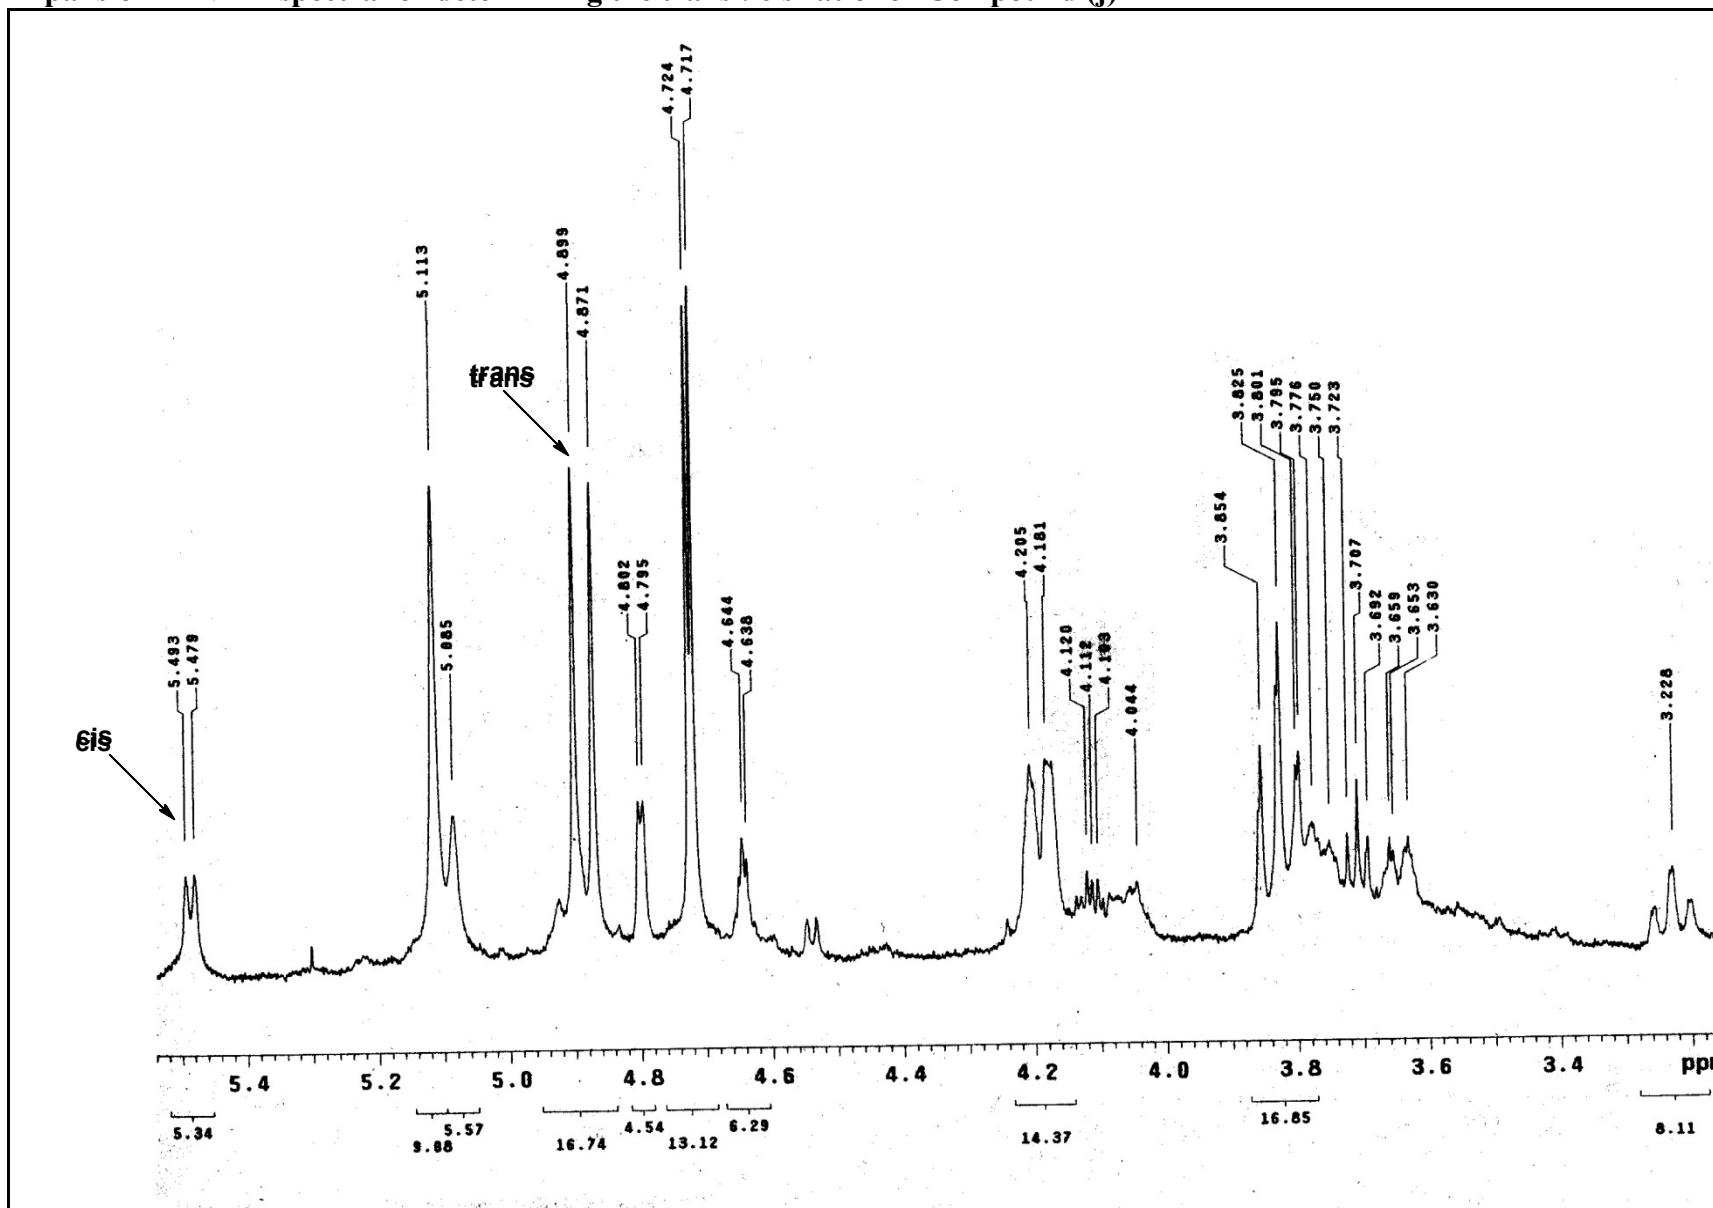

### <sup>1</sup>H NMR Spectra of Compound (4j)

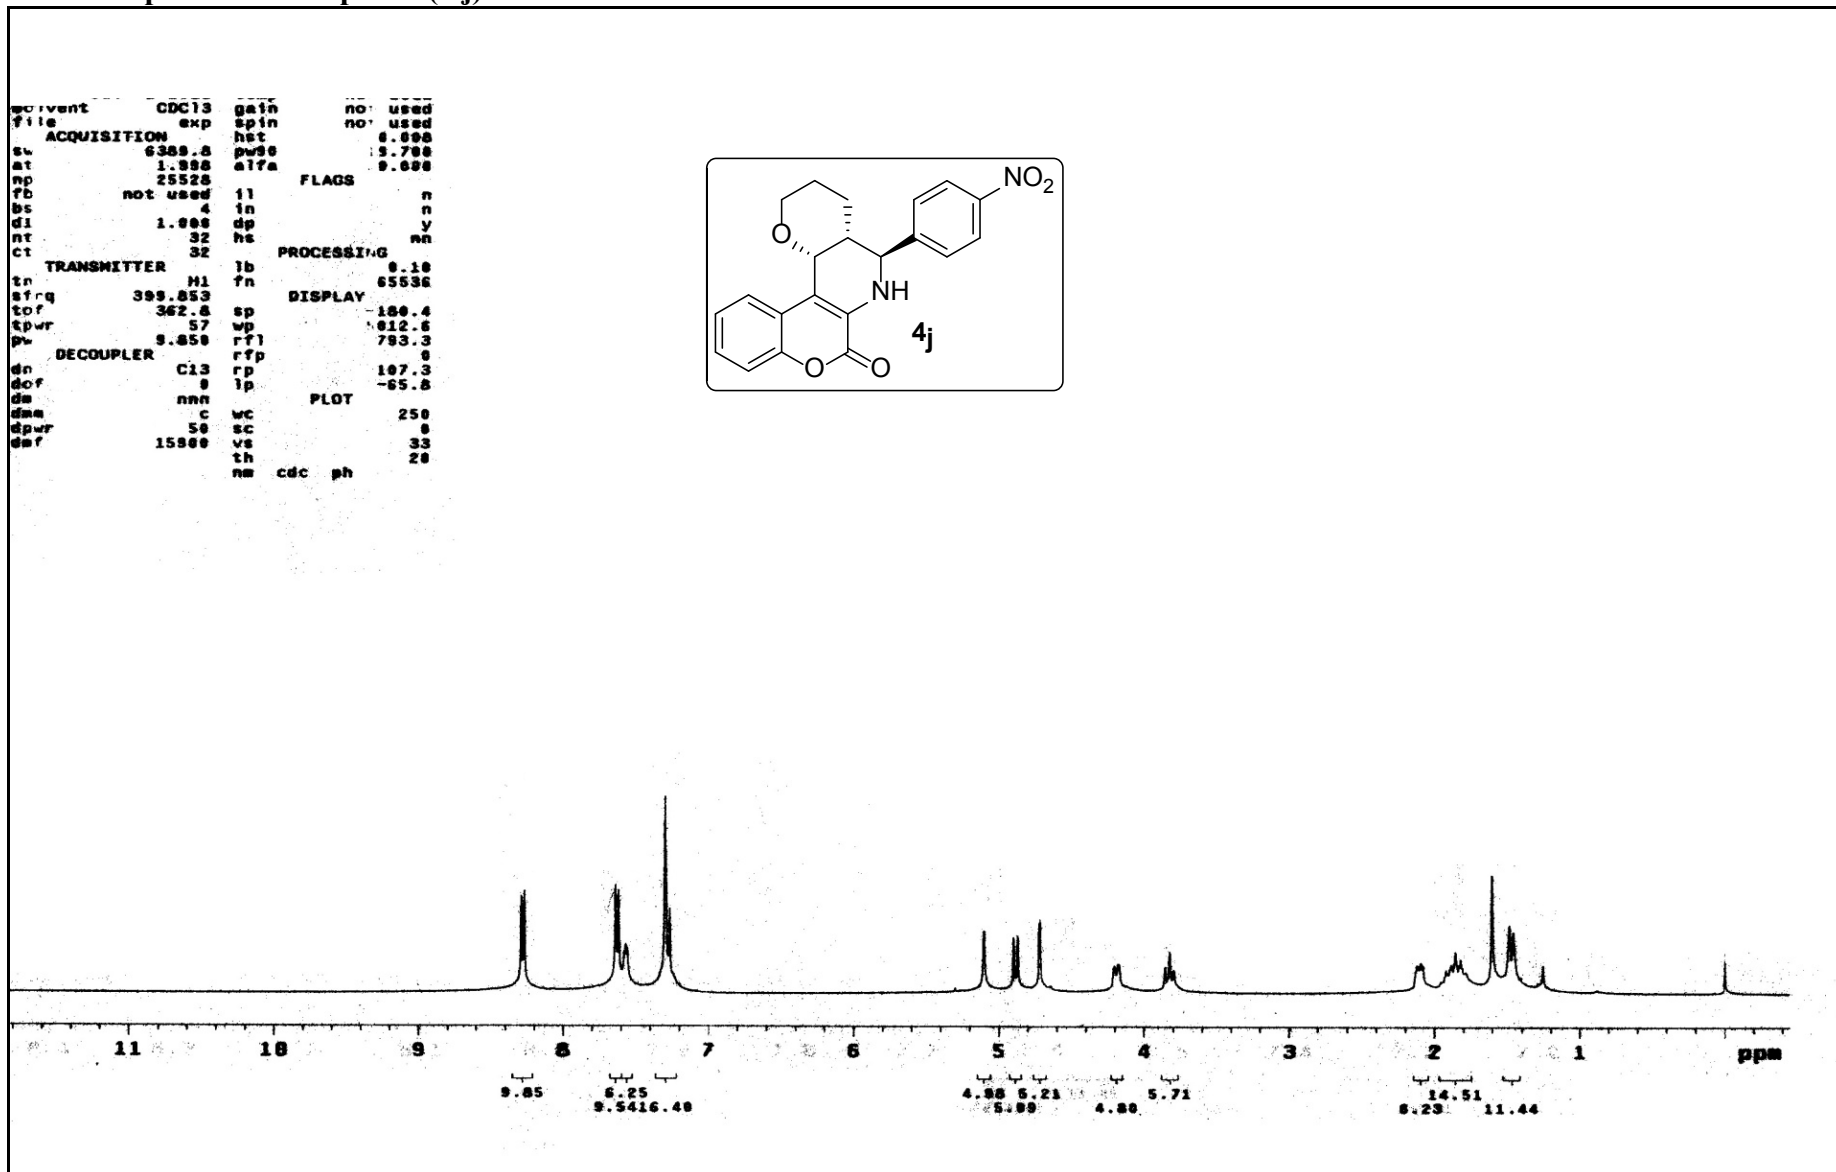

## HRMS of Compound (j)

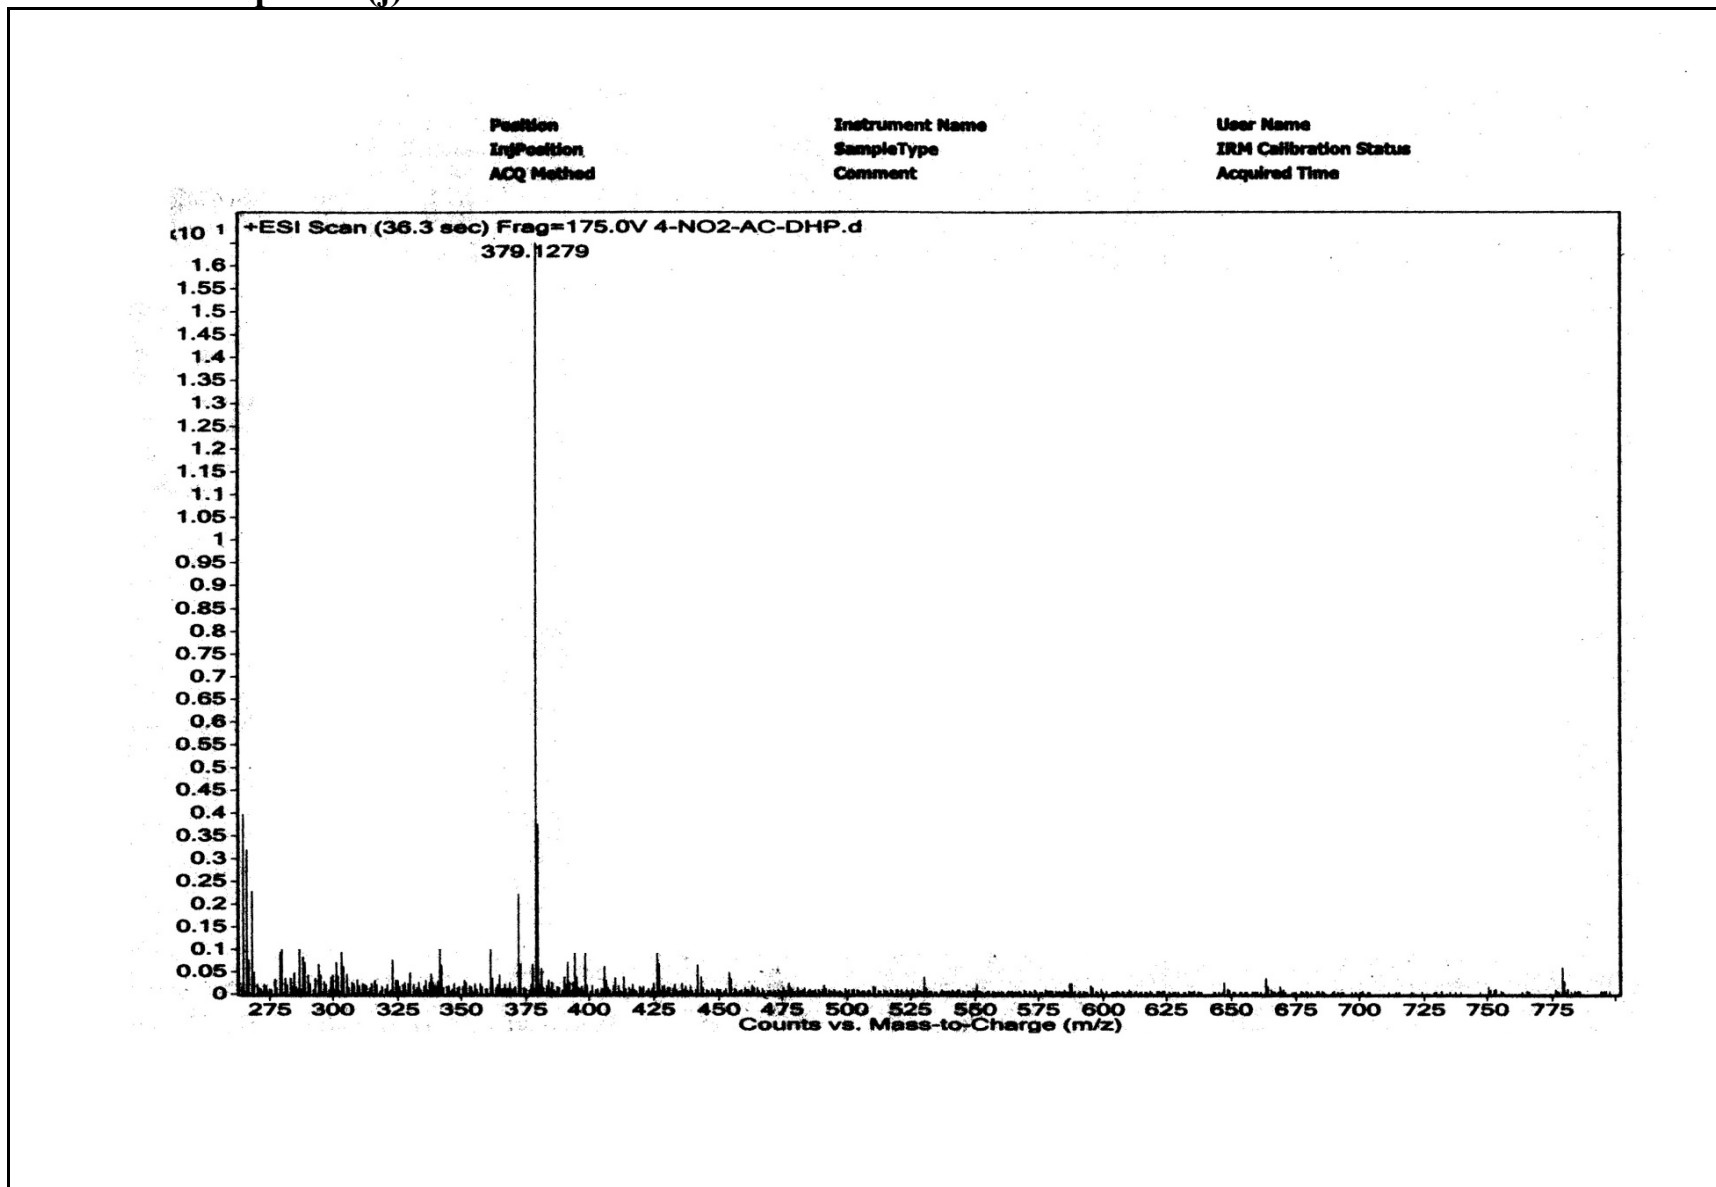

### Expansion <sup>1</sup>H NMR spectra for determining the trans : cis ratio for Compound (k)

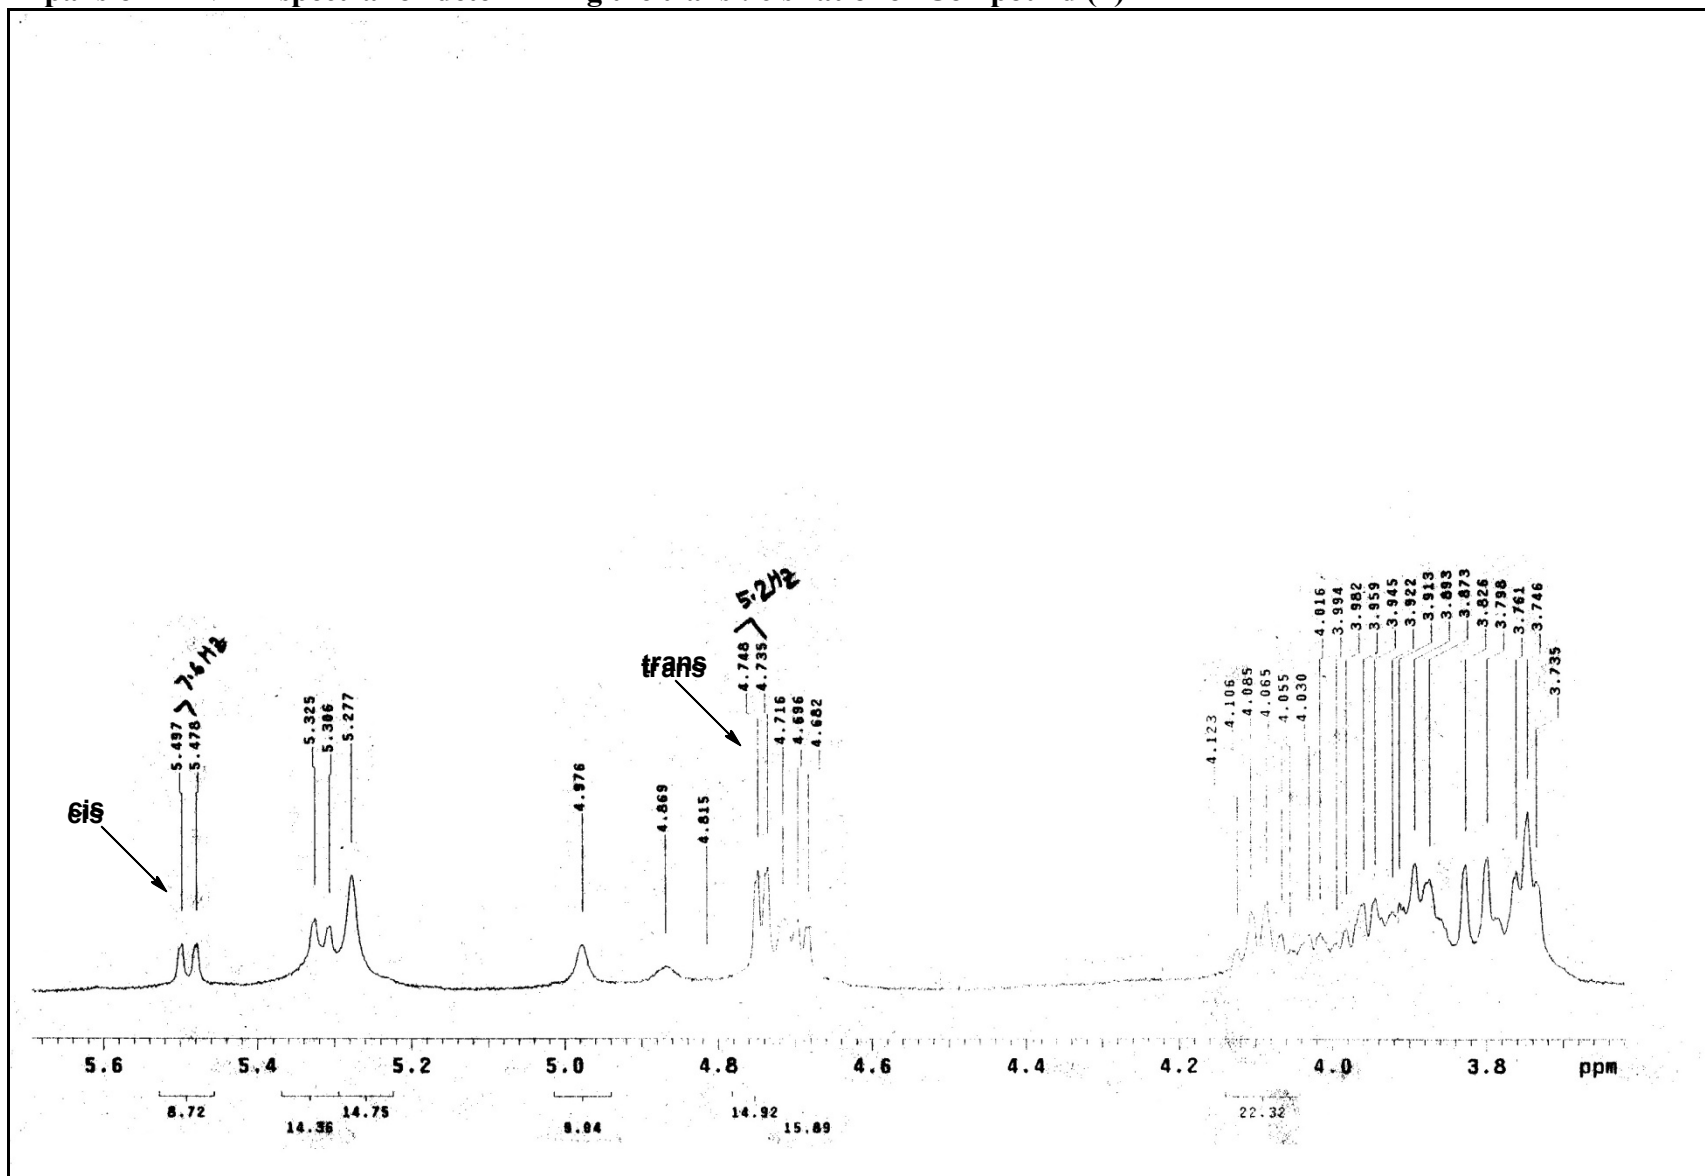

### <sup>1</sup>H NMR Spectra of Compound(4k)

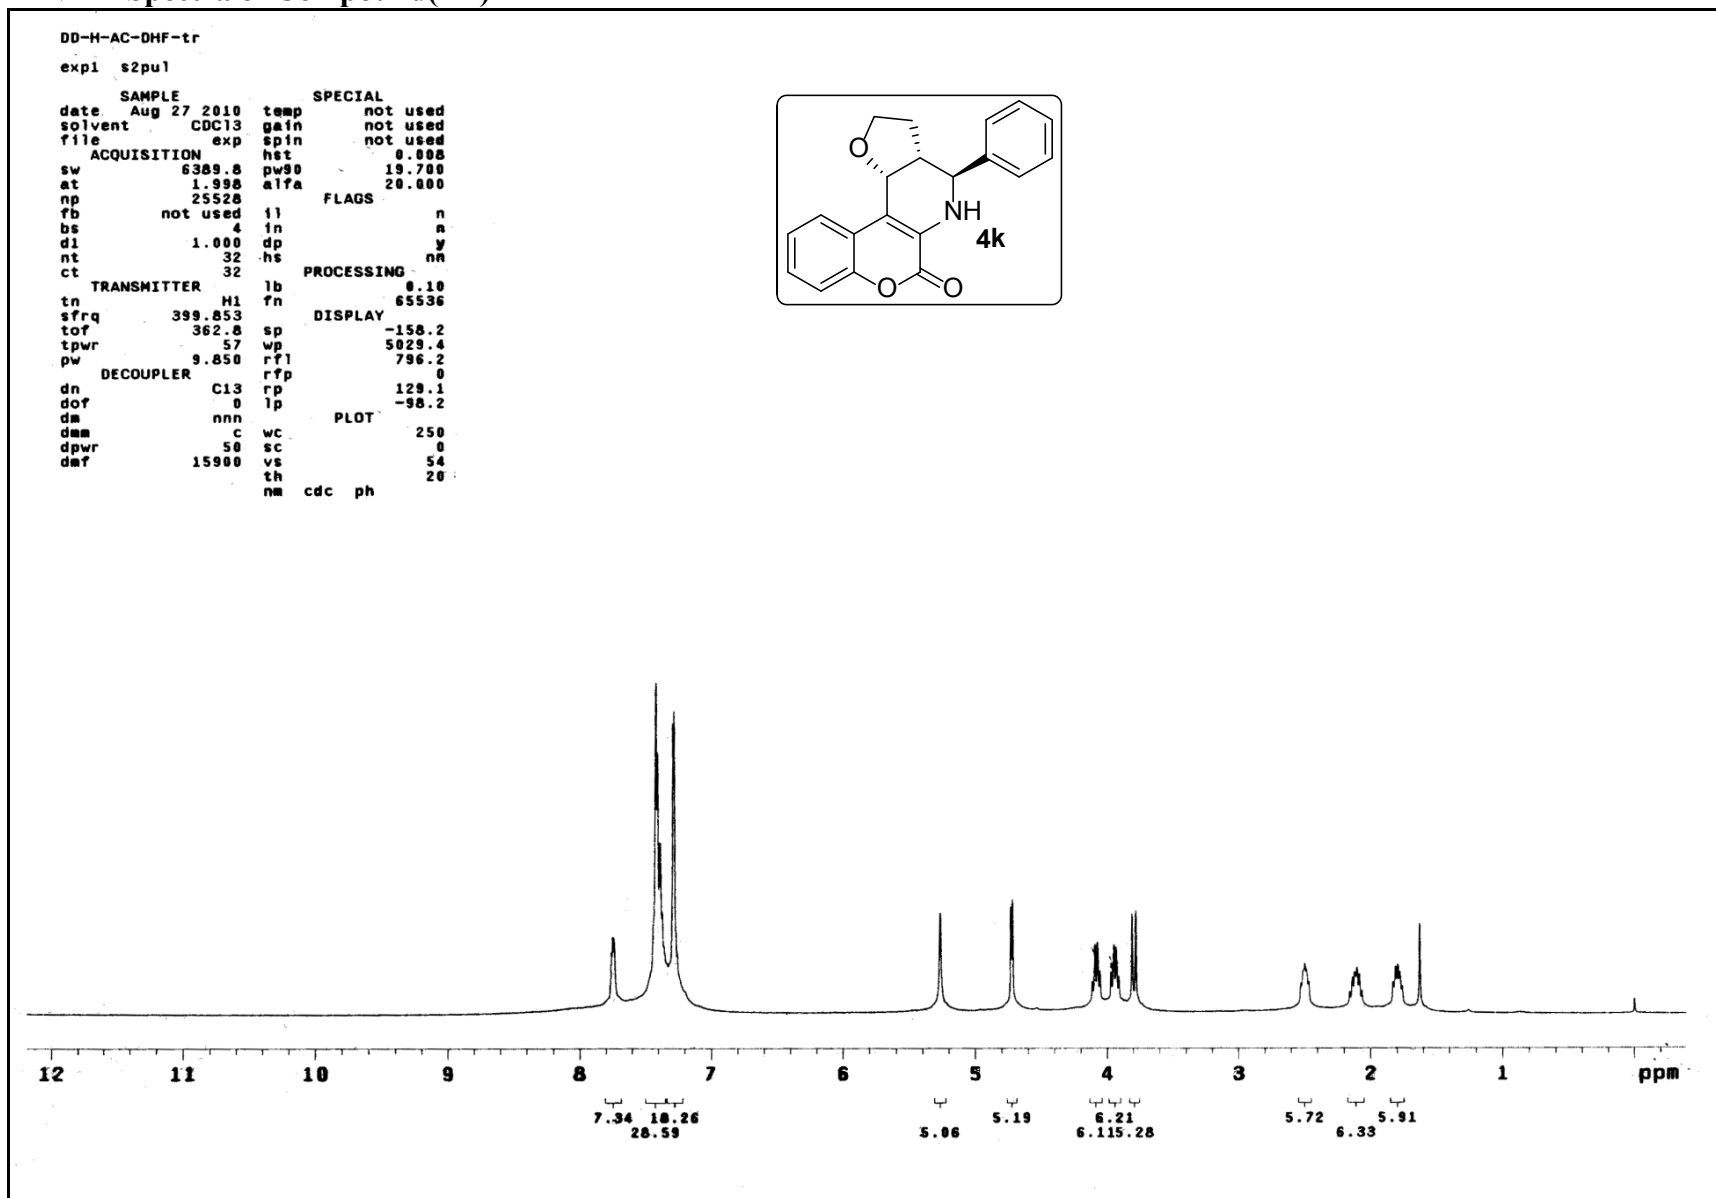

### <sup>13</sup>CNMR of Compound (4k)

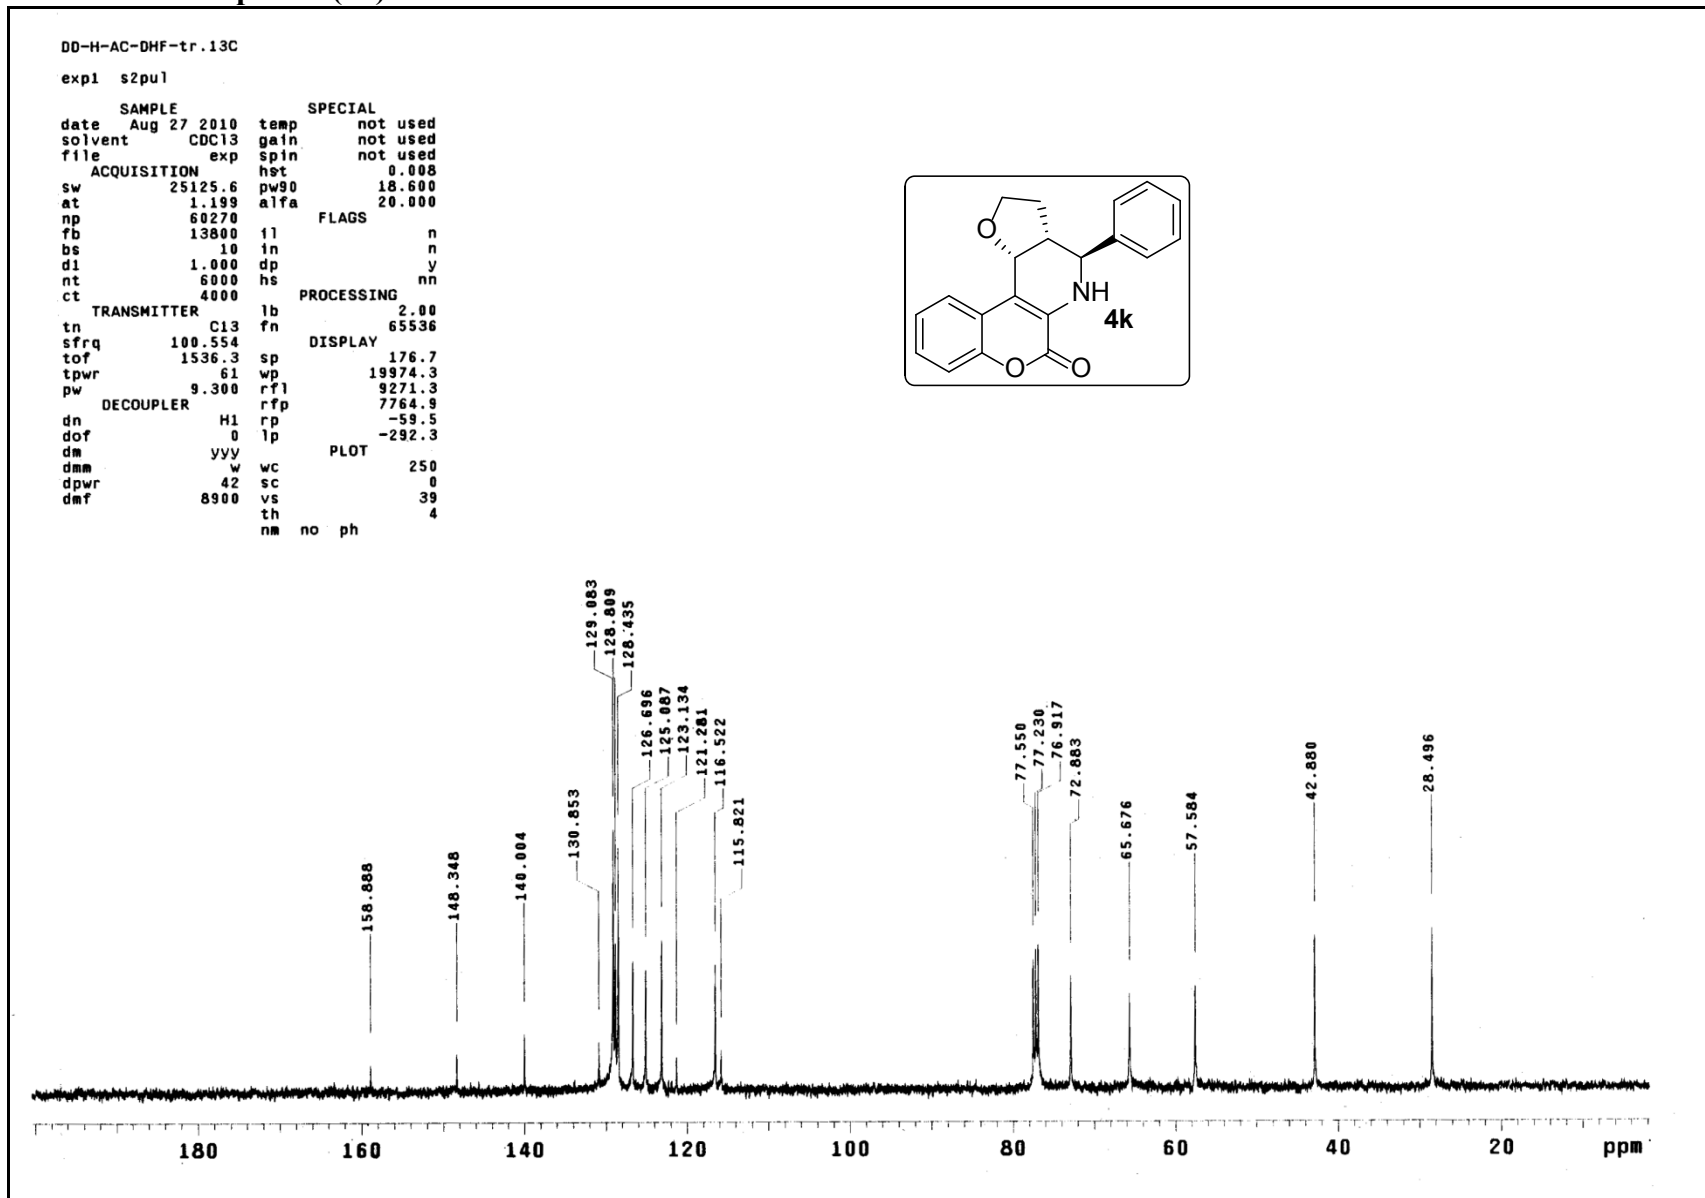

### <sup>1</sup>H NMR Spectra of Compound (5k)

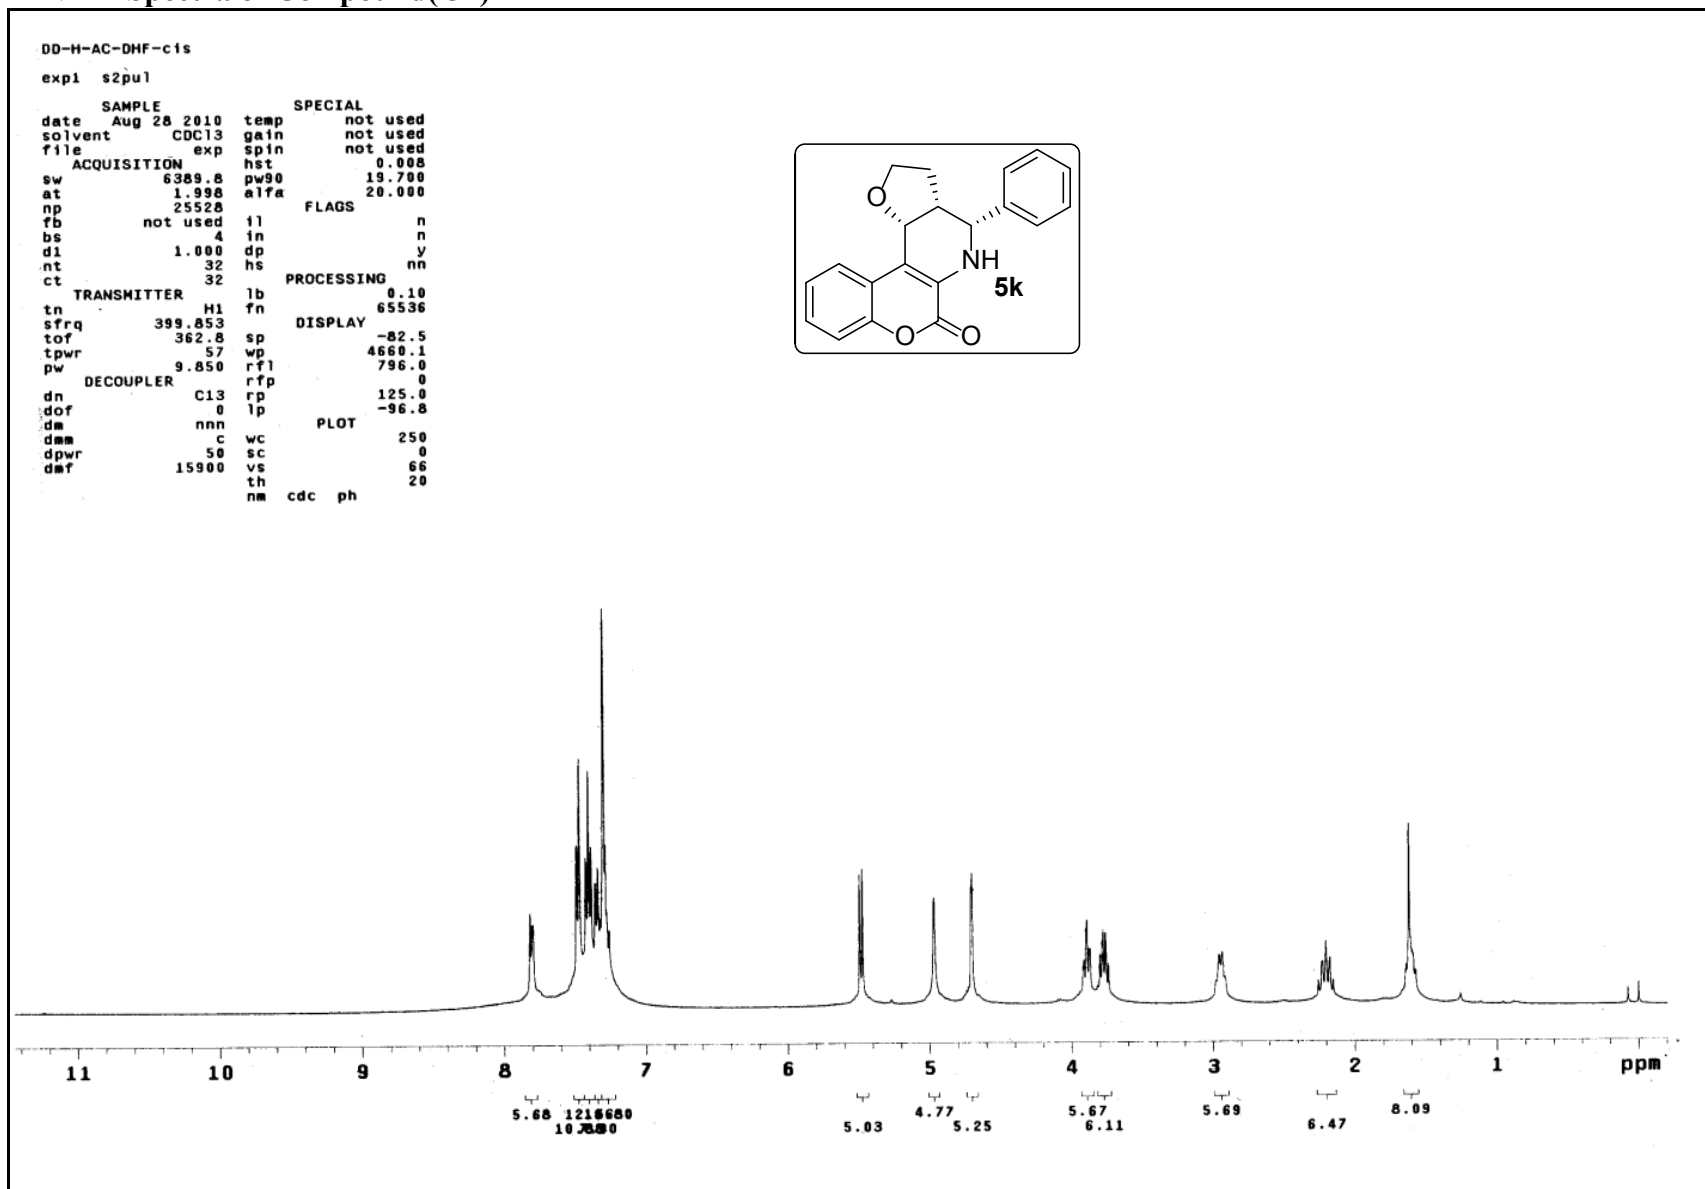



### <sup>13</sup>CNMR of Compound (5k)

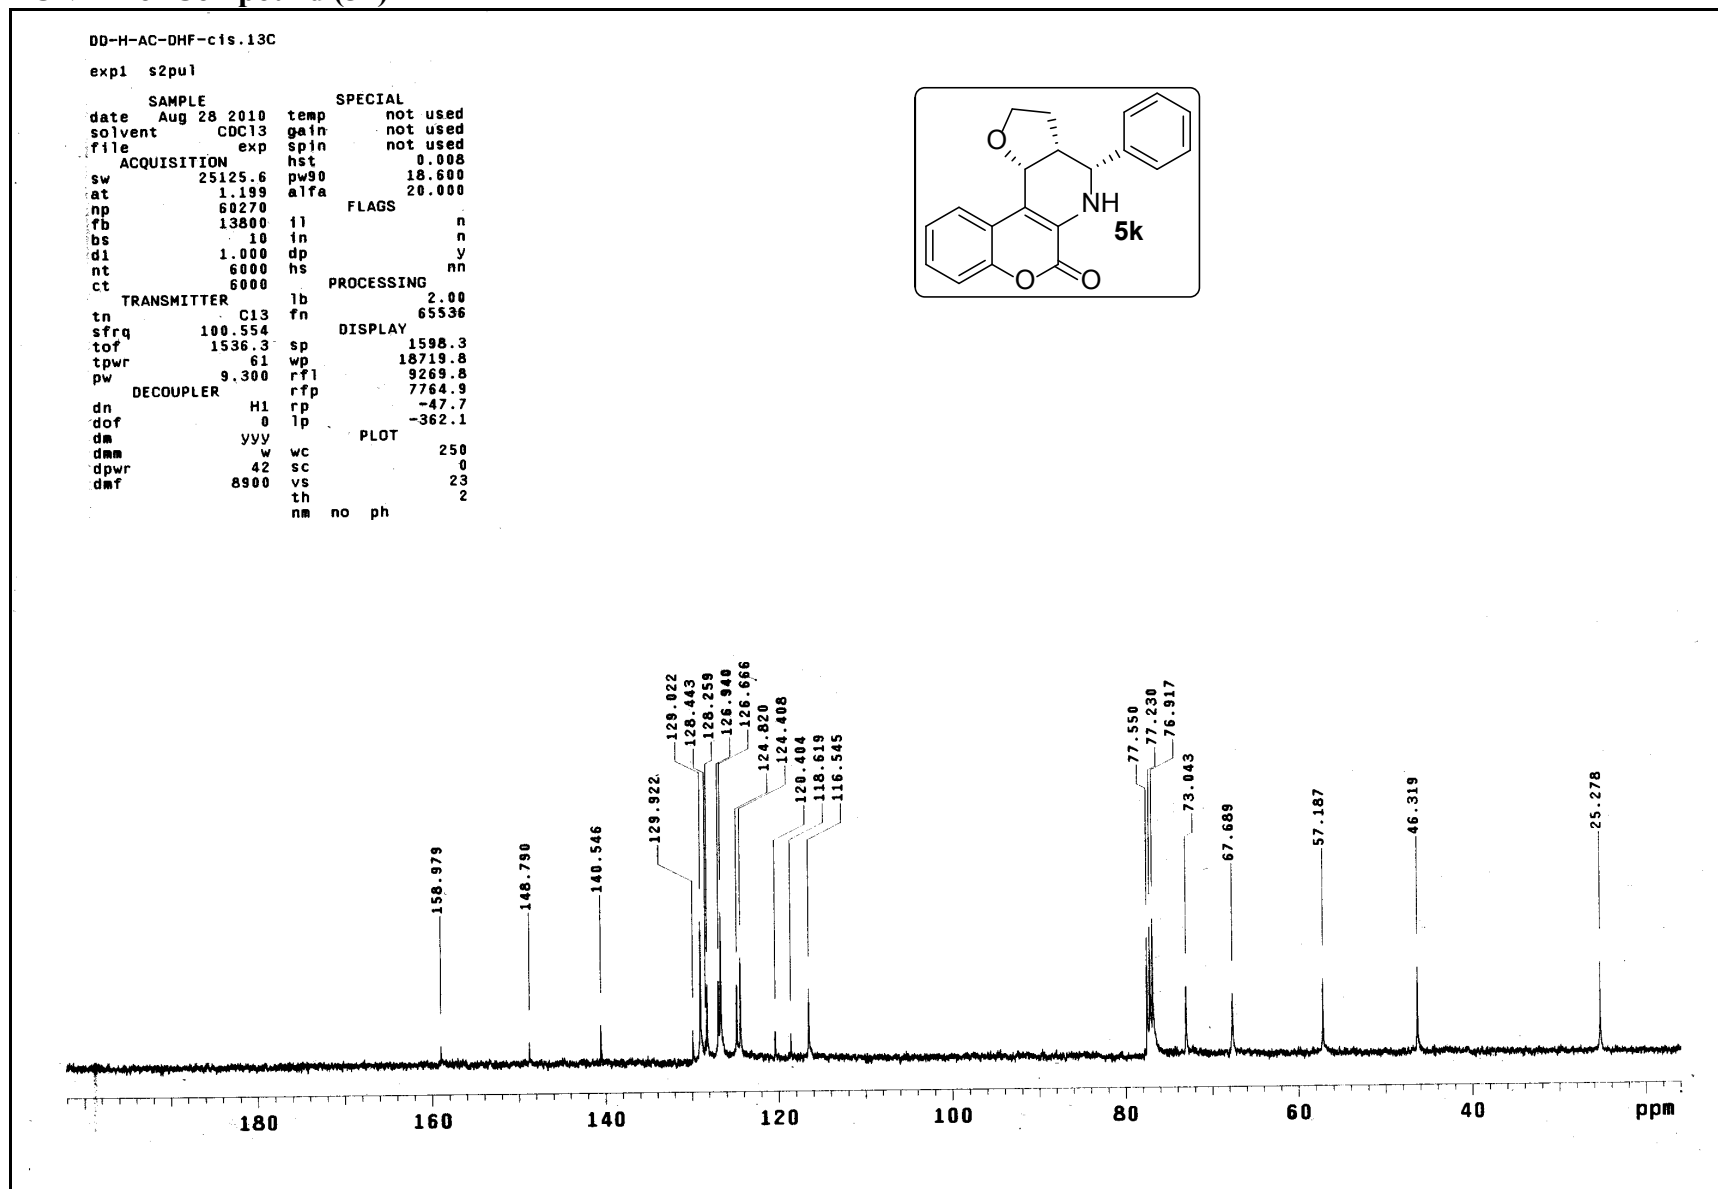

### <sup>1</sup>HNMR Spectra of Compound (4I)

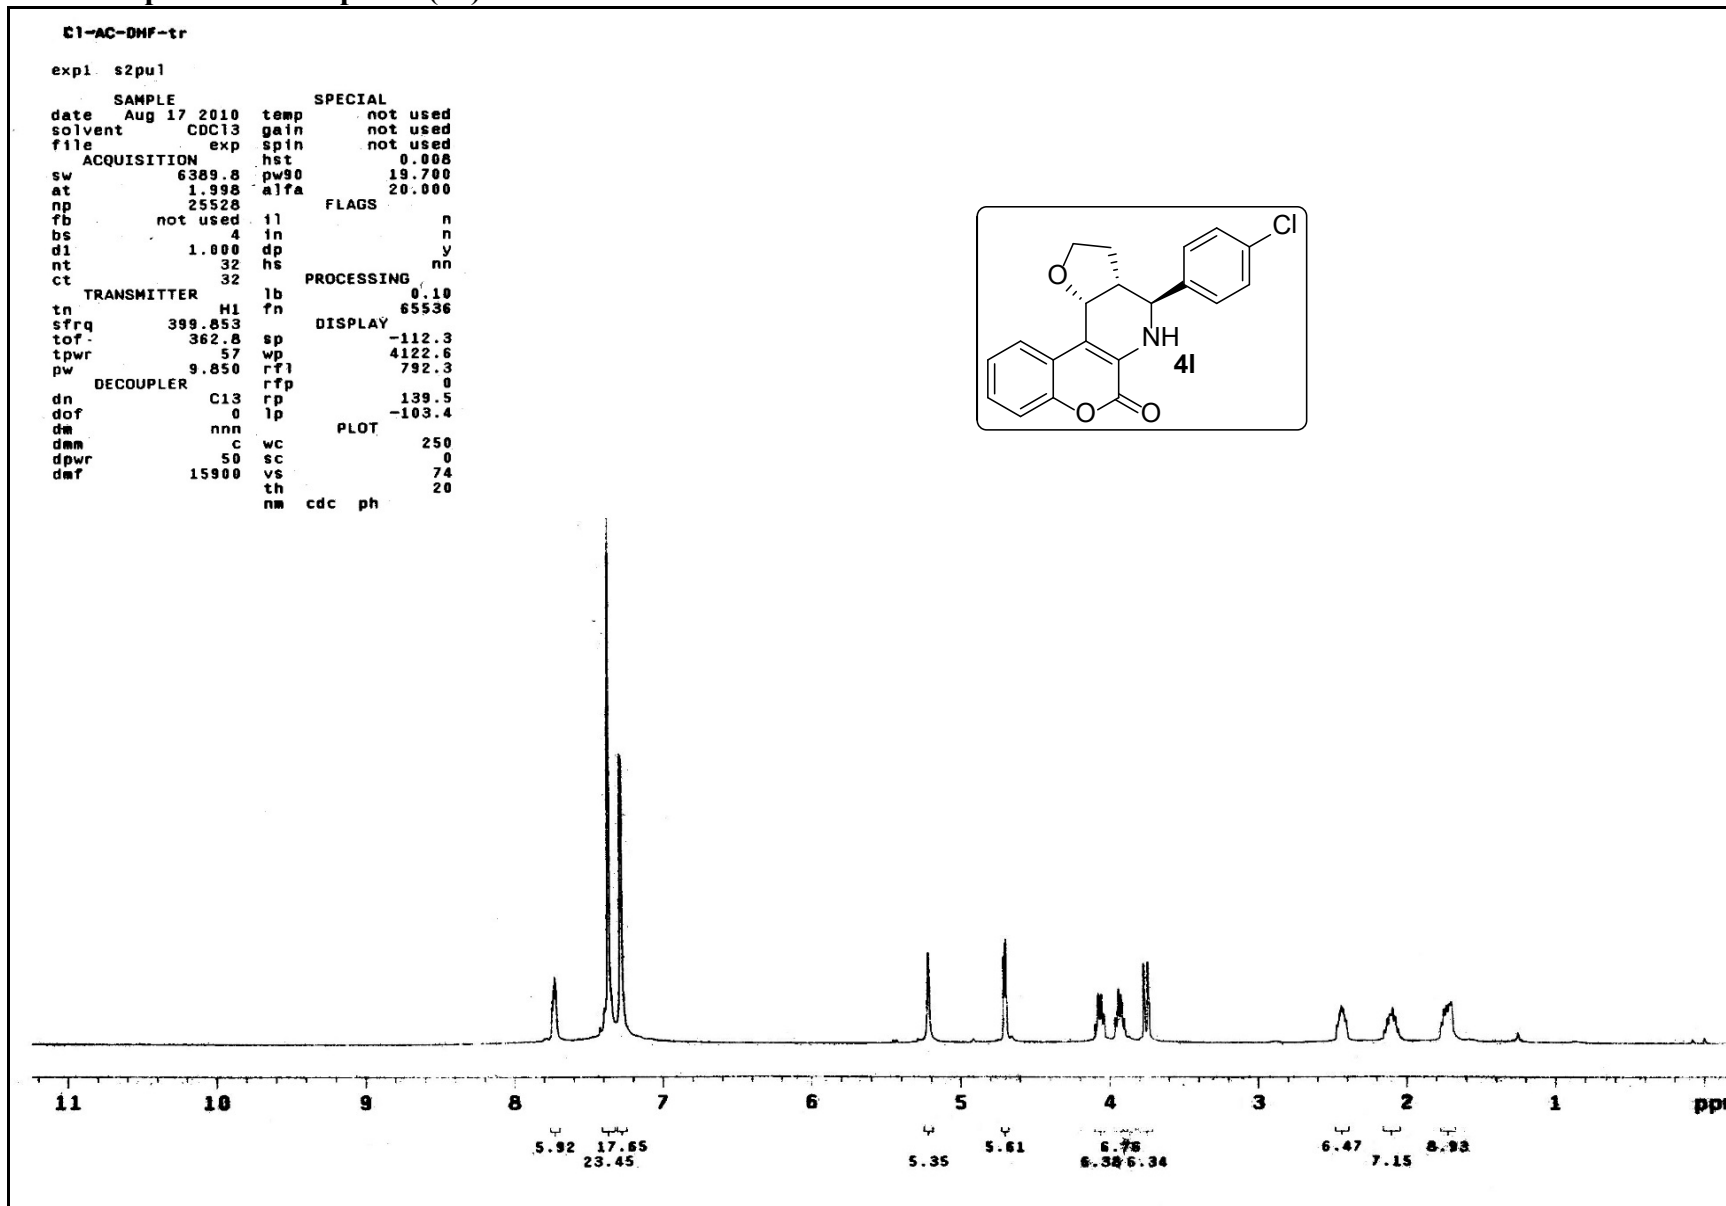

### <sup>13</sup>CNMR of Compound (4l)

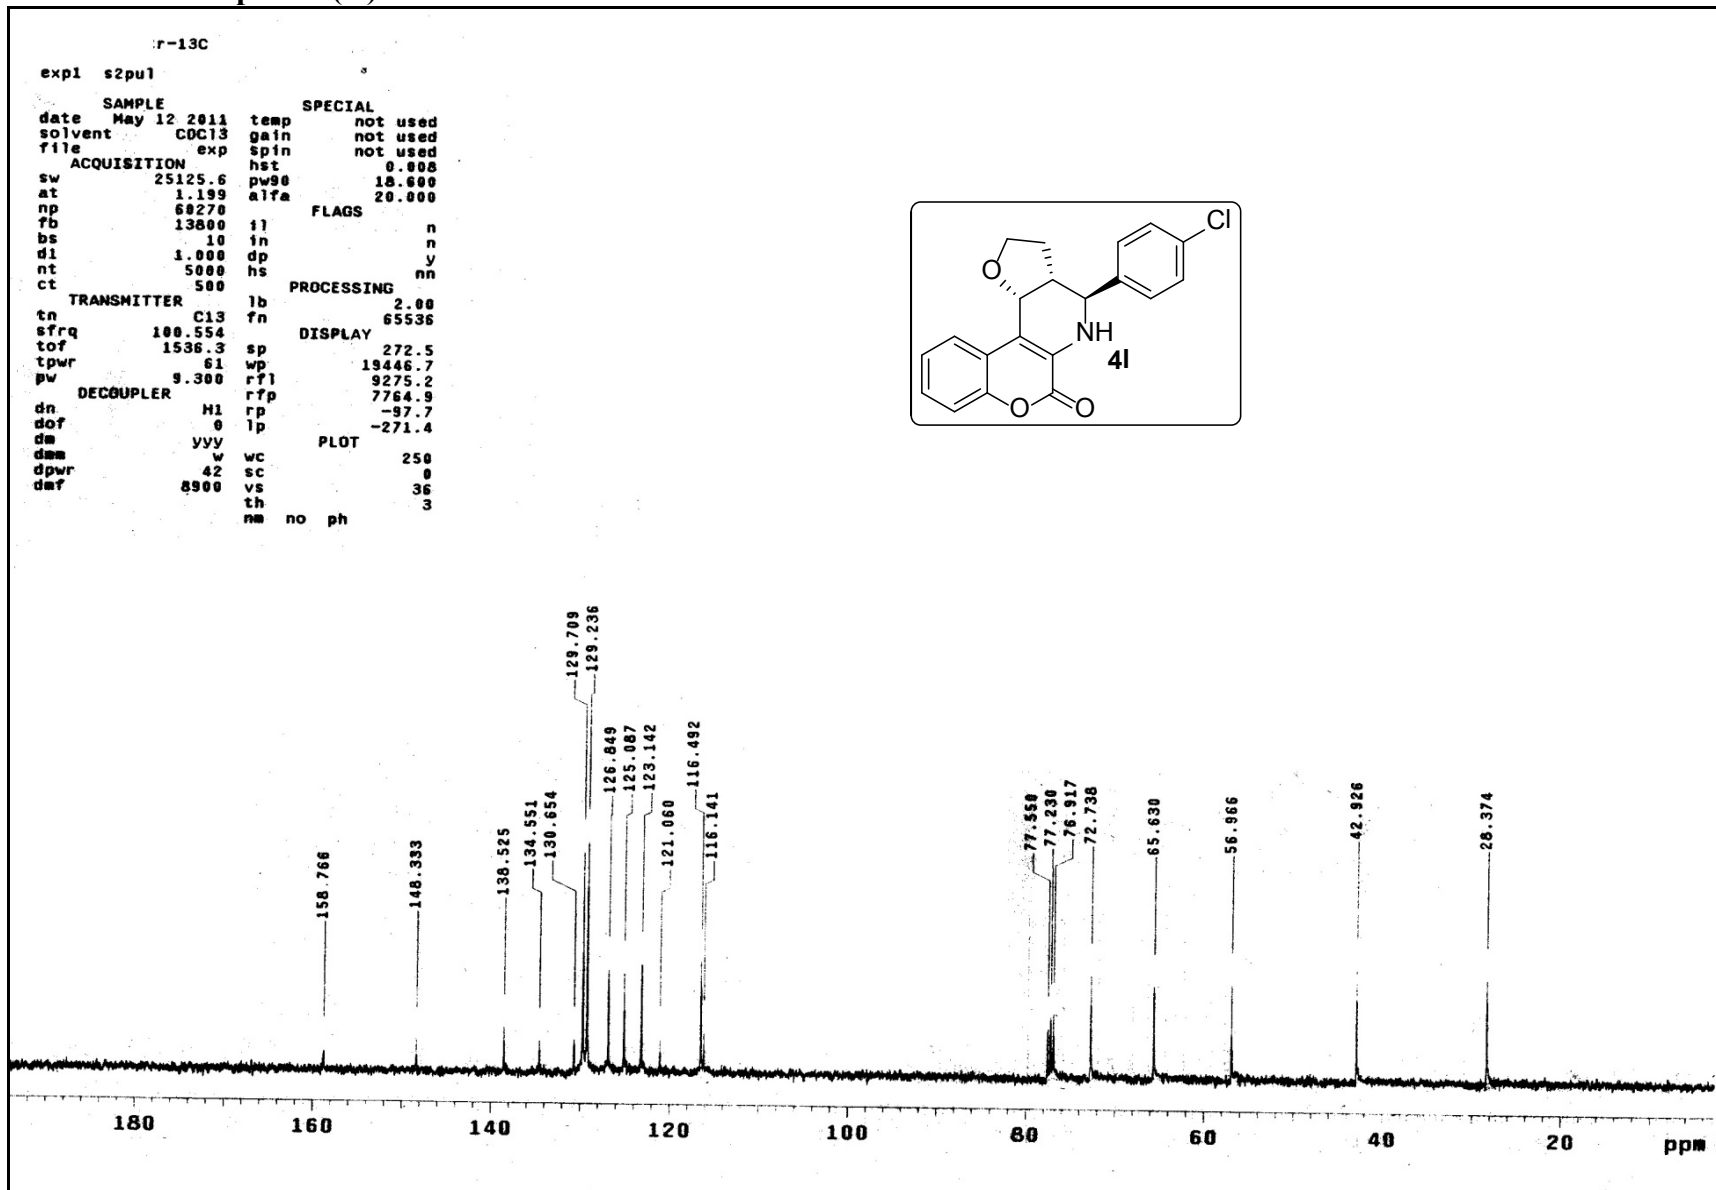

### <sup>1</sup>H NMR Spectra of Compound (5I)

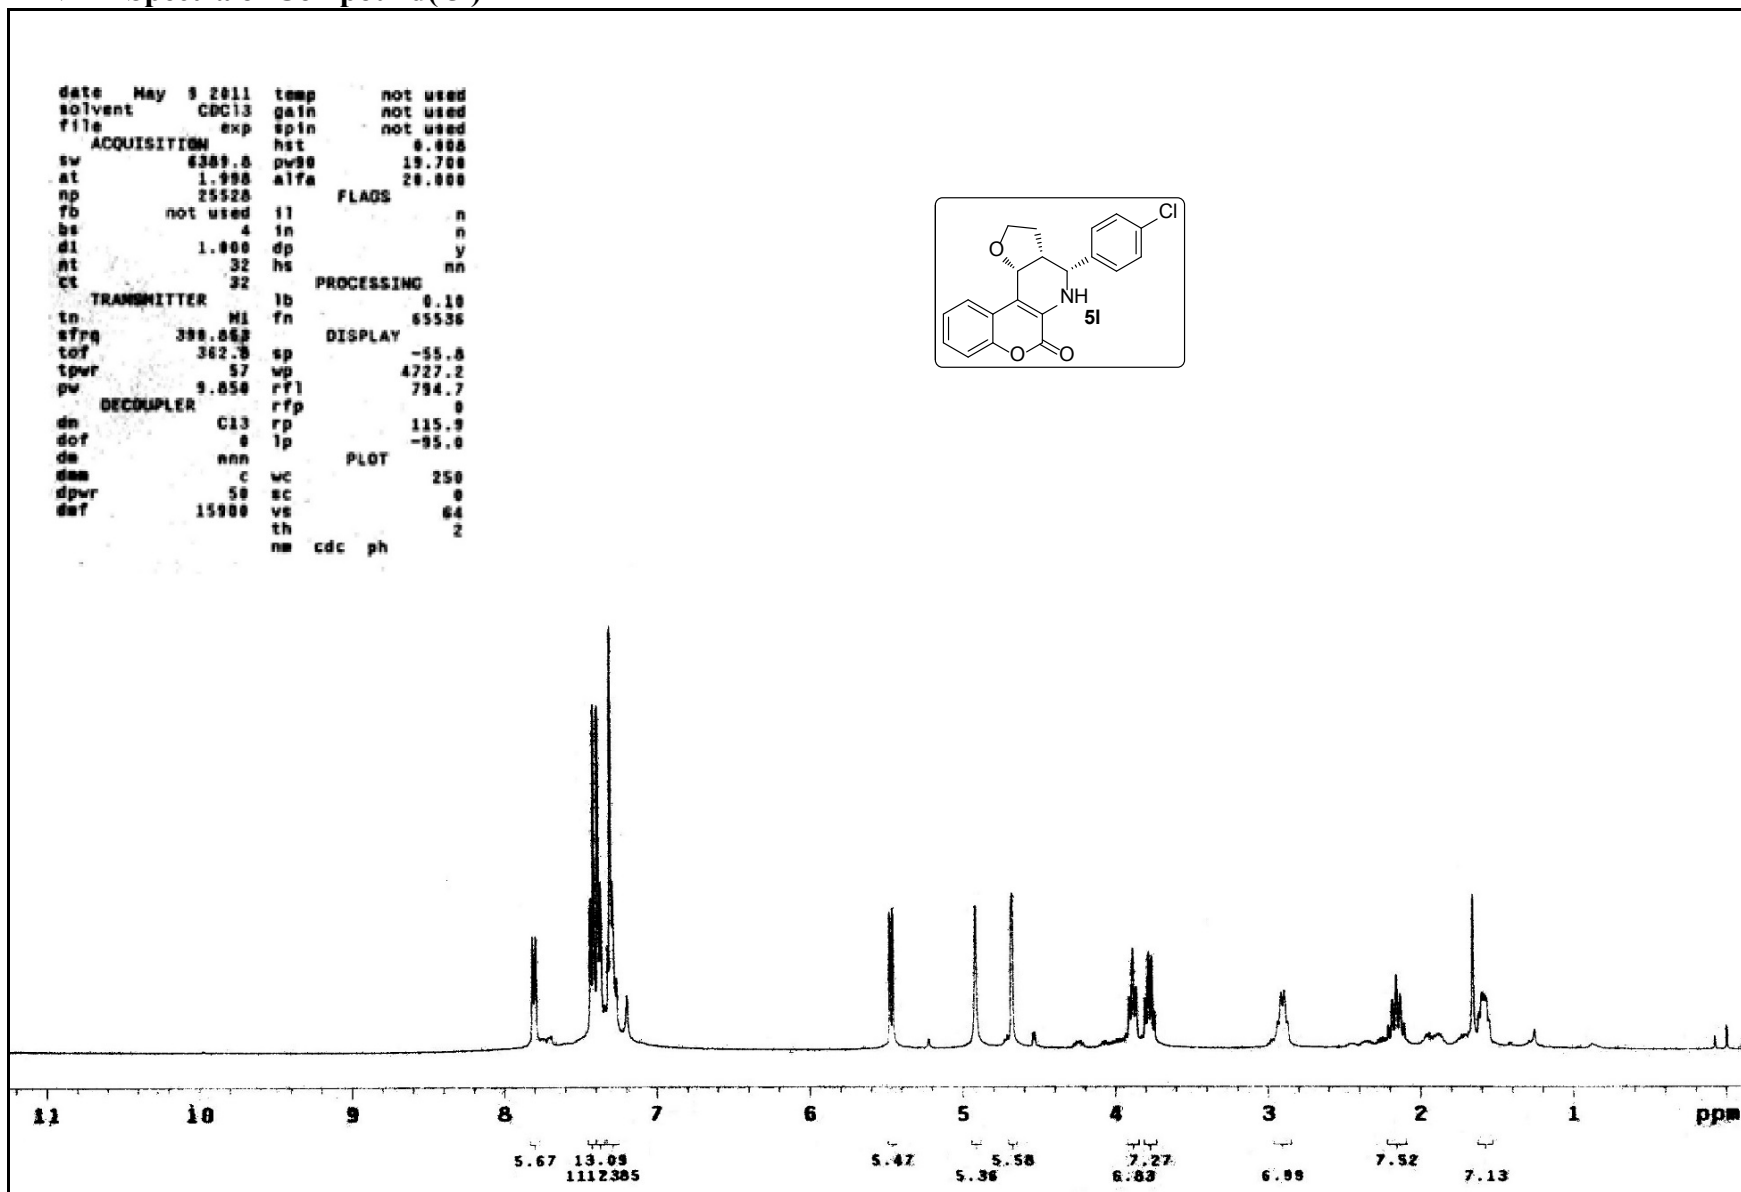

## HRMS of Compound (I)

|               |            |             |        |                 |              |                        |                       |
|---------------|------------|-------------|--------|-----------------|--------------|------------------------|-----------------------|
| Sample Name   | CLAC_DHF   | Position    | Vial 1 | Instrument Name | Instrument 1 | User Name              |                       |
| Inj Vol       | -1         | InjPosition |        | Sample Type     | Sample       | IRM Calibration Status | All Ions Missed       |
| Data Filename | CLAC_DHF.d | ACQ Method  |        | Comment         |              | Acquired Time          | 8/10/2011 12:02:38 PM |

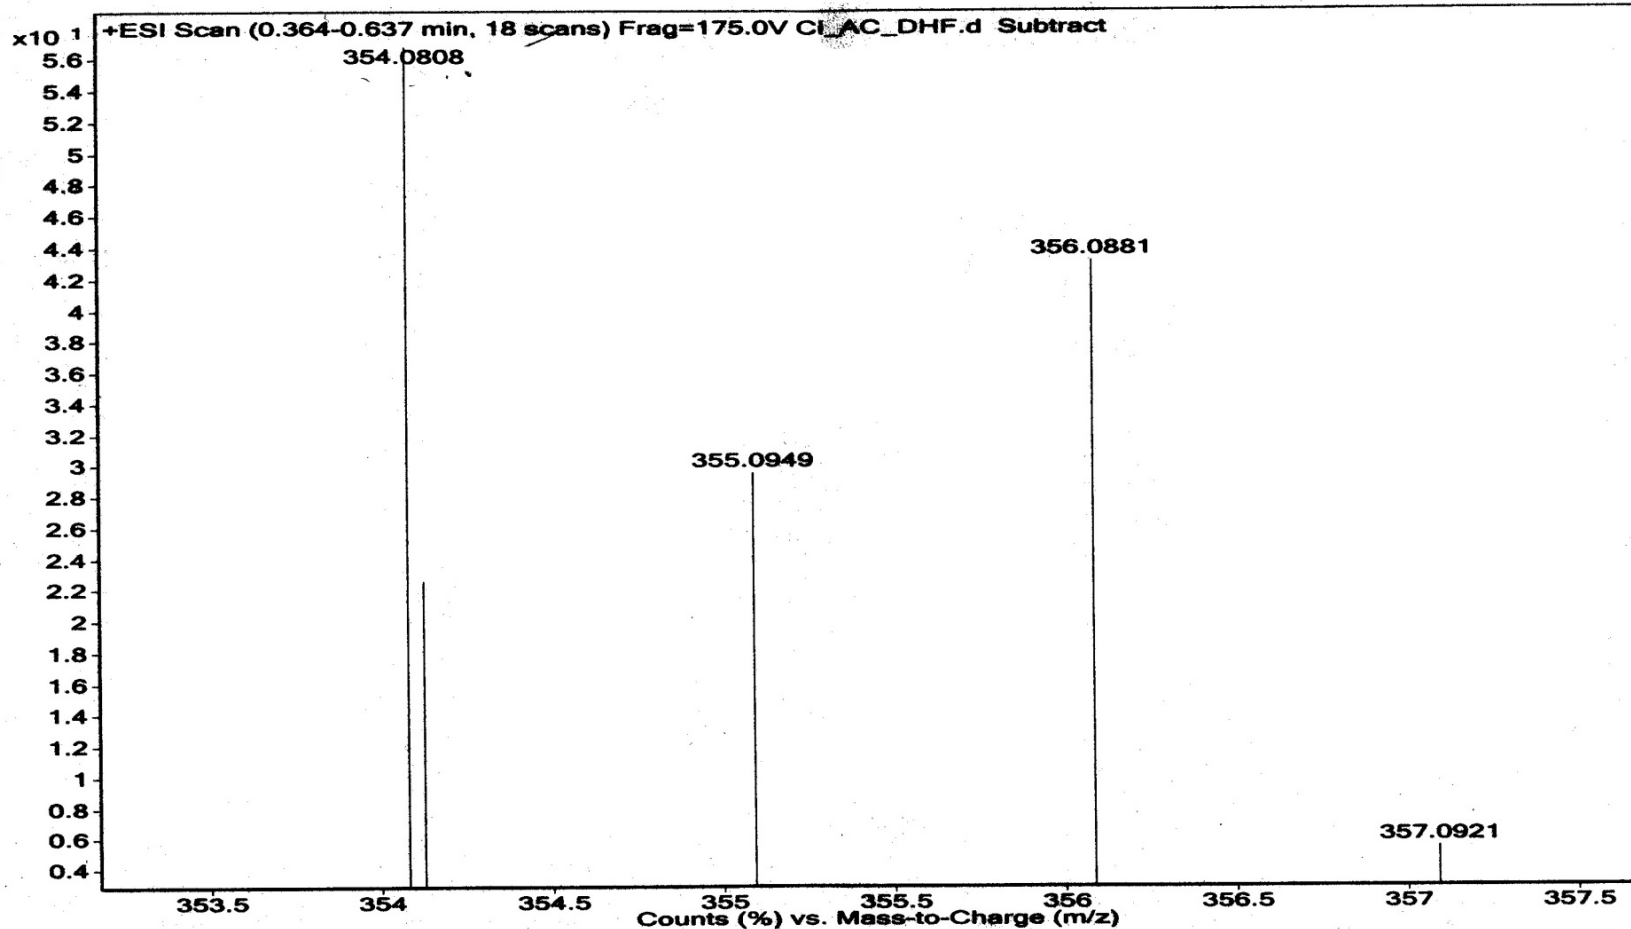

### Expansion $^1\text{H}$ NMR spectra for determining the trans : cis ratio for Compound (m)

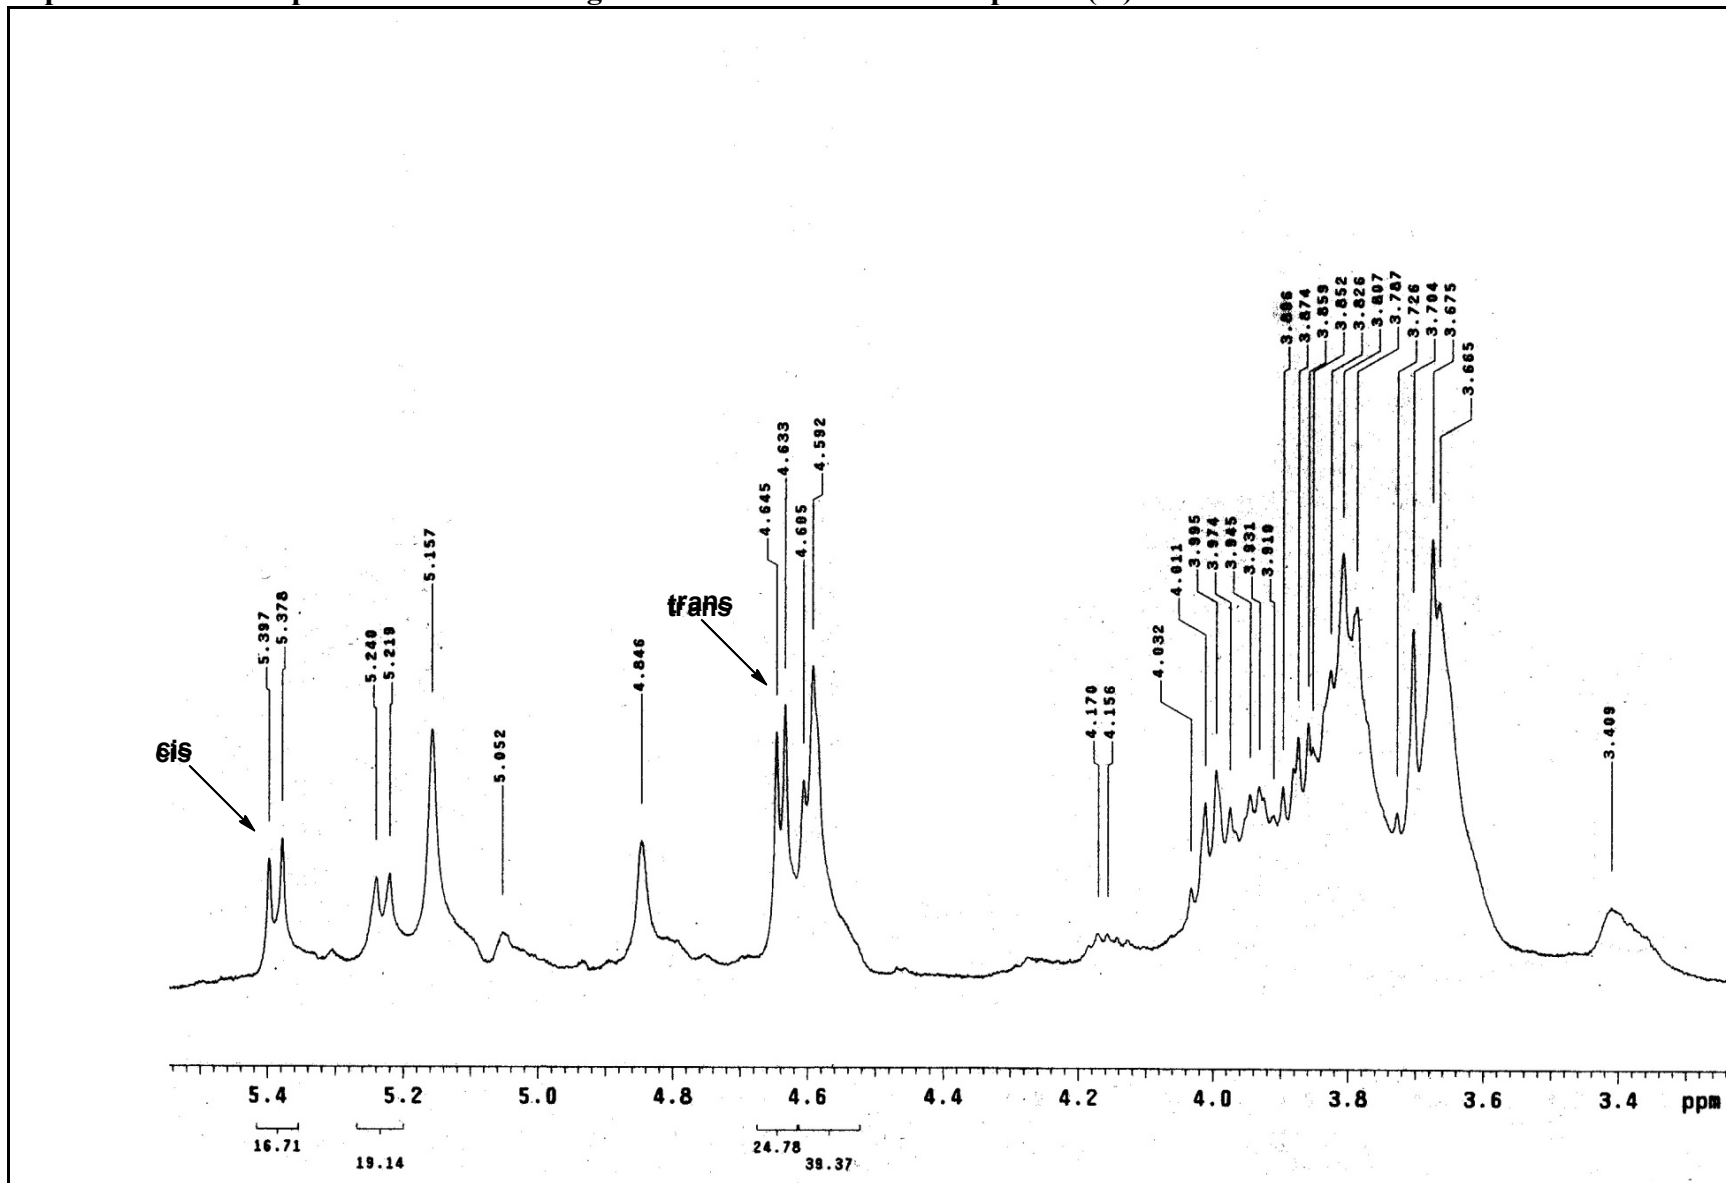

### <sup>1</sup>H NMR Spectra of Compound (4m)

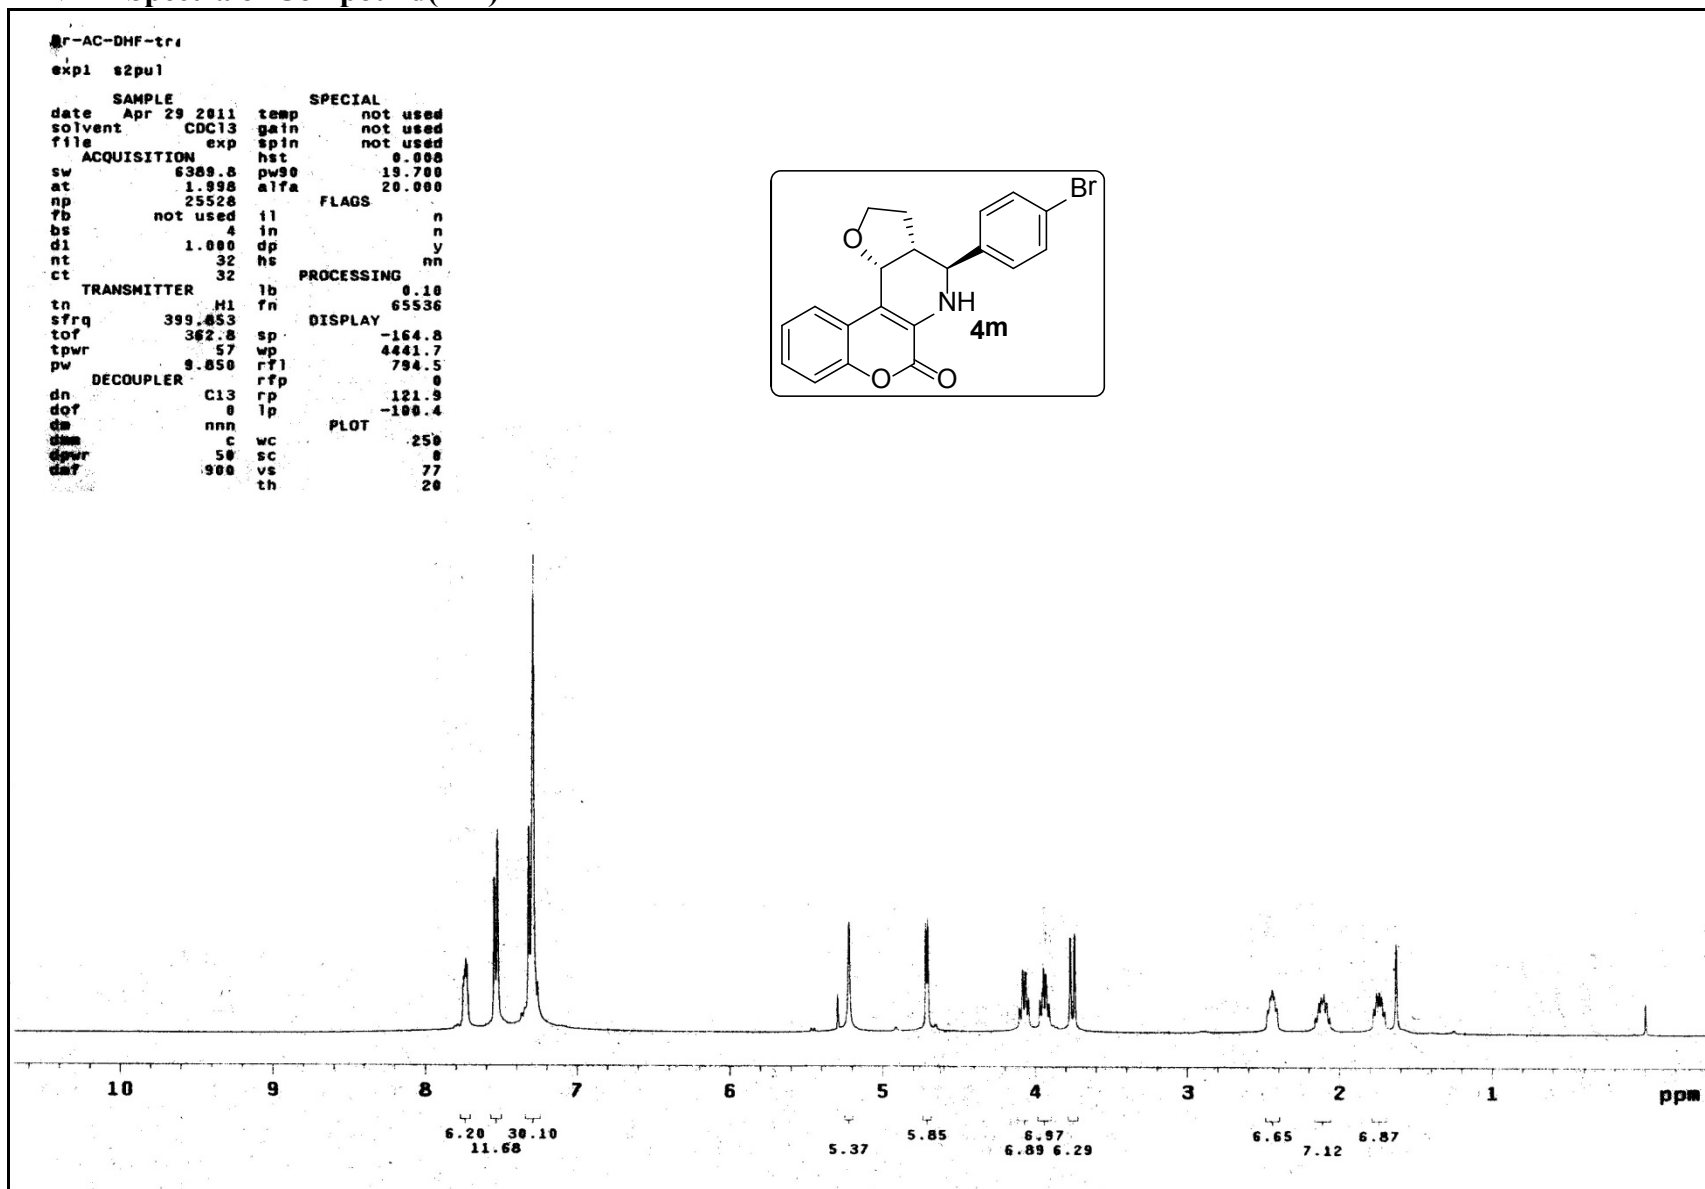

### <sup>13</sup>CNMR of Compound (4m)

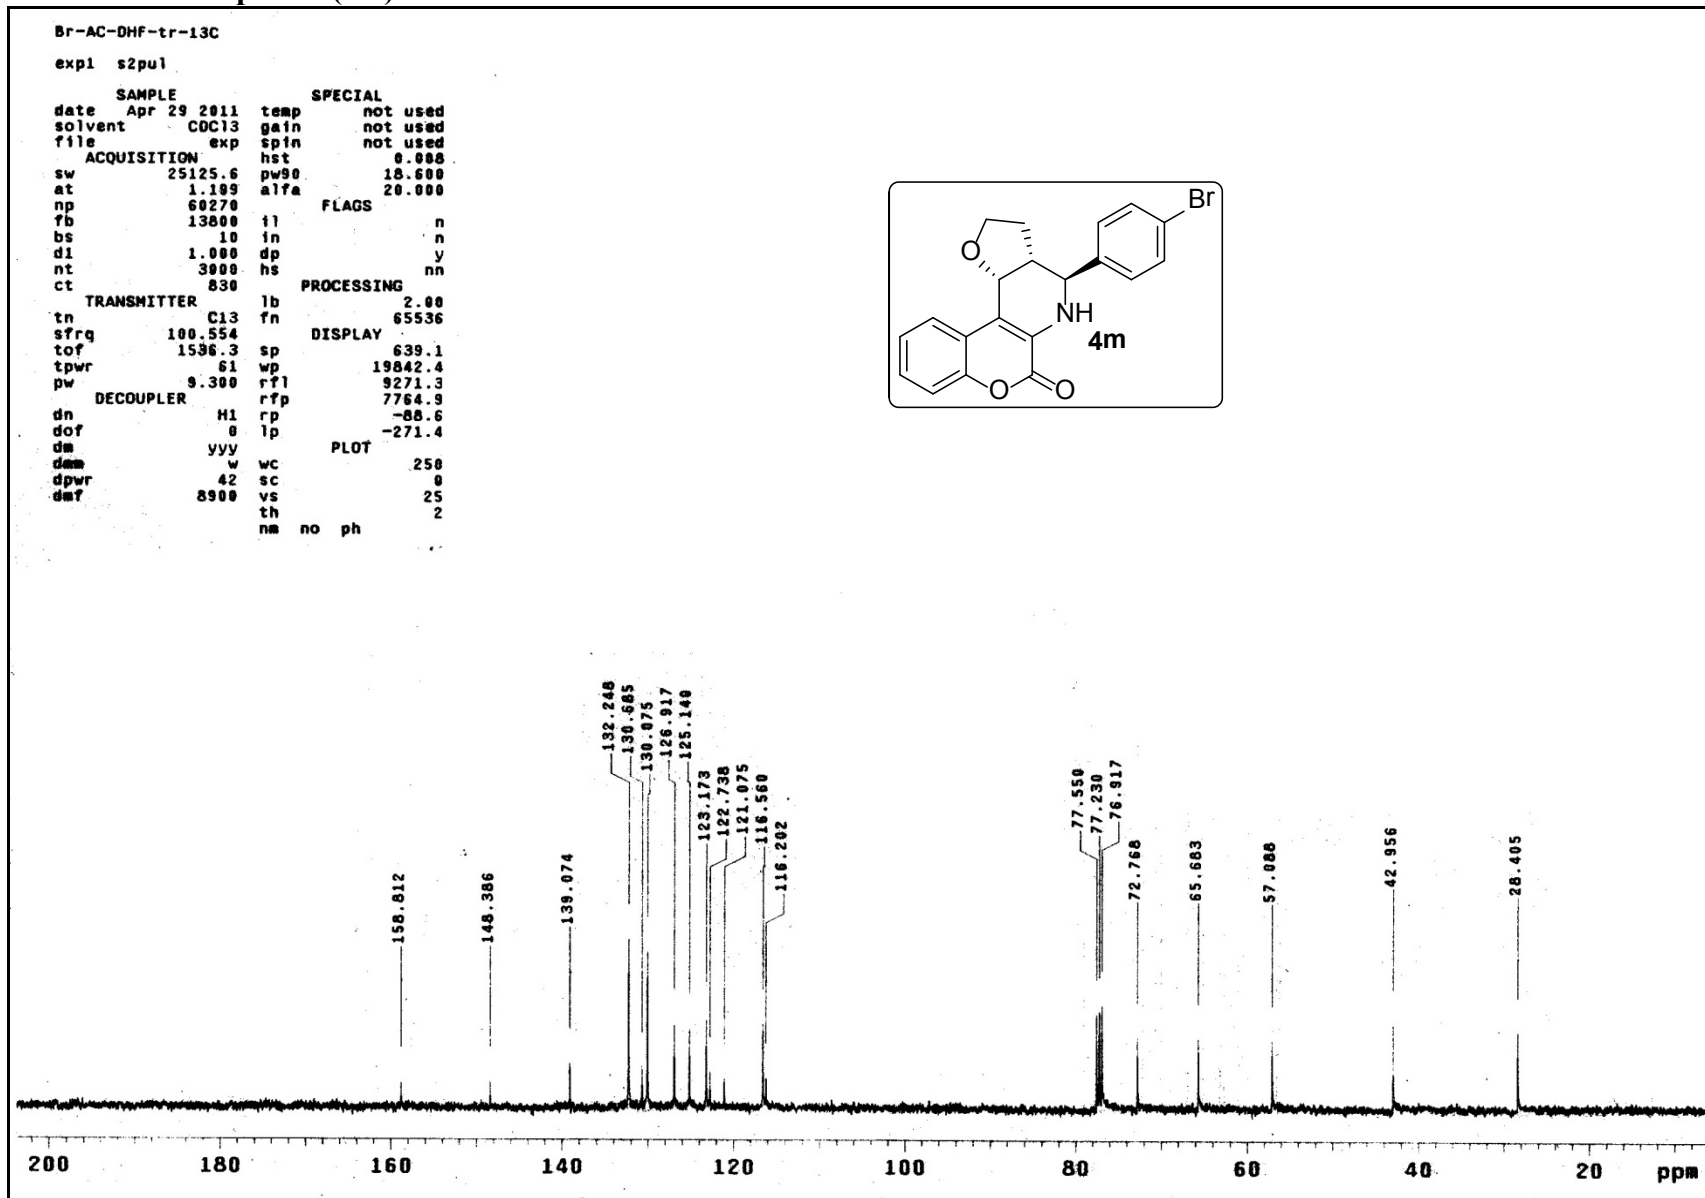



# <sup>1</sup>H NMR Spectra of Compound (5m)

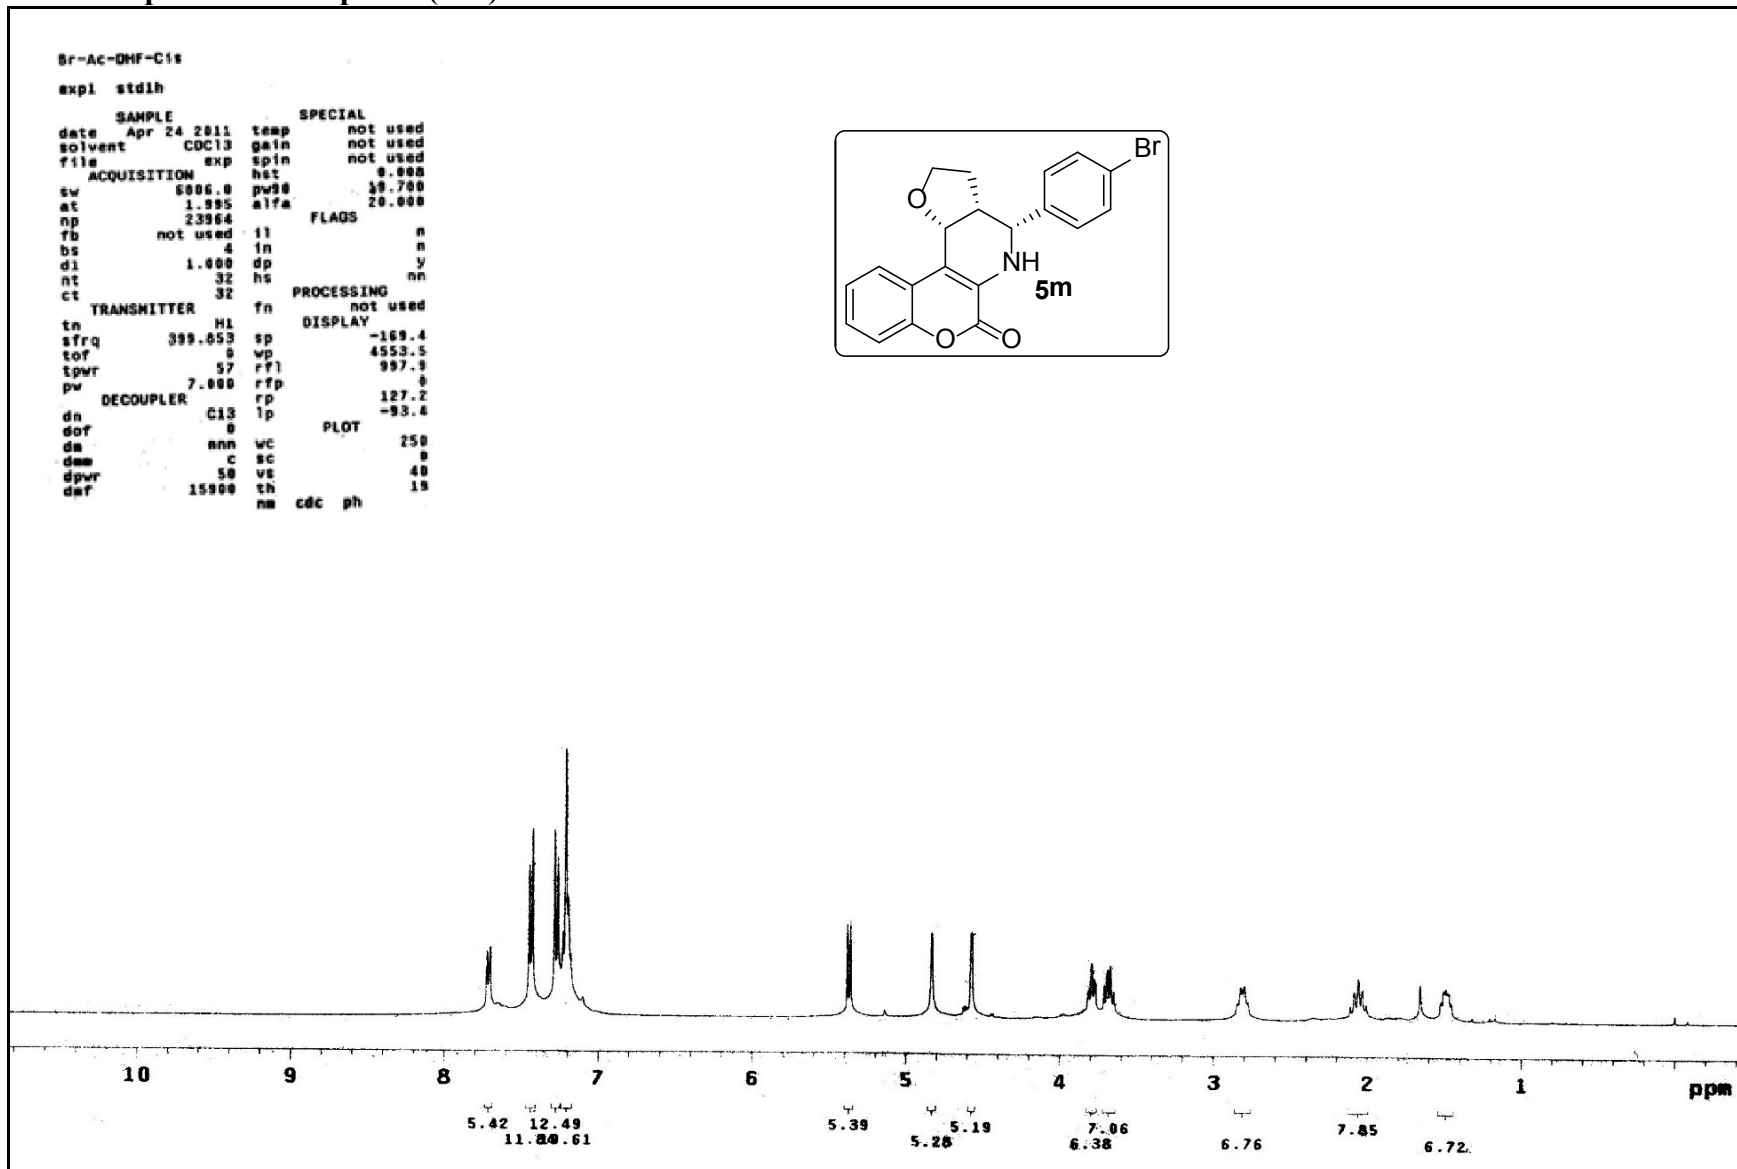

### <sup>13</sup>CNMR of Compound (5m)

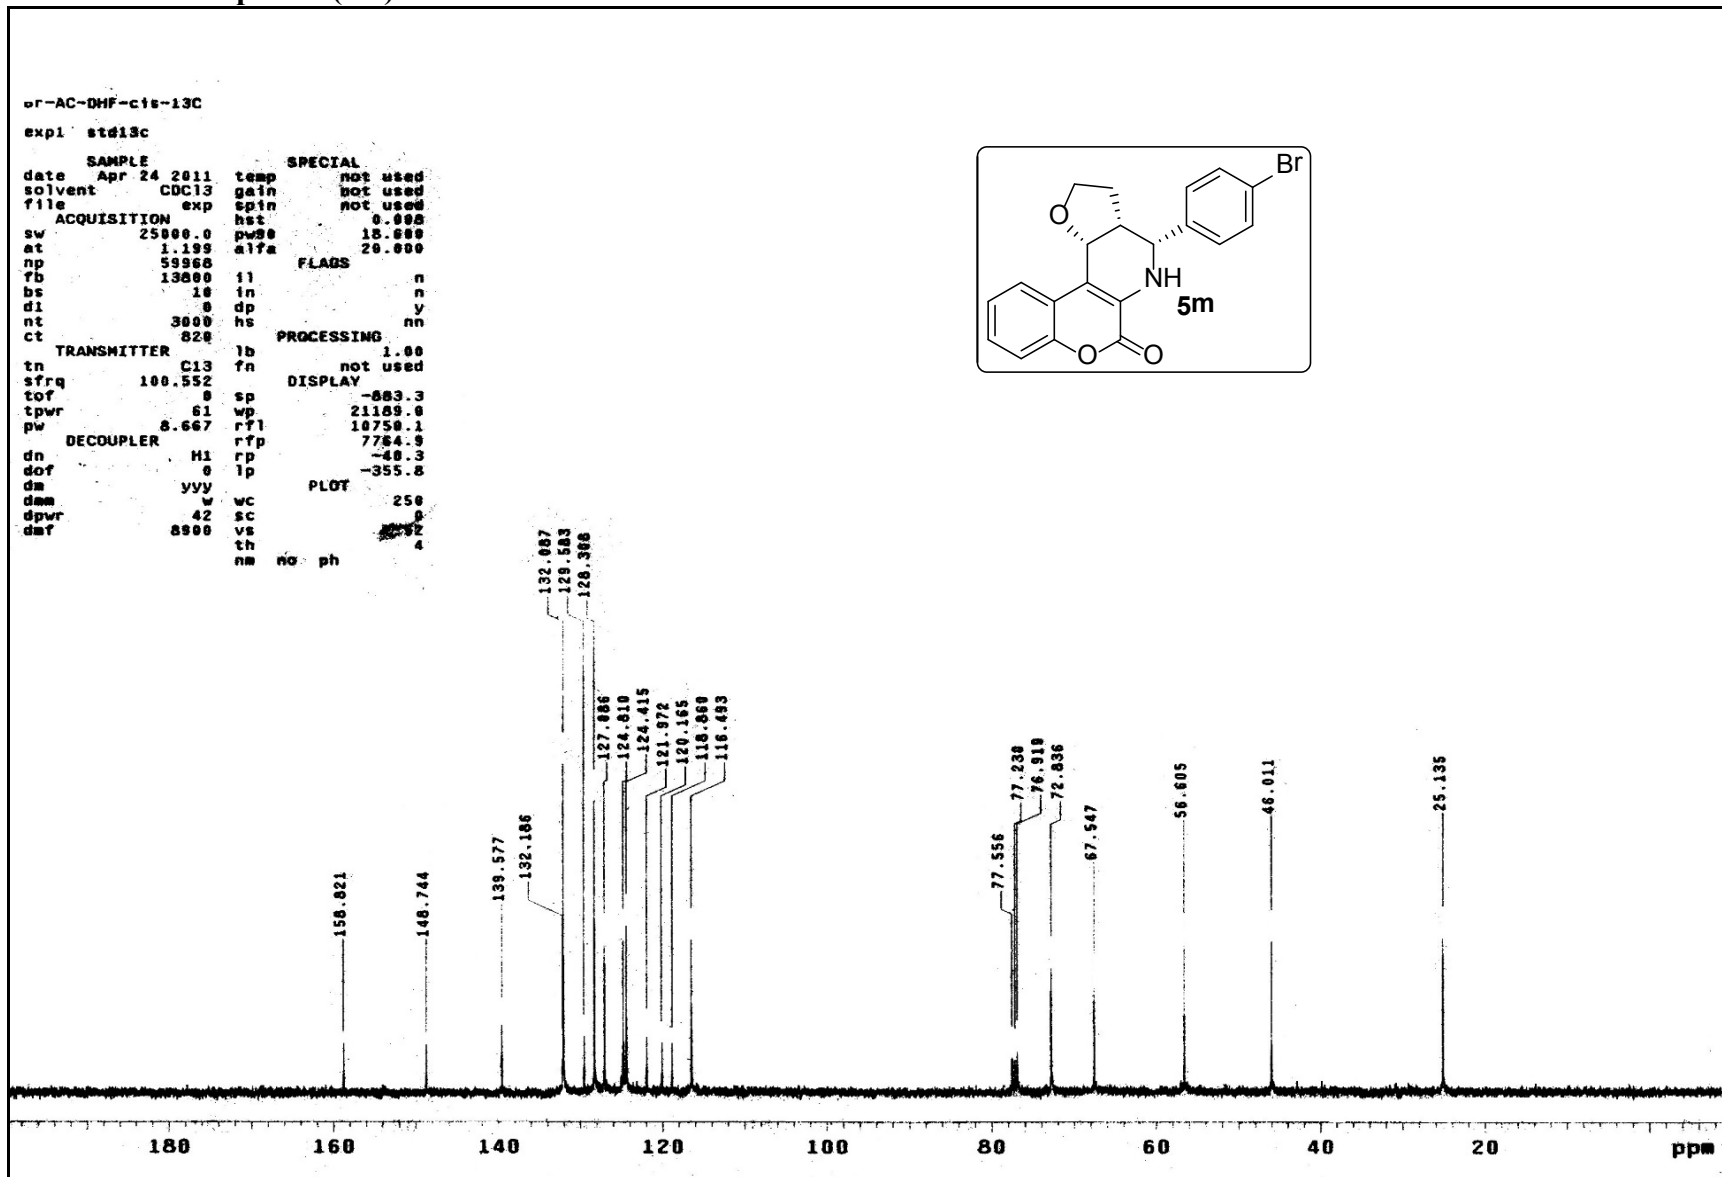

Expansion  $^1\text{H}$ NMR spectra for determining the trans : cis ratio for Compound (n)

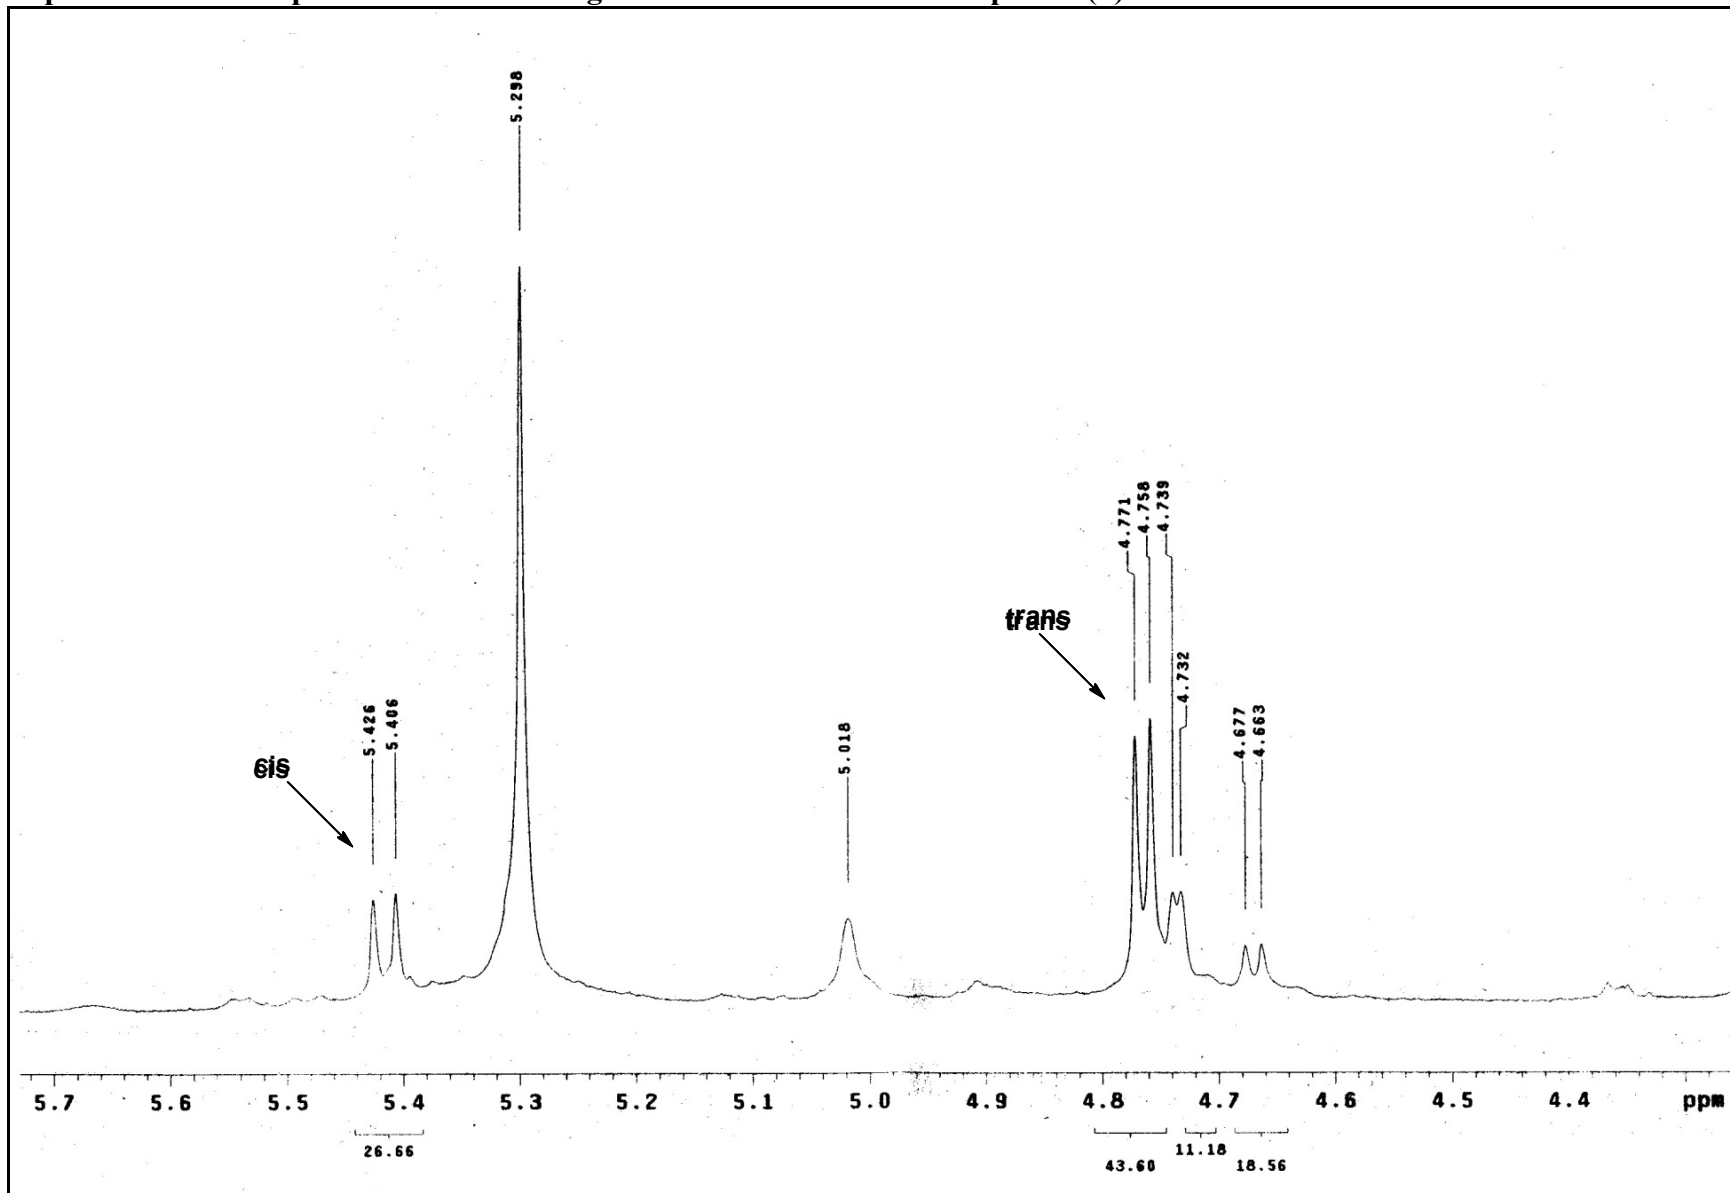

### <sup>1</sup>H NMR Spectra of Compound (4n)

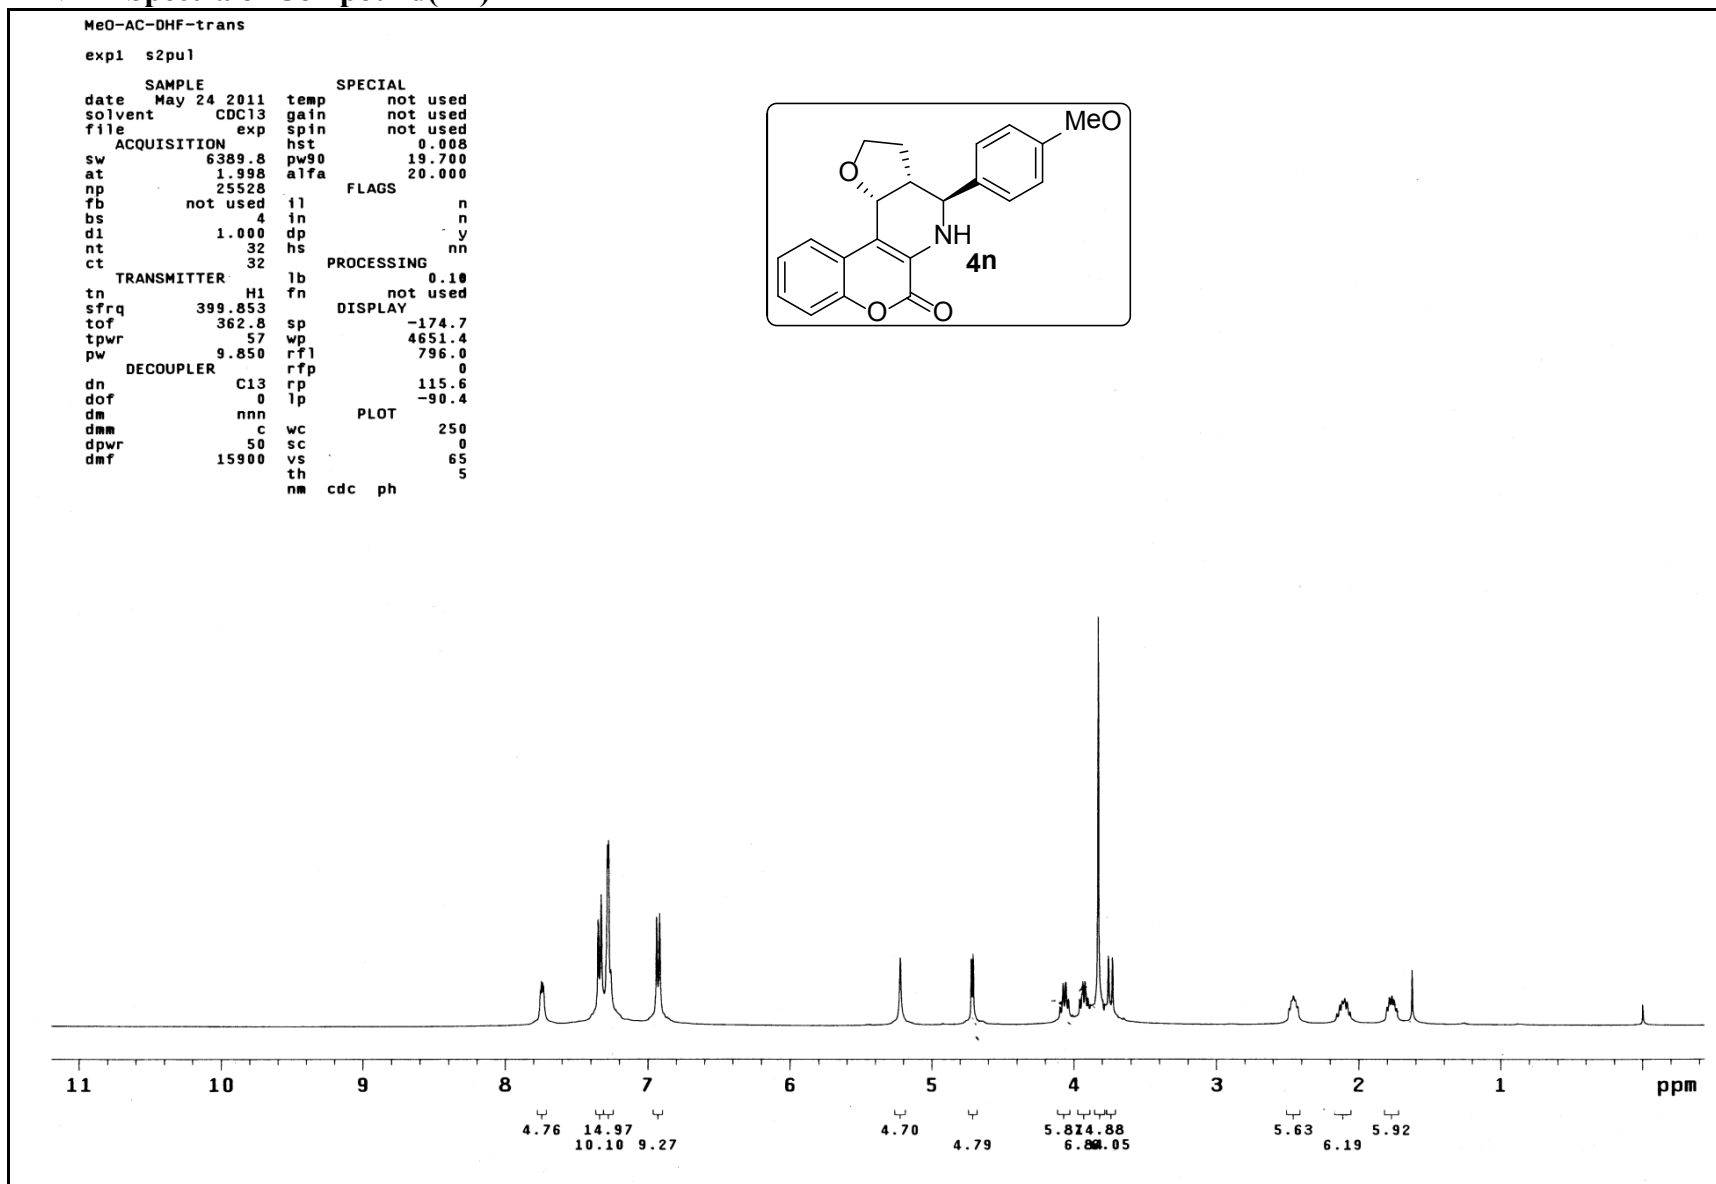

### <sup>13</sup>CNMR of Compound (4n)

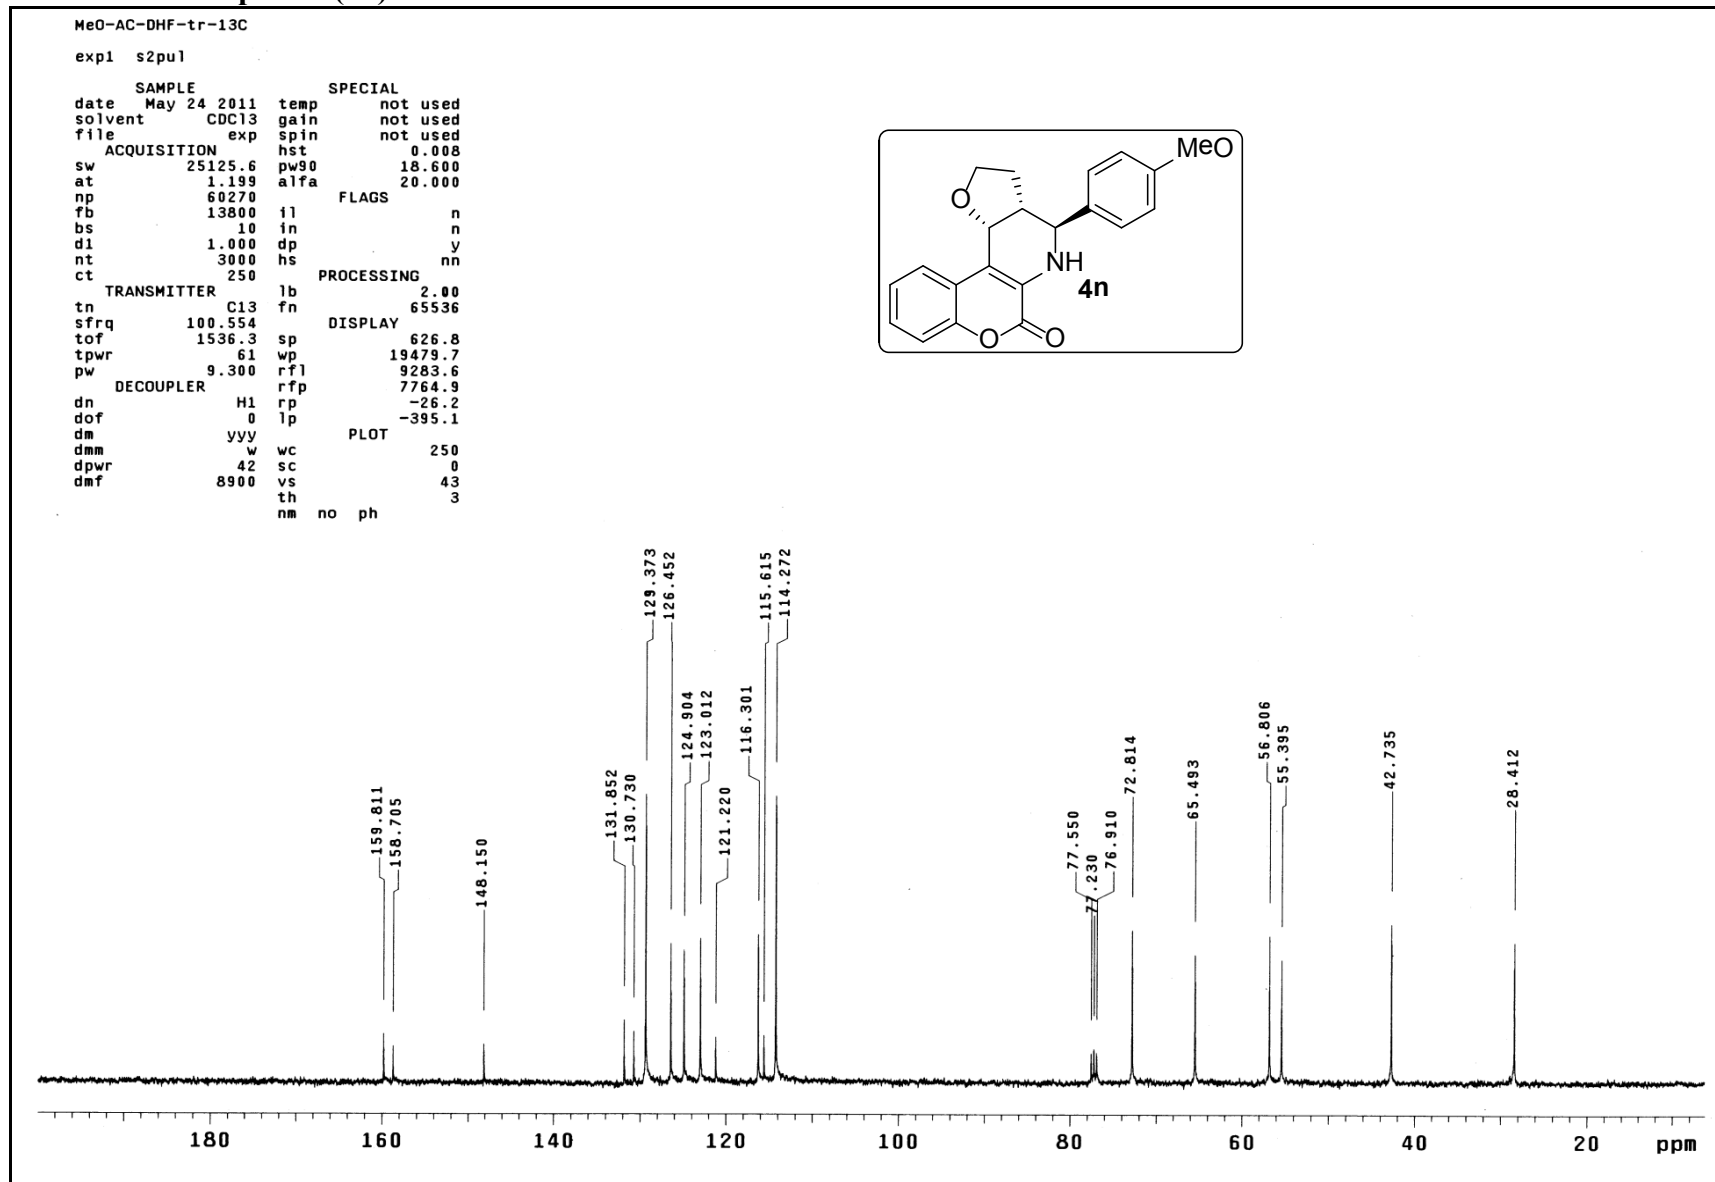

# <sup>1</sup>H NMR Spectra of Compound (4o)

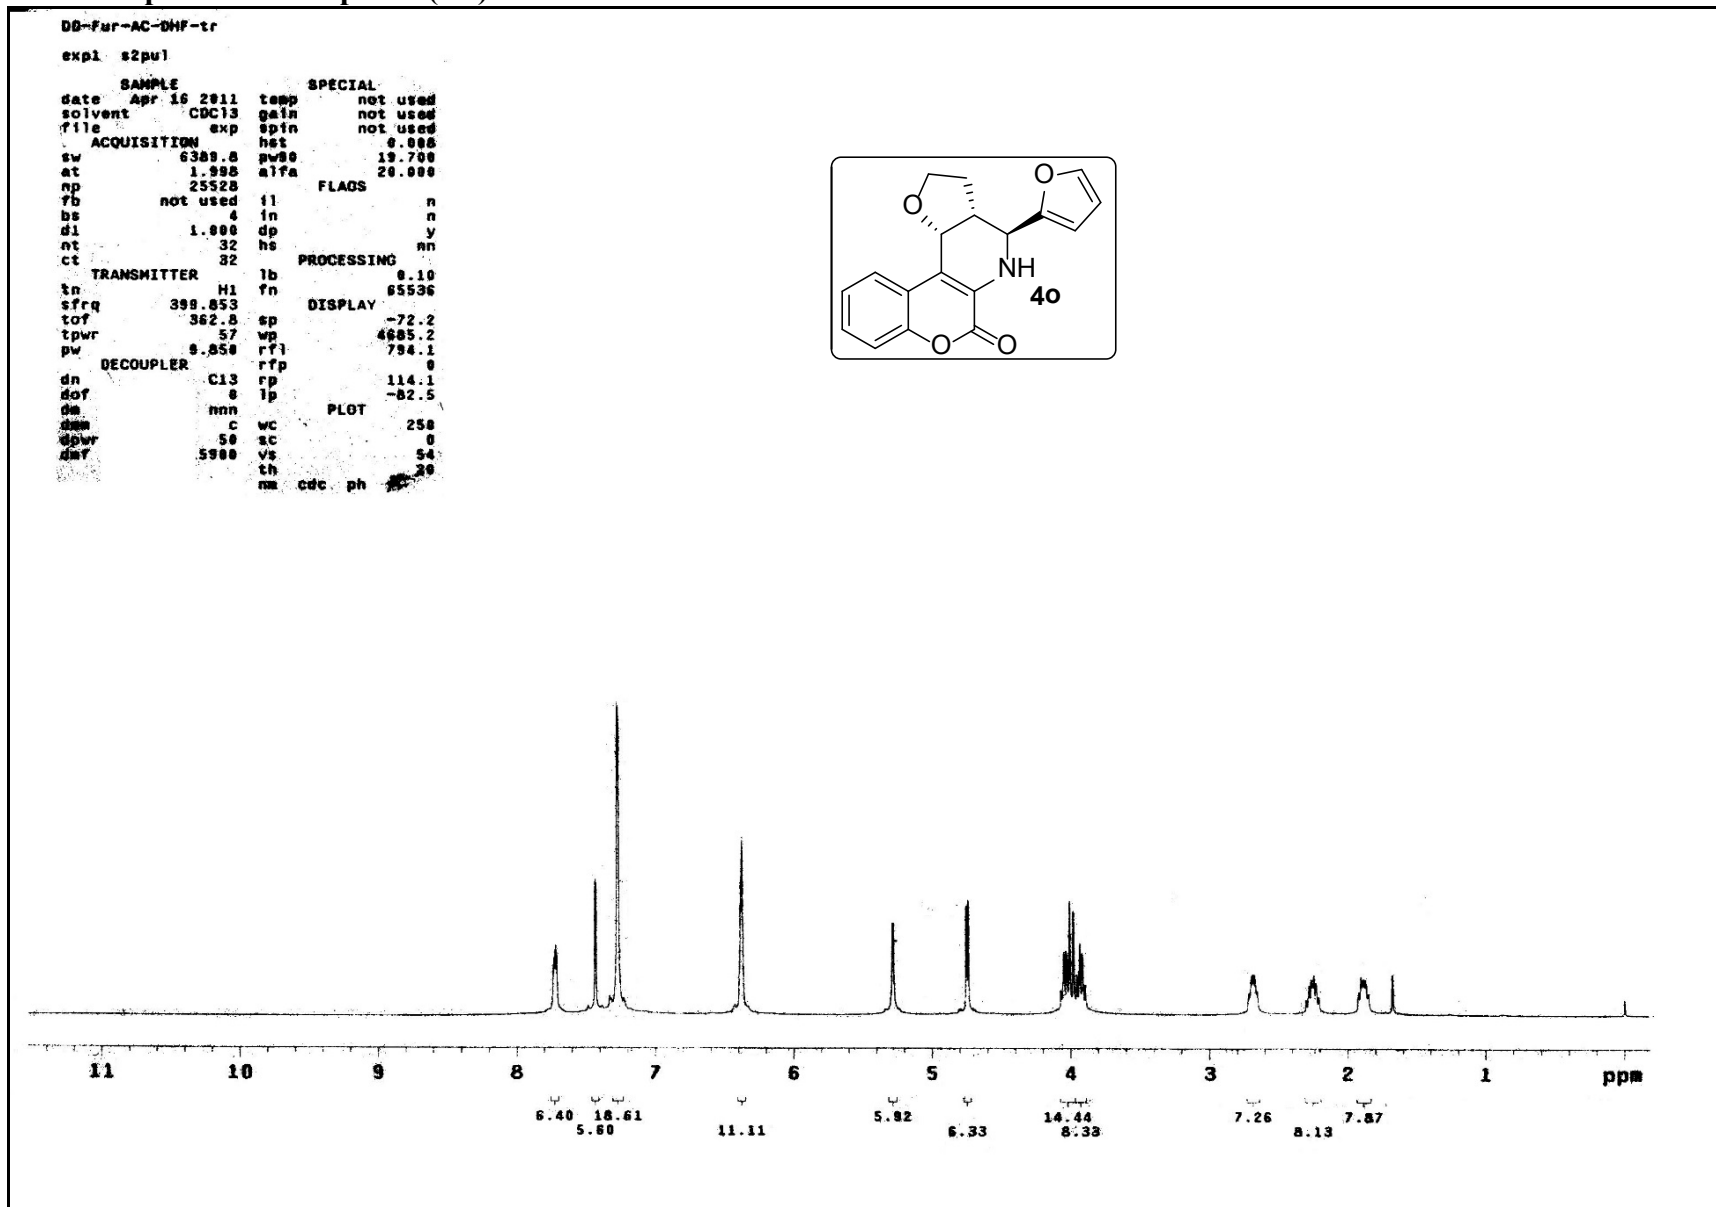

### <sup>13</sup>CNMR of Compound (4o)

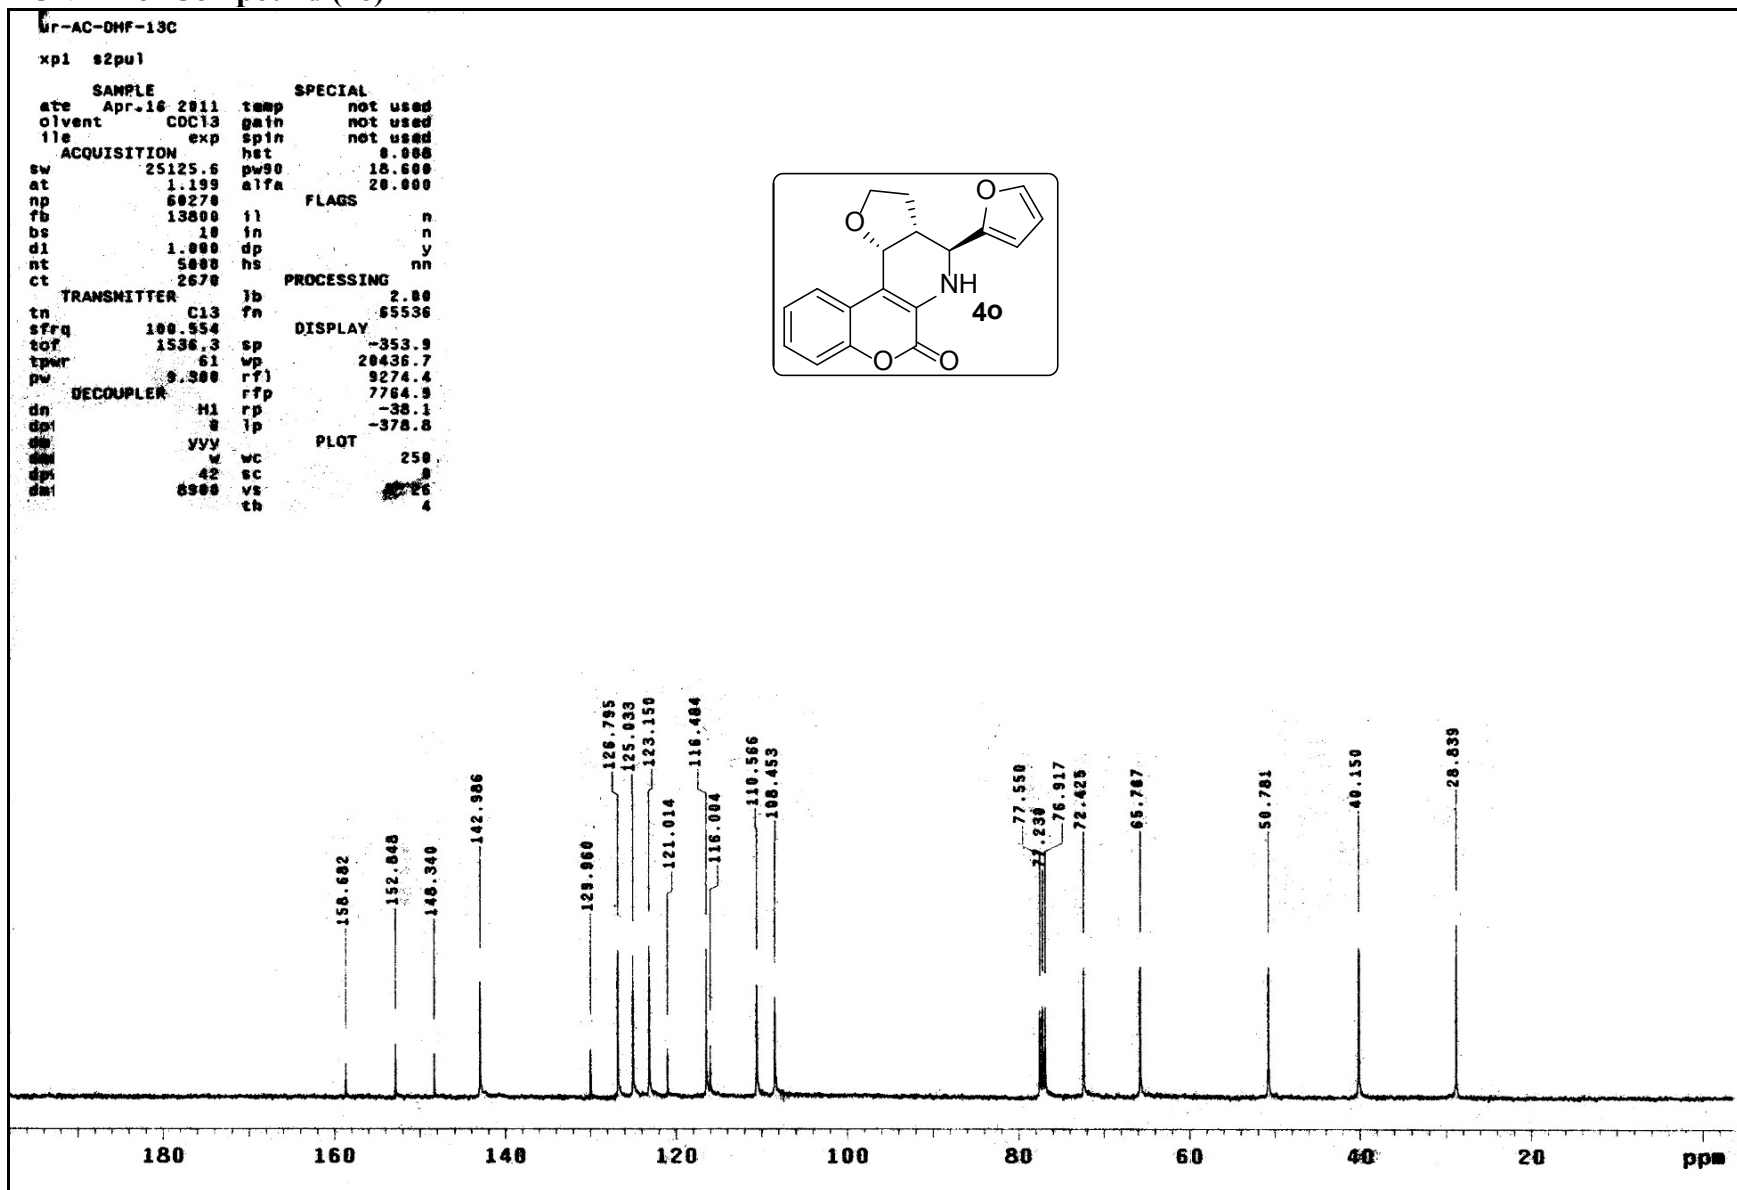

# <sup>1</sup>H NMR Spectra of Compound (5o)

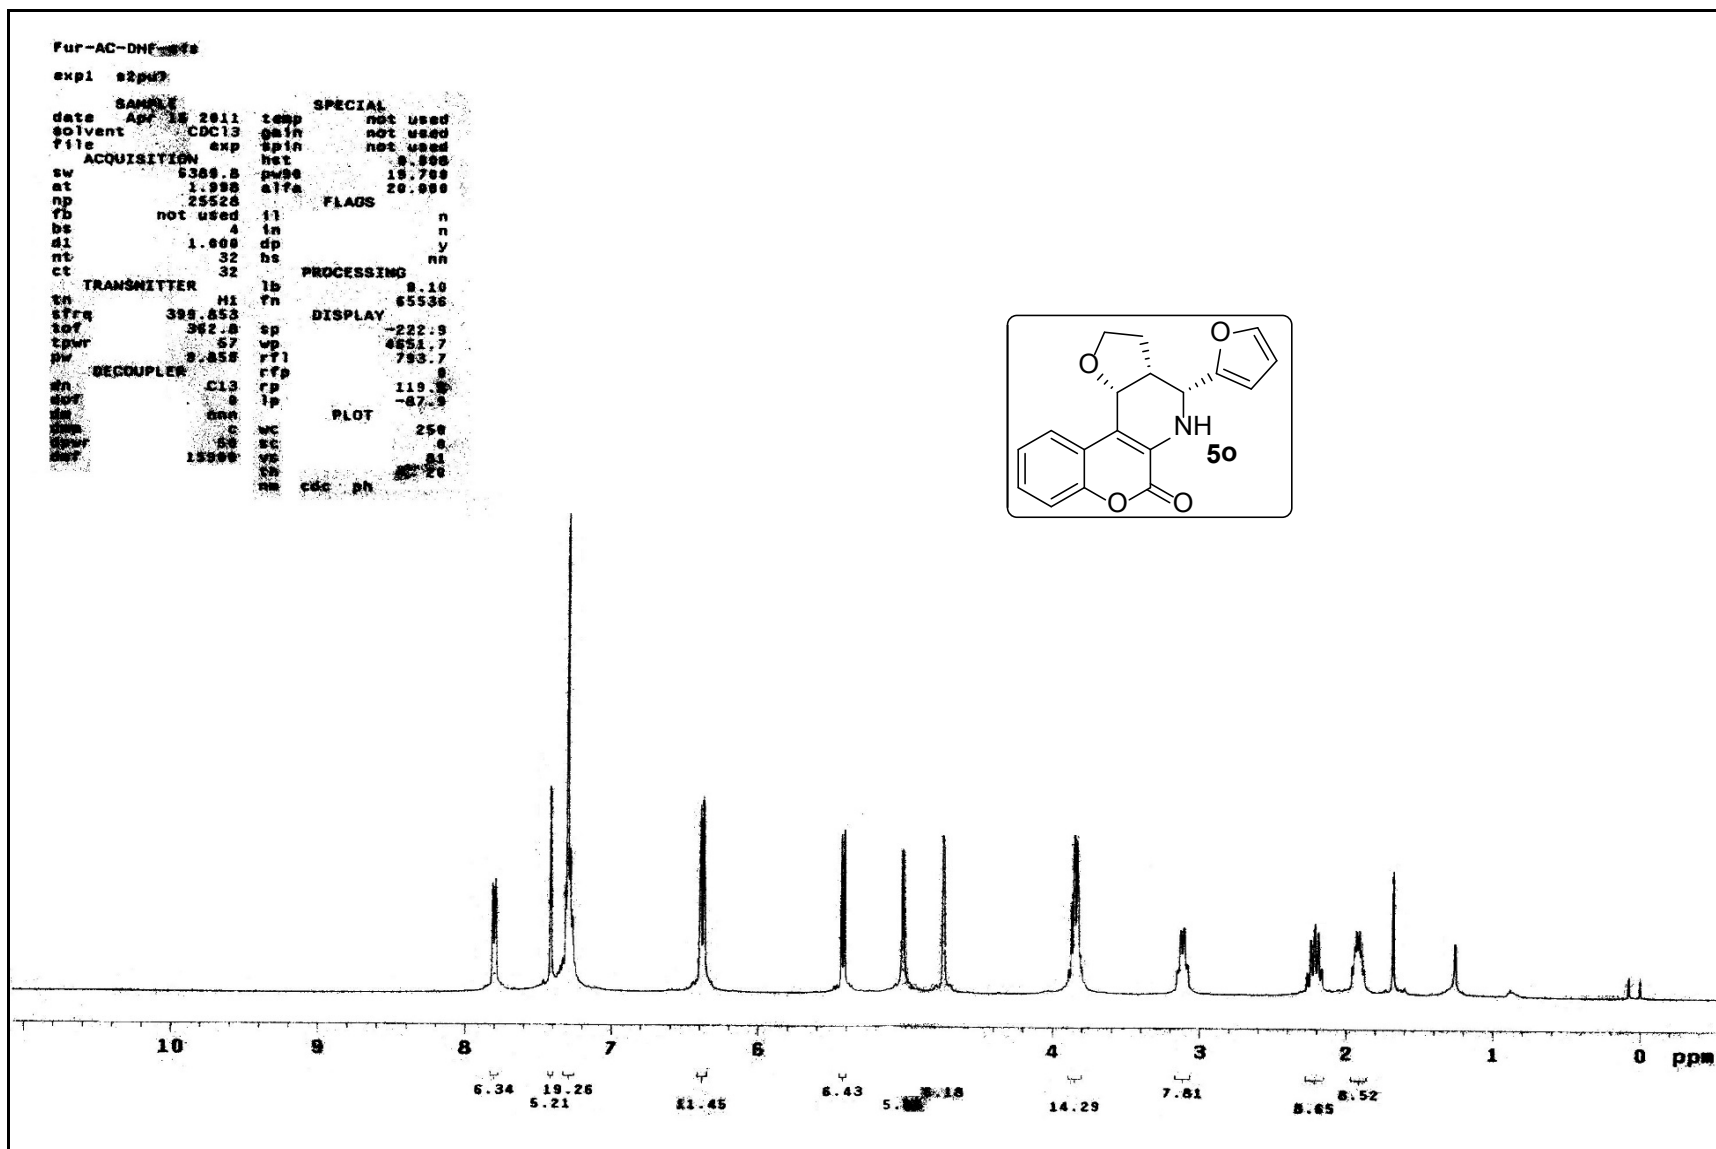



### <sup>13</sup>CNMR of Compound (50)

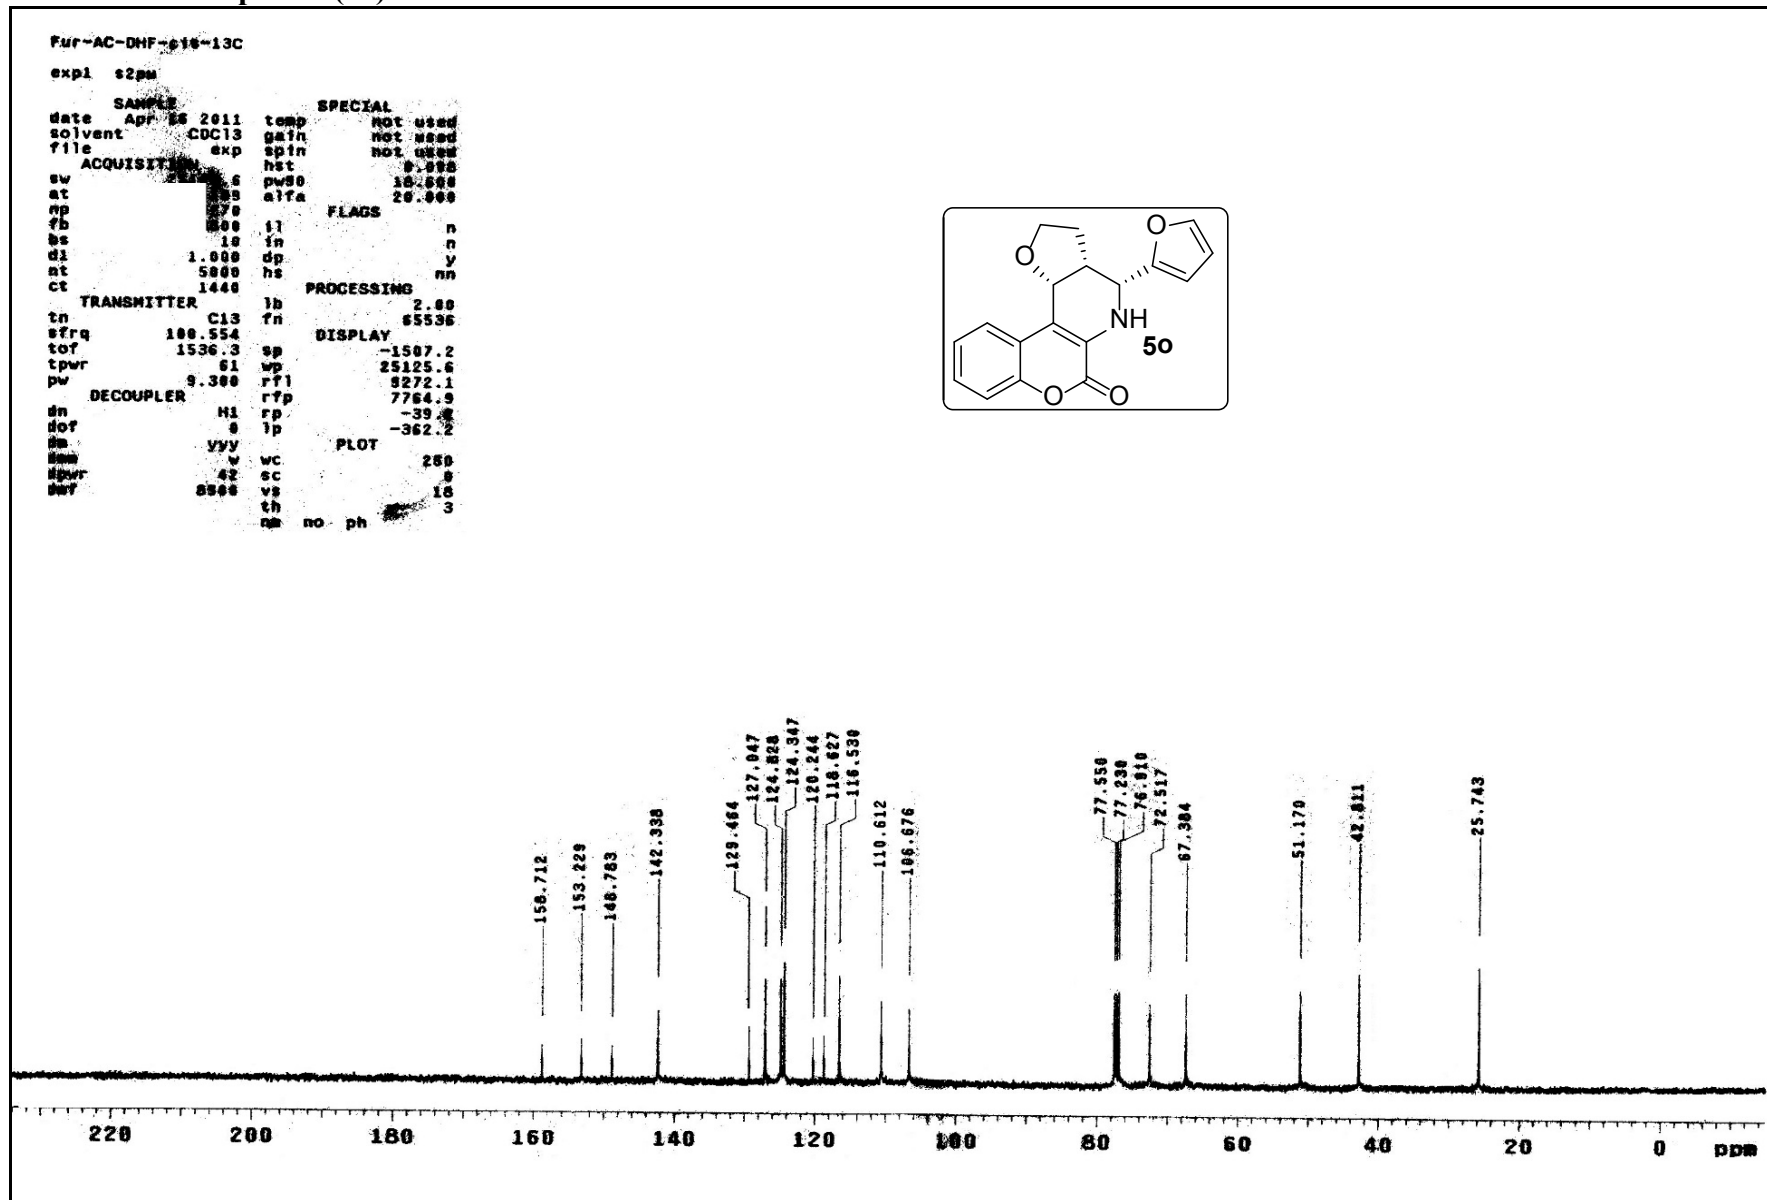

### Expansion $^1\text{H}$ NMR spectra for determining the trans : cis ratio for Compound (p)

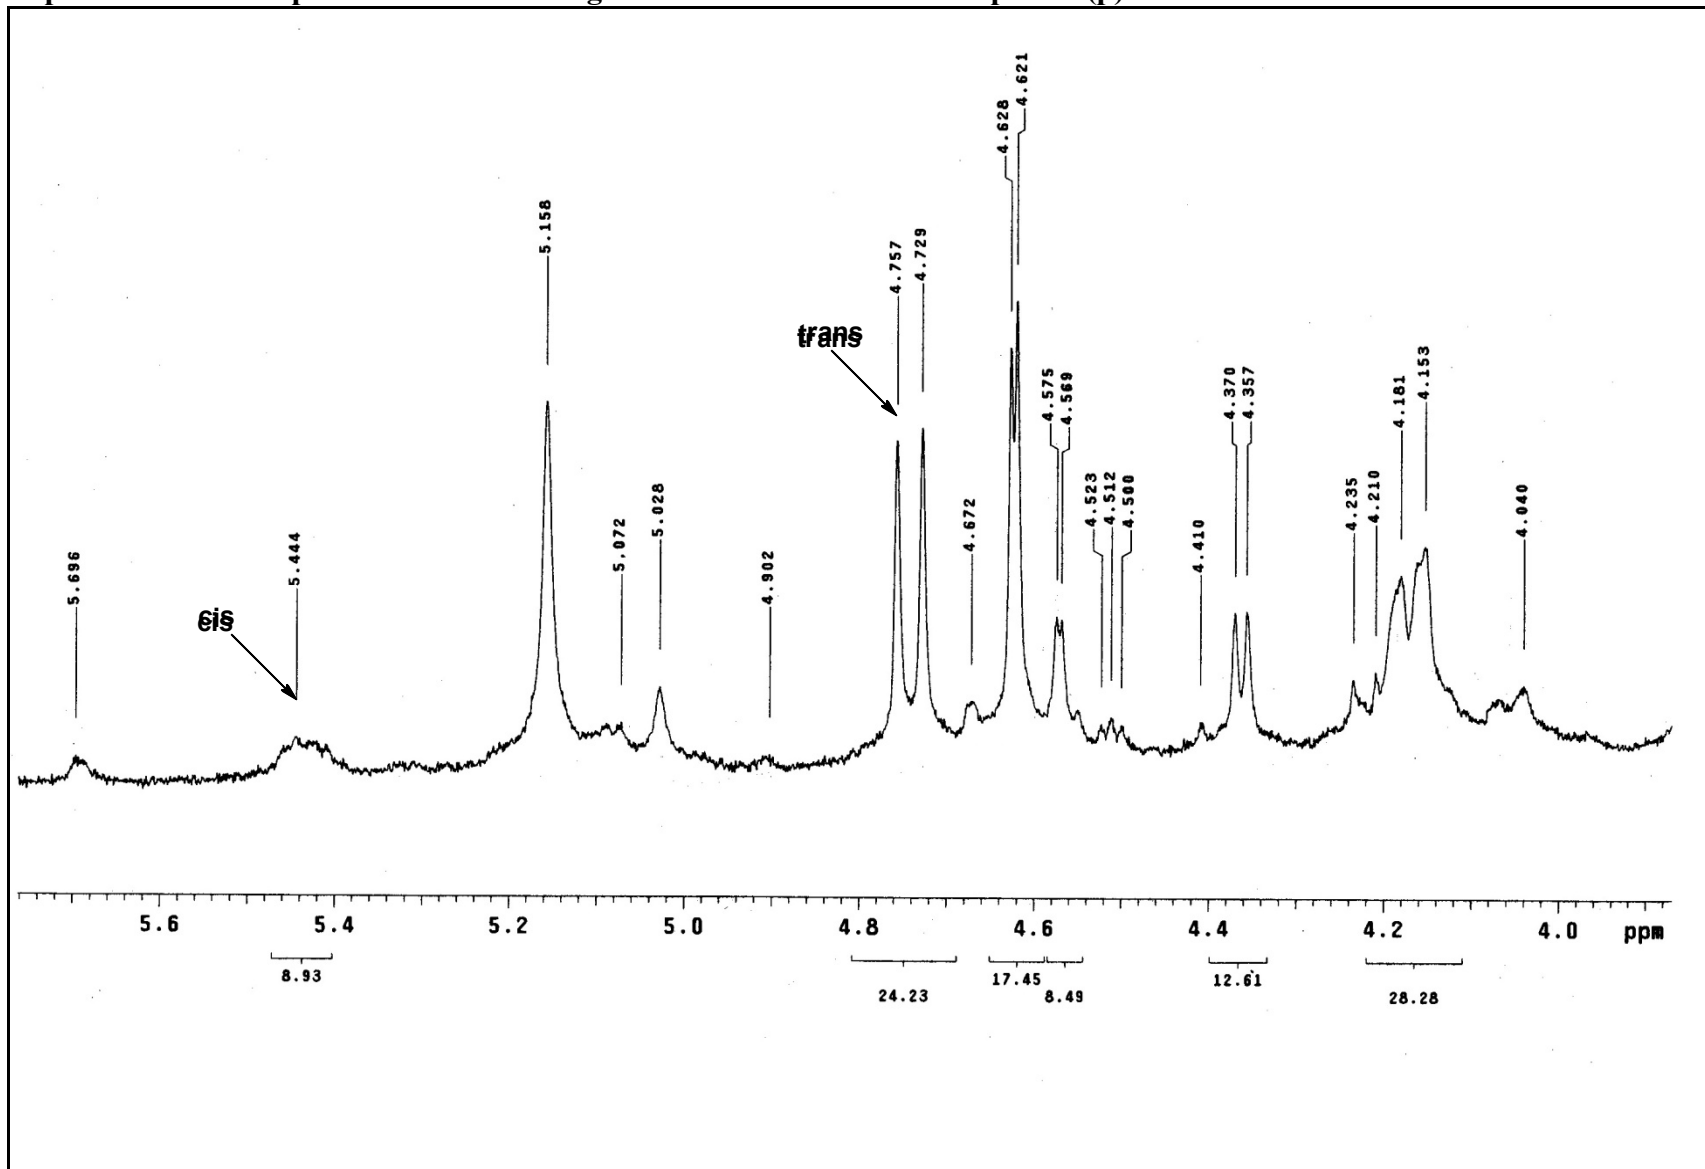

### <sup>1</sup>HNMR Spectra of Compound (4p)

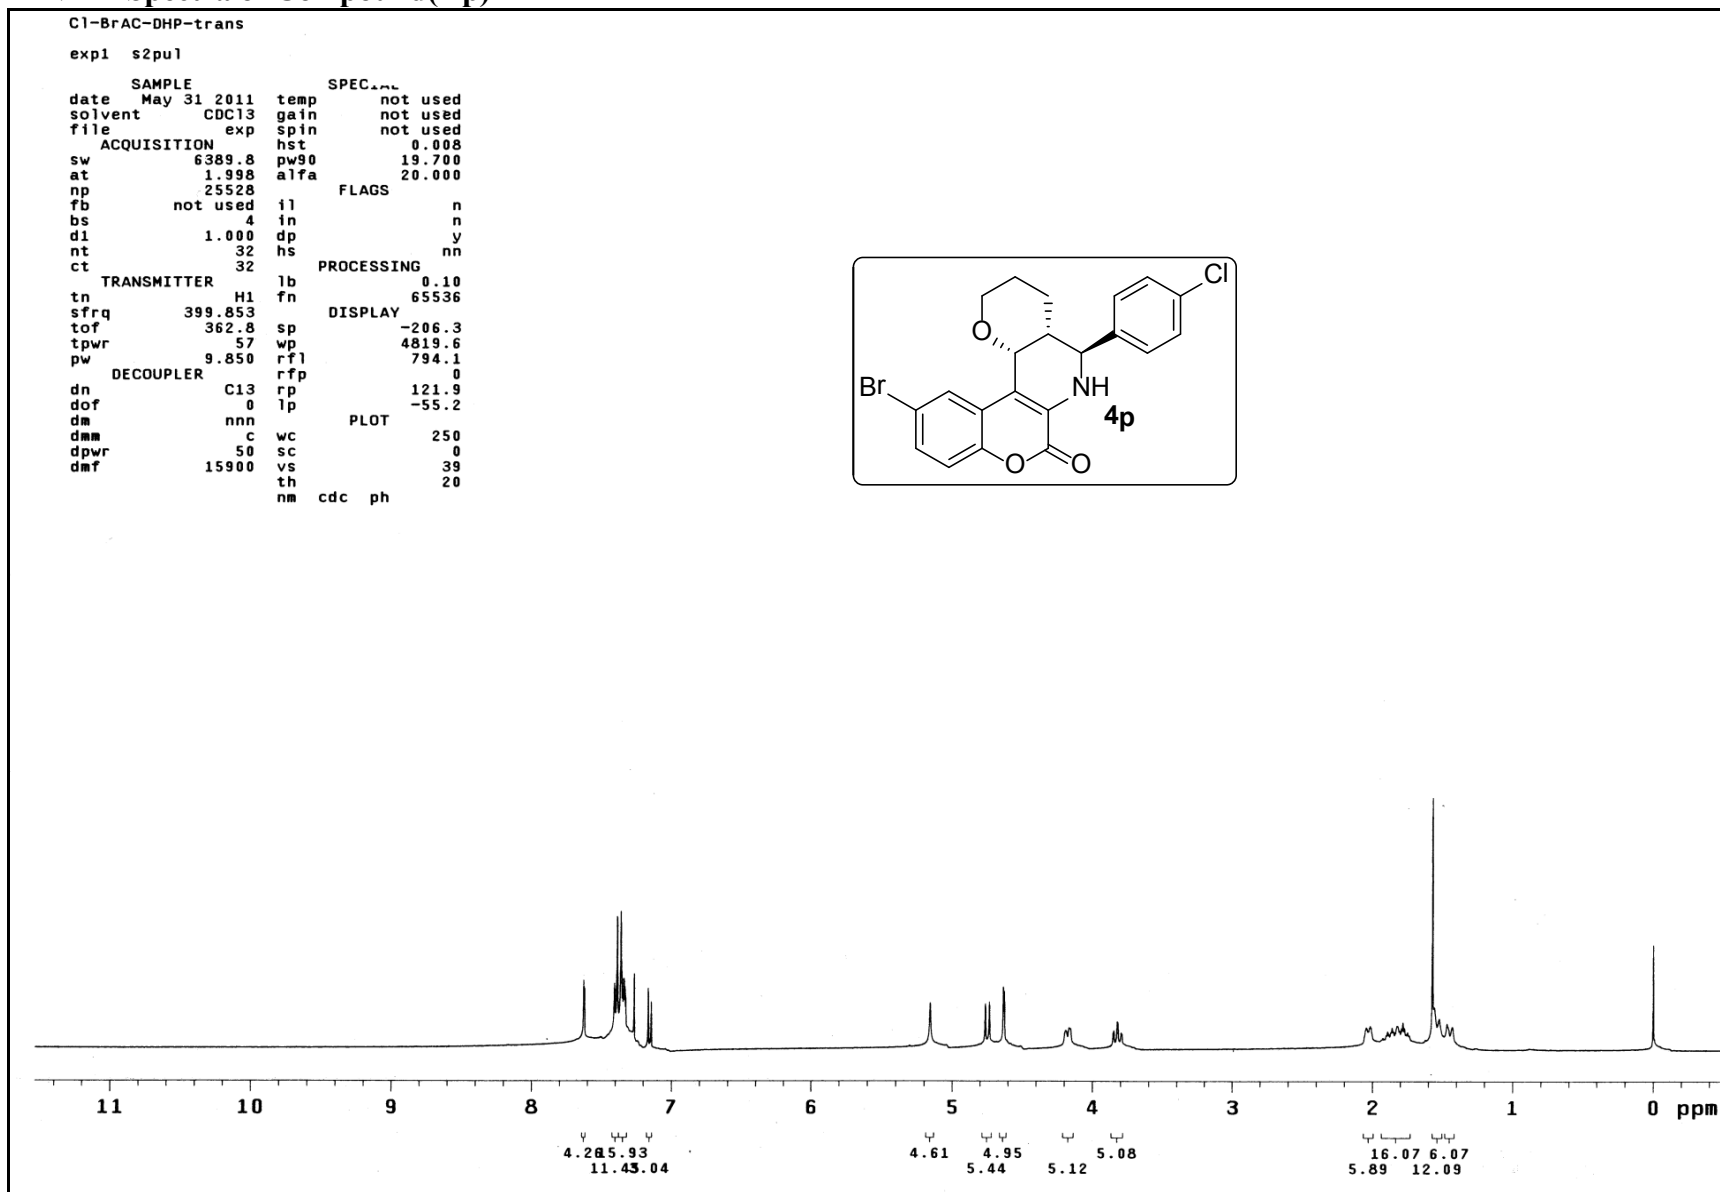

### <sup>13</sup>CNMR of Compound (4p)

Cl\_BrAC-DHP-tr-13C

expl s2pu1

| SAMPLE      |             | SPECIAL    |          |
|-------------|-------------|------------|----------|
| date        | May 31 2011 | temp       | not used |
| solvent     | CDC13       | gain       | not used |
| file        | exp         | spin       | not used |
| ACQUISITION |             | hst        | 0.008    |
| sw          | 25125.6     | pw90       | 18.600   |
| at          | 1.199       | alfa       | 20.000   |
| np          | 60270       | FLAGS      |          |
| fb          | 13800       | il         | n        |
| bs          | 10          | in         | n        |
| d1          | 1.000       | dp         | y        |
| nt          | 3000        | hs         | nn       |
| ct          | 510         | PROCESSING |          |
| TRANSMITTER |             | lb         | 2.00     |
| tn          | C13         | fn         | 65536    |
| sfrq        | 100.554     | DISPLAY    |          |
| tof         | 1536.3      | sp         | -1512.6  |
| tpwr        | 61          | wp         | 25125.6  |
| pw          | 9.300       | rfl        | 9277.5   |
| DECOUPLER   |             | rfl        | 7764.9   |
| dn          | H1          | rp         | -54.7    |
| dof         | 0           | lp         | -314.7   |
| dm          | yyy         | PLOT       |          |
| dmm         | w           | wc         | 250      |
| dpwr        | 42          | sc         | 0        |
| dmf         | 8900        | vs         | 43       |
|             |             | th         | 3        |
|             |             | nm         | no ph    |

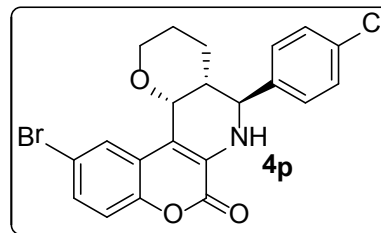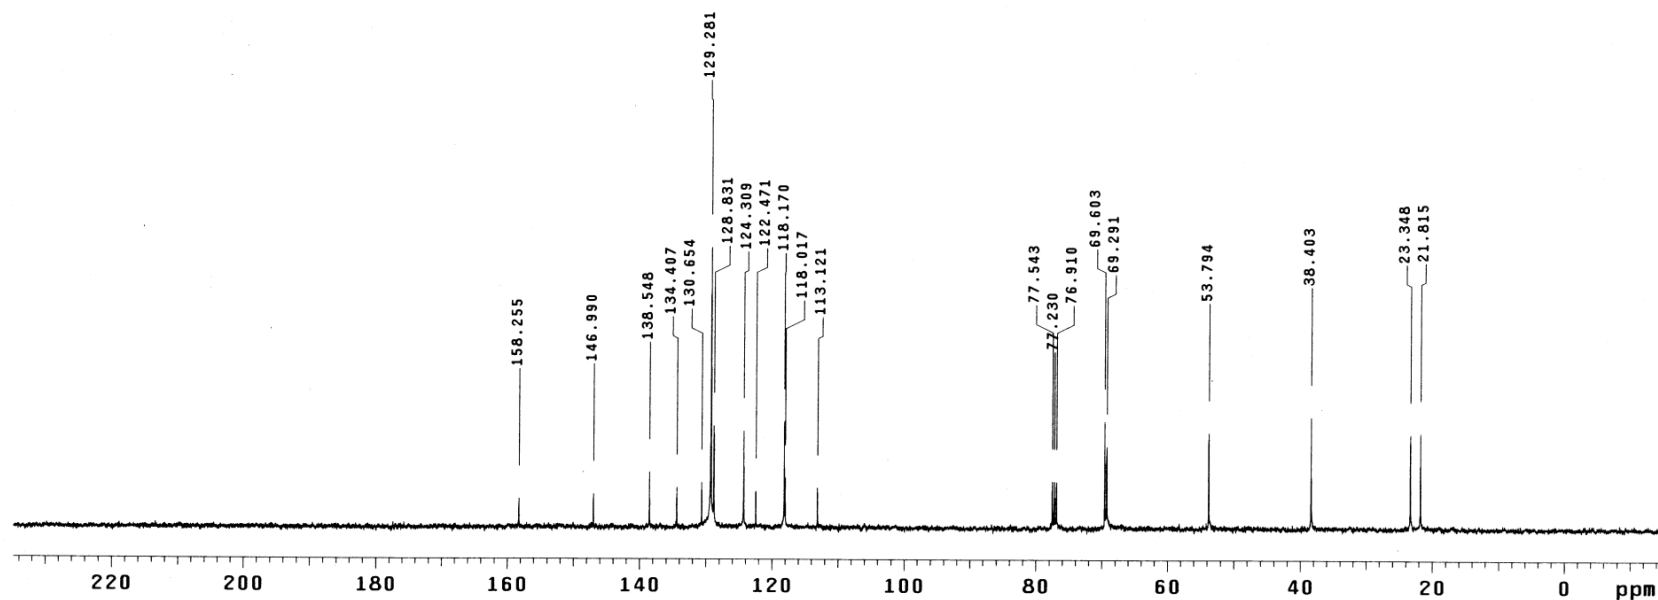

### <sup>1</sup>HNMR Spectra of Compound (p)

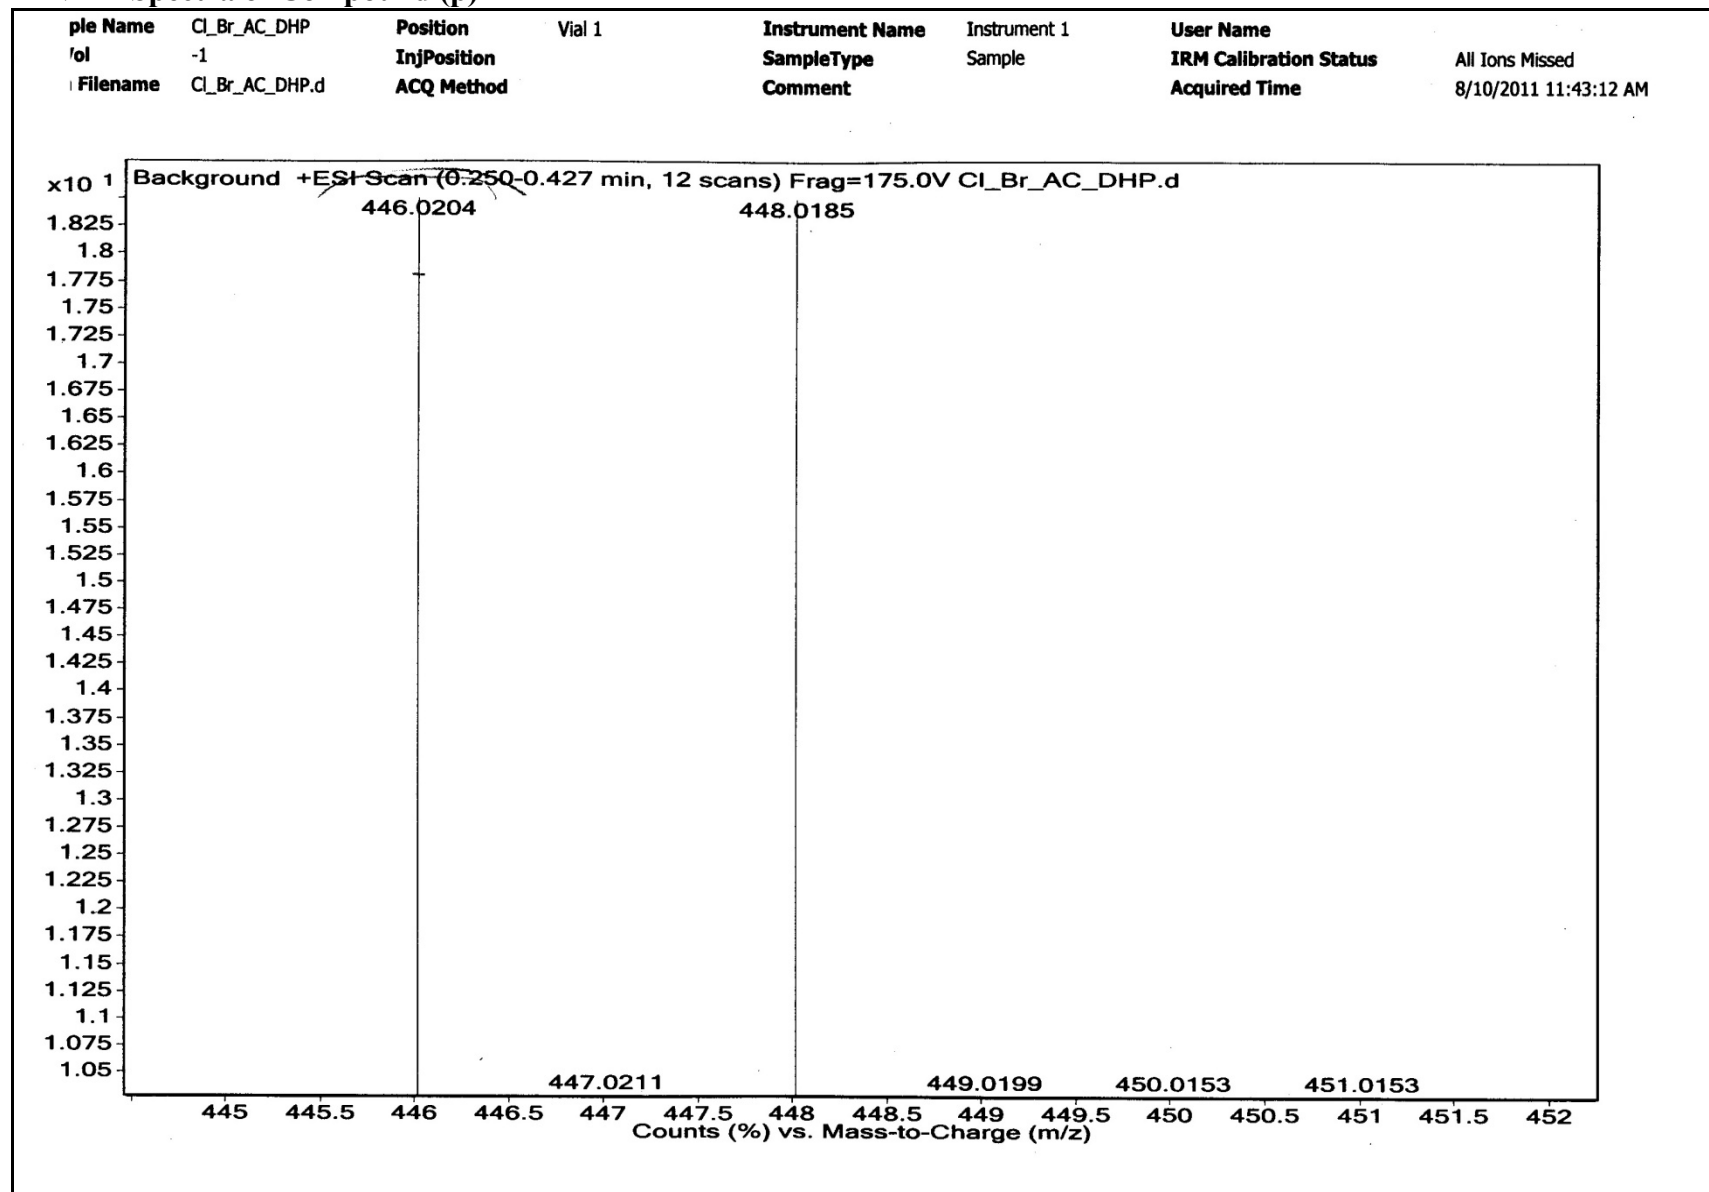

### <sup>1</sup>H NMR Spectra of Compound( 4q)

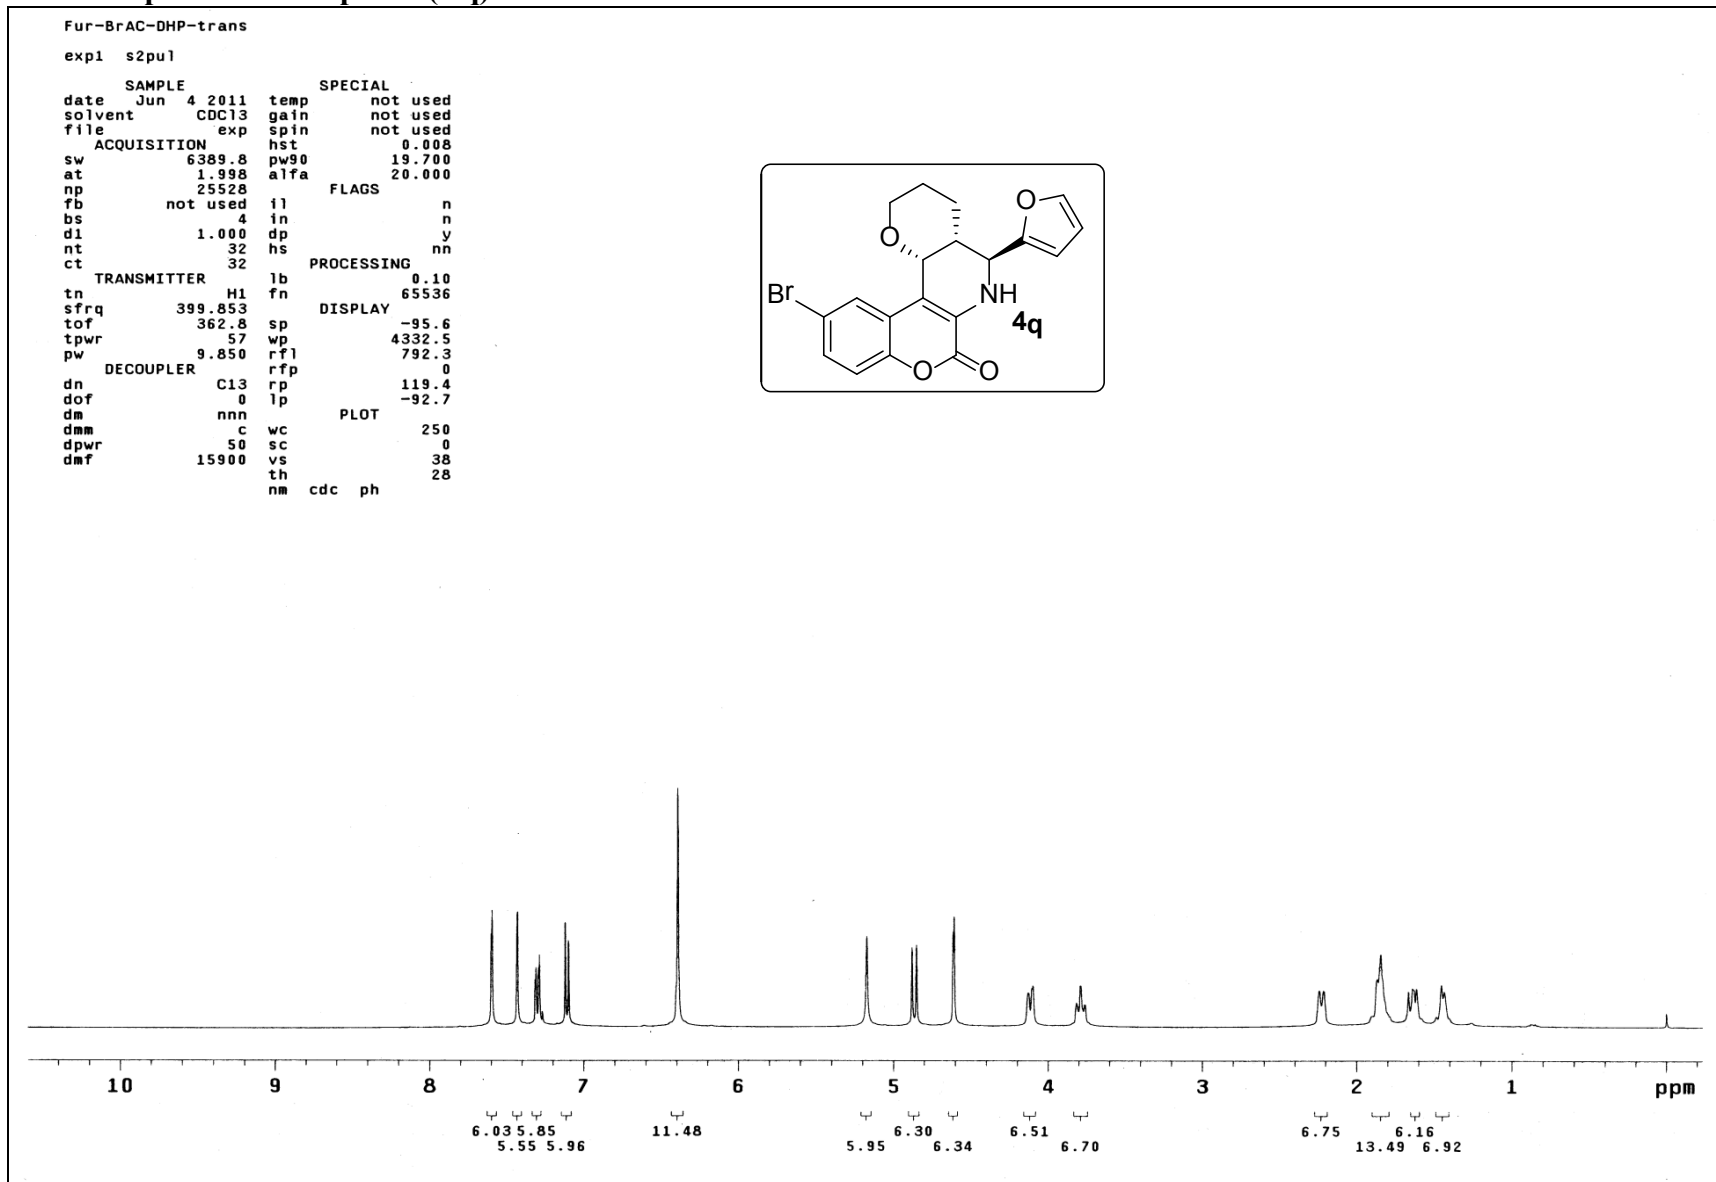

### <sup>13</sup>CNMR of Compound (4q)

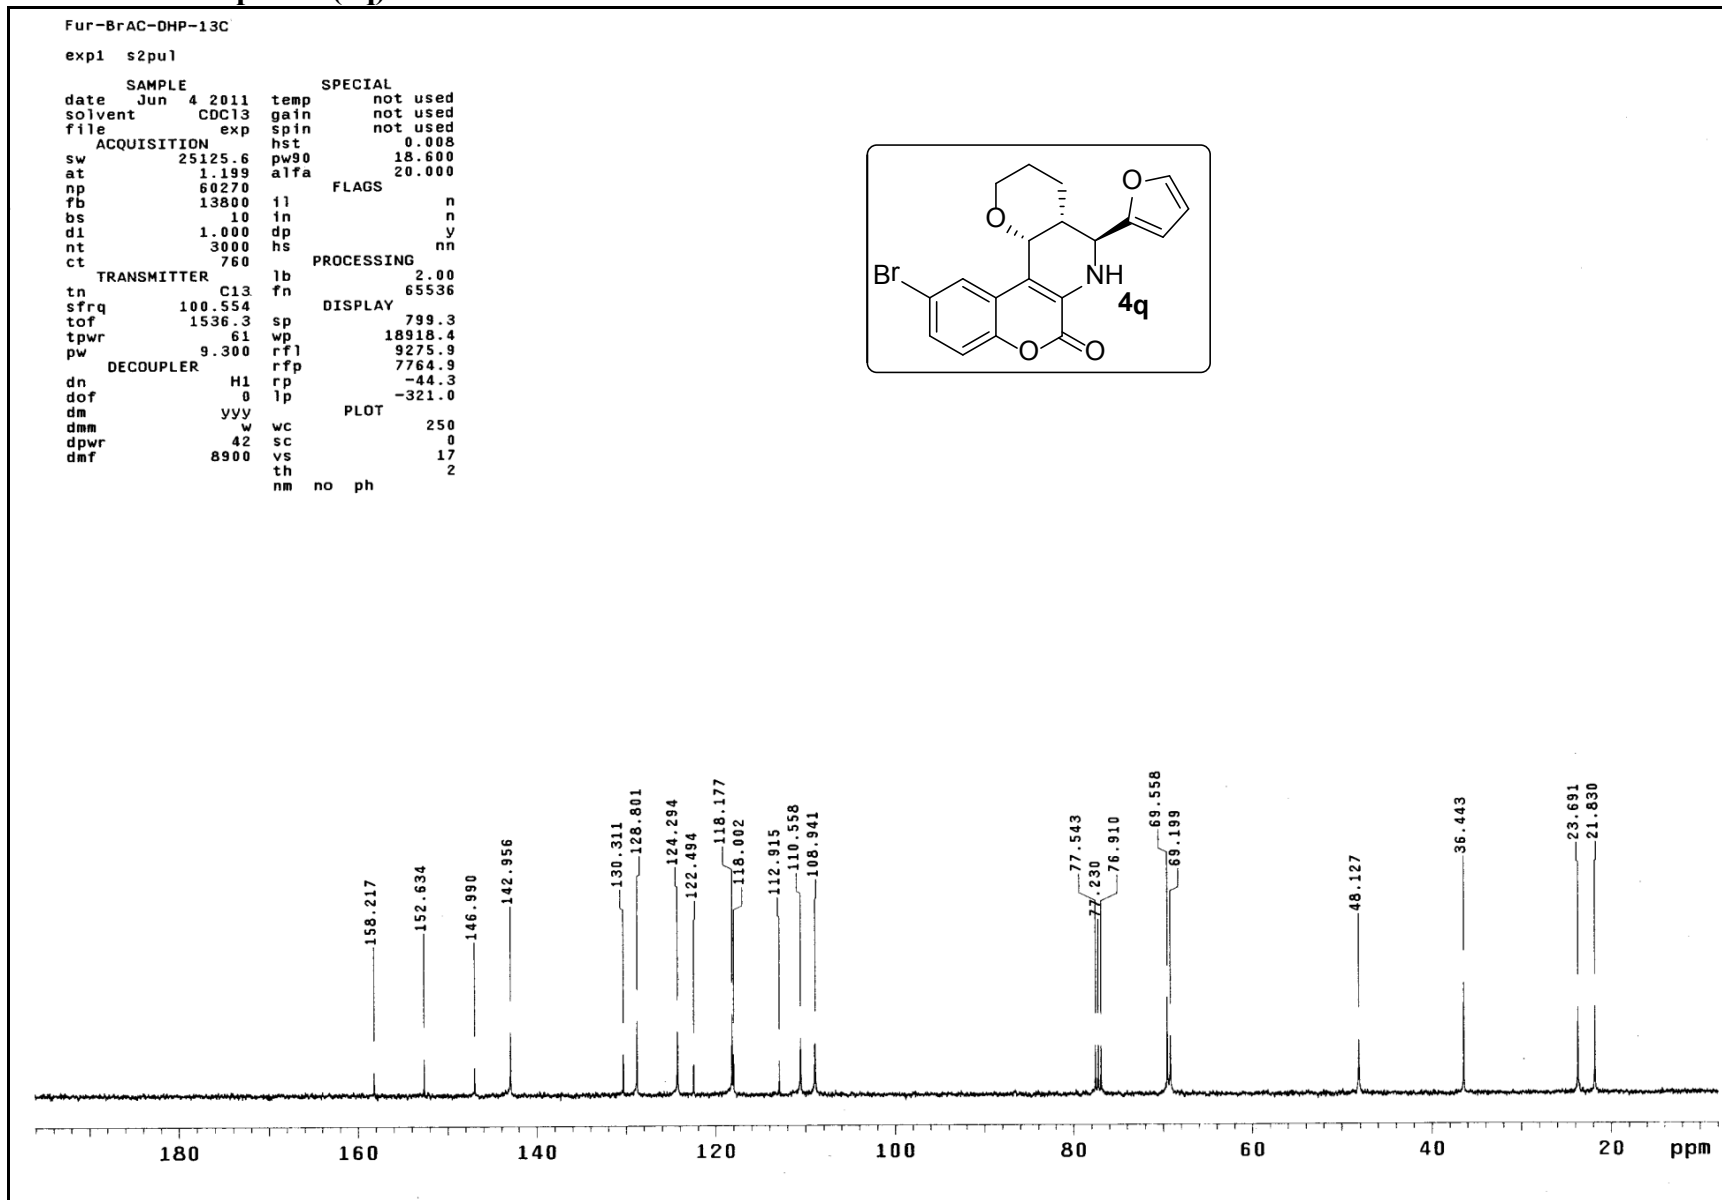

### <sup>1</sup>HNMR Spectra of Compound (5q)

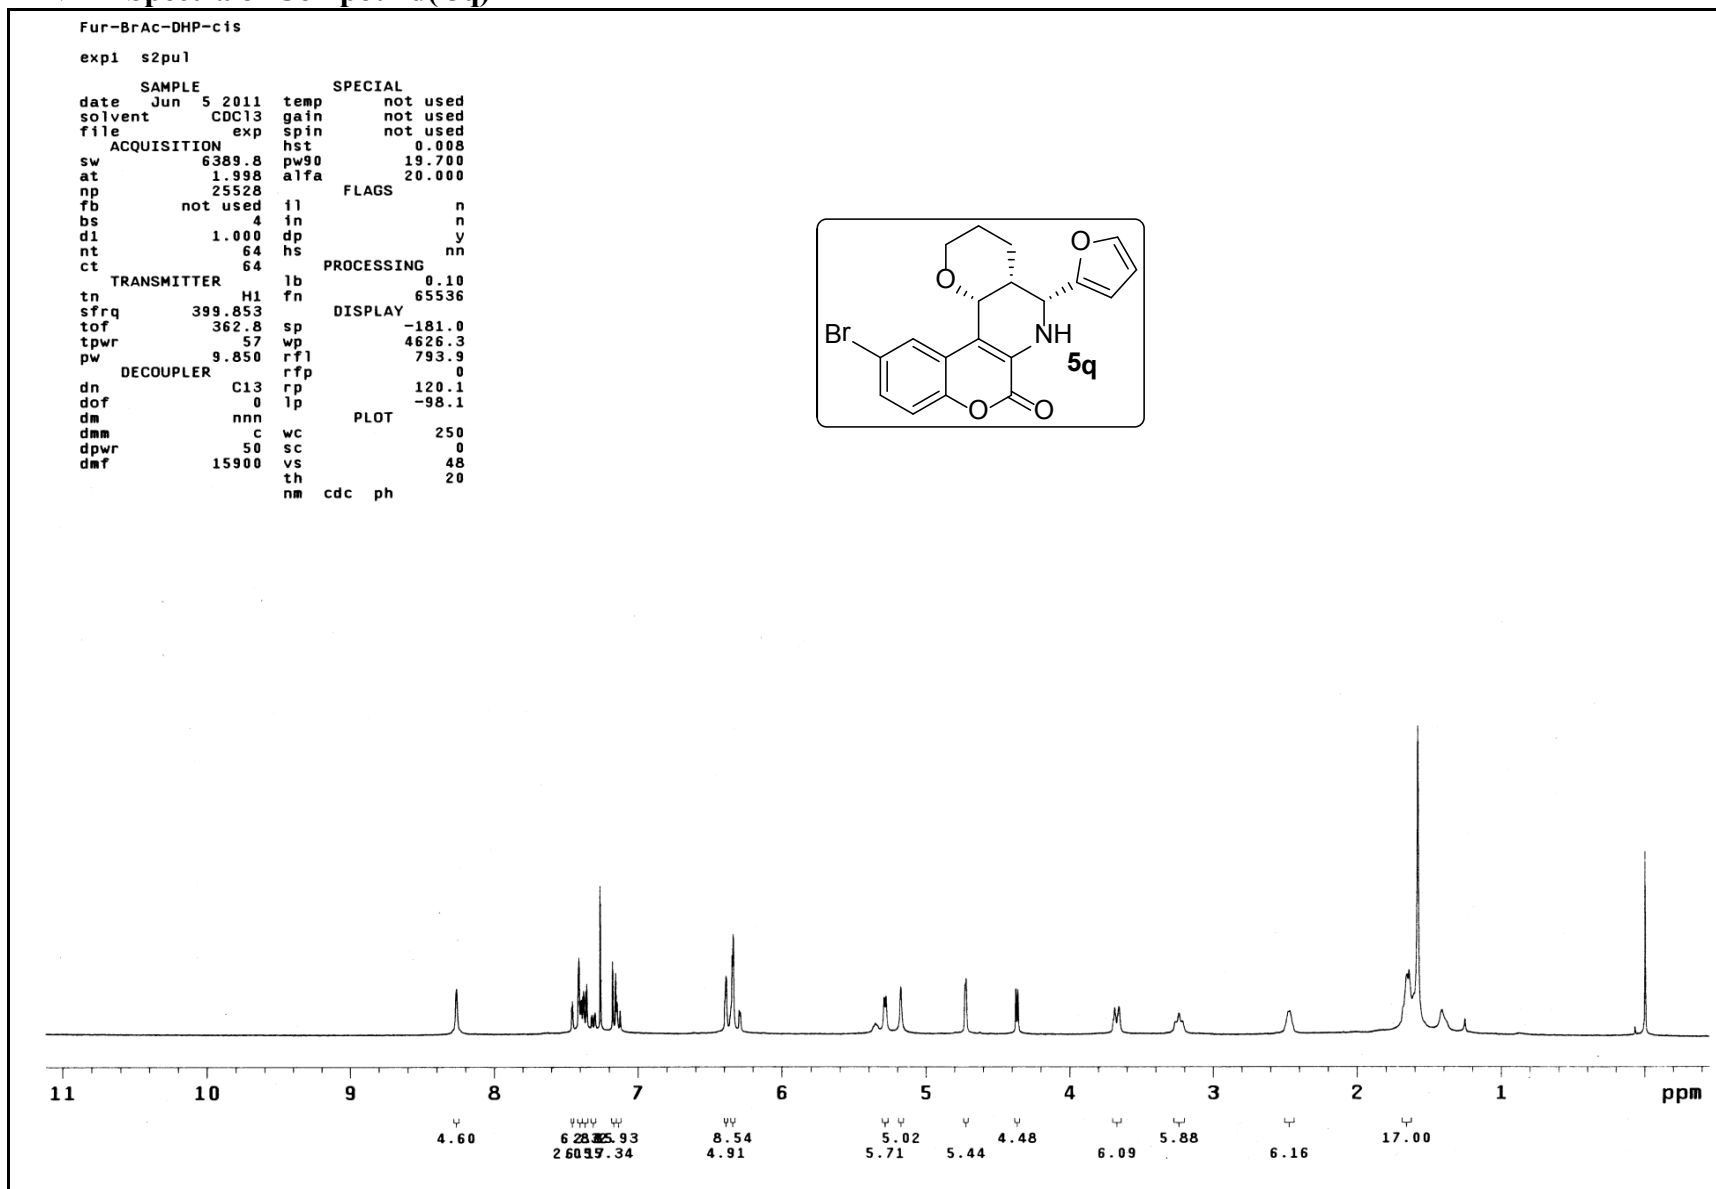



### <sup>1</sup>H NMR Spectra of Compound (4r)

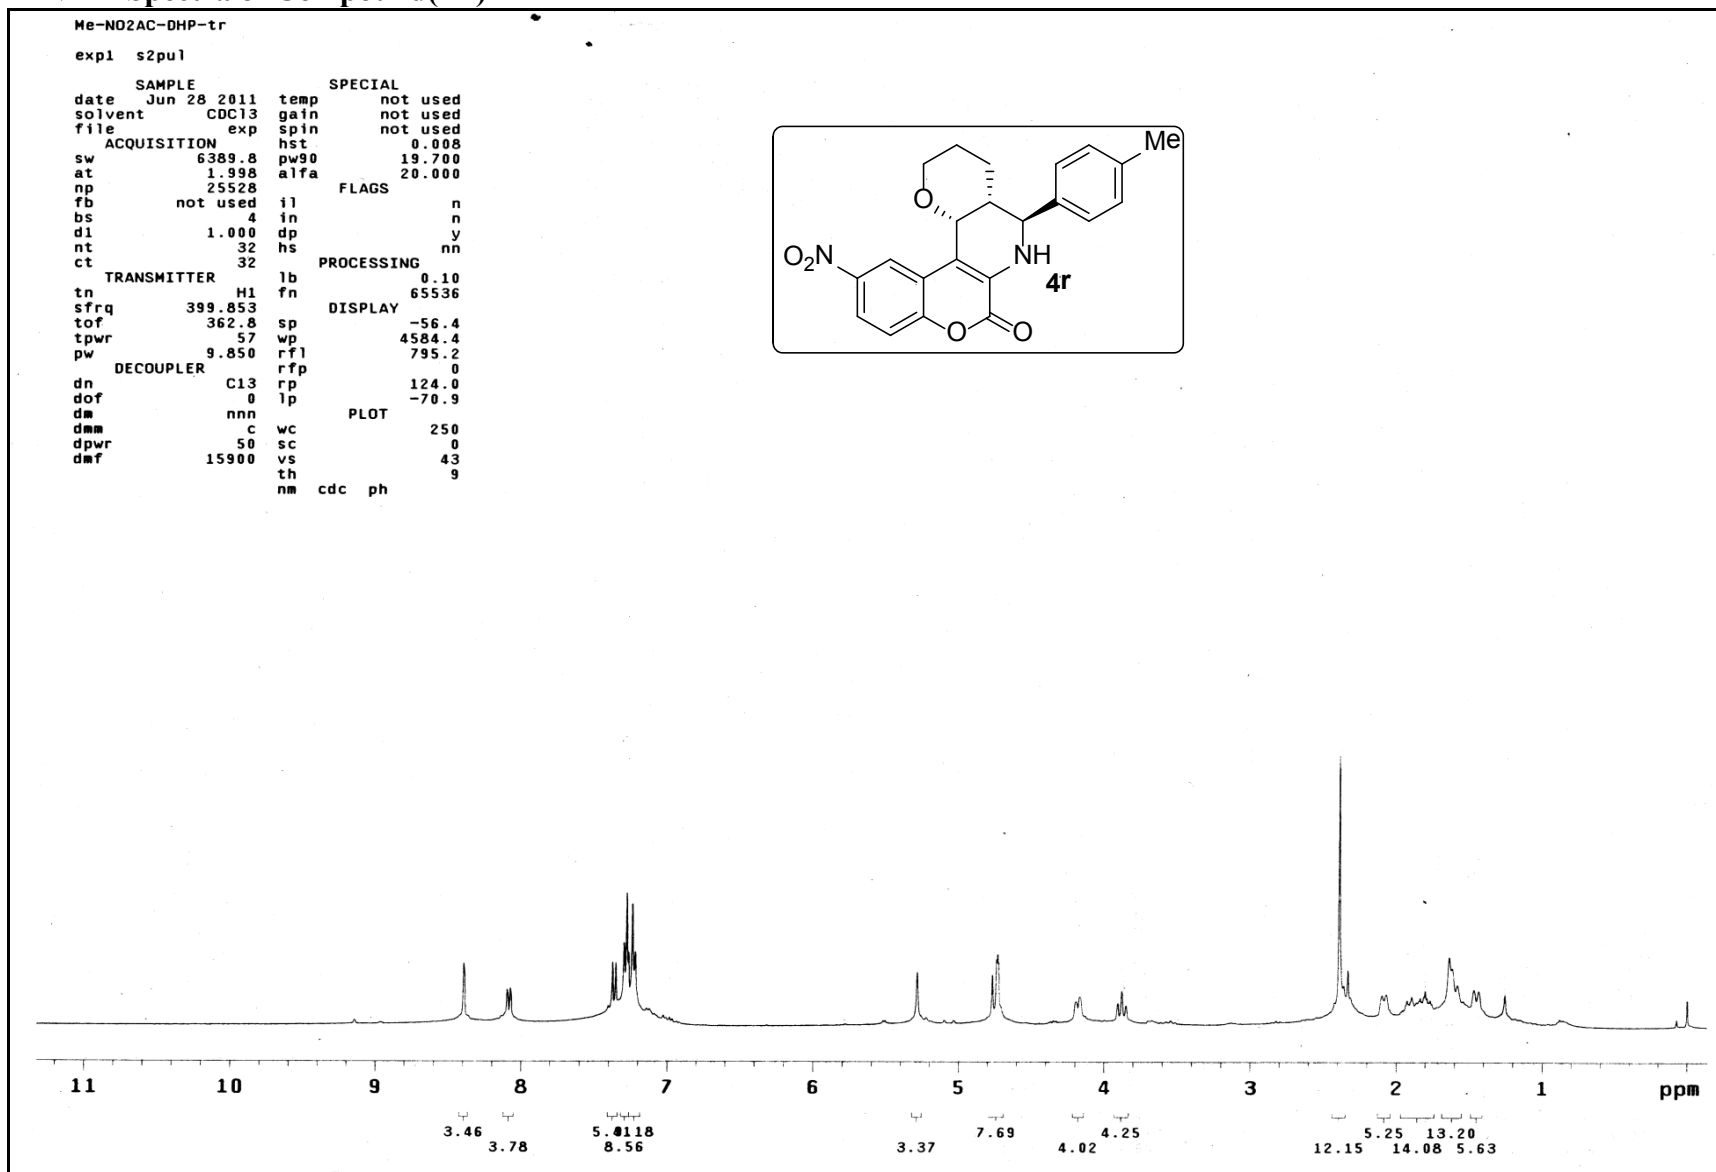

### <sup>13</sup>CNMR of Compound (4r)

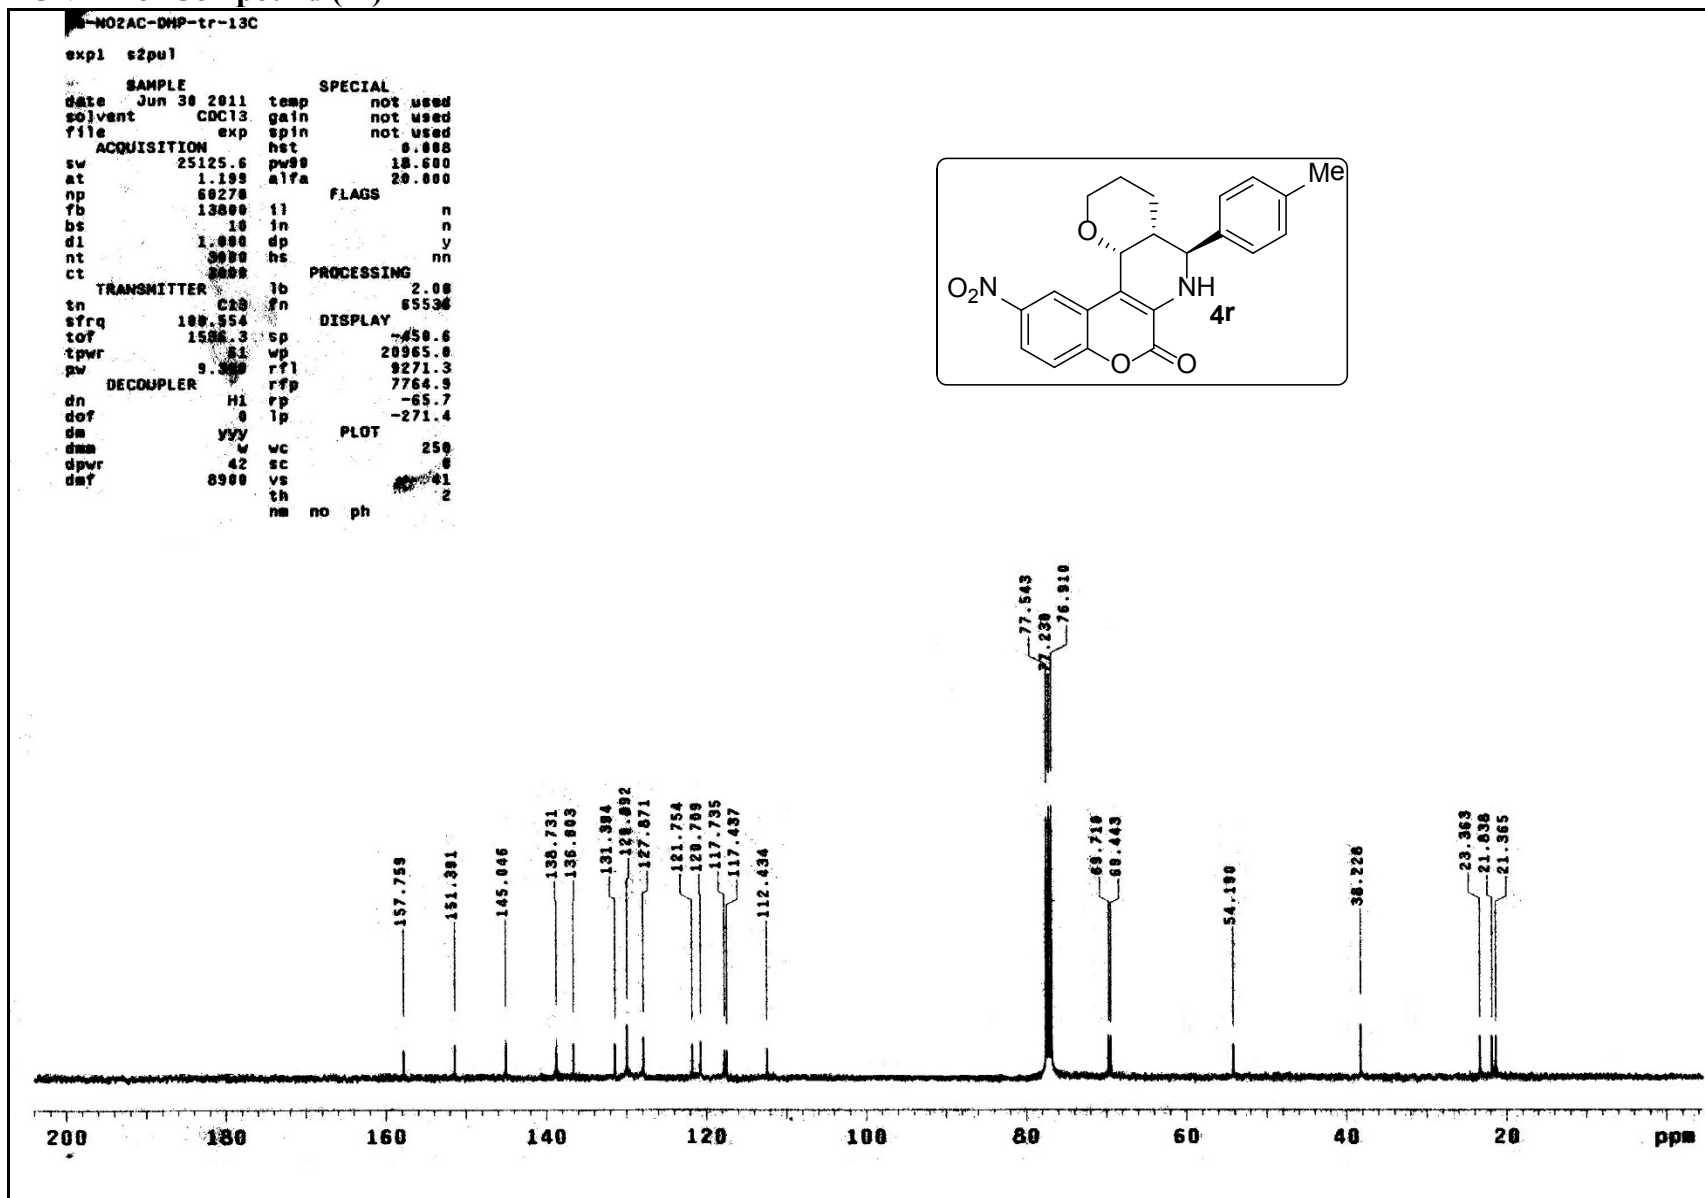

### HRMS Spectra of Compound (r)

|                      |                |                    |        |                        |              |                               |                       |
|----------------------|----------------|--------------------|--------|------------------------|--------------|-------------------------------|-----------------------|
| <b>Sample Name</b>   | CL_NO2AC_DHP   | <b>Position</b>    | Vial 1 | <b>Instrument Name</b> | Instrument 1 | <b>User Name</b>              |                       |
| <b>Inj Vol</b>       | -1             | <b>InjPosition</b> |        | <b>SampleType</b>      | Sample       | <b>IRM Calibration Status</b> | Some Ions Missed      |
| <b>Data Filename</b> | CL_NO2AC_DHP.d | <b>ACQ Method</b>  |        | <b>Comment</b>         |              | <b>Acquired Time</b>          | 8/10/2011 12:26:44 PM |

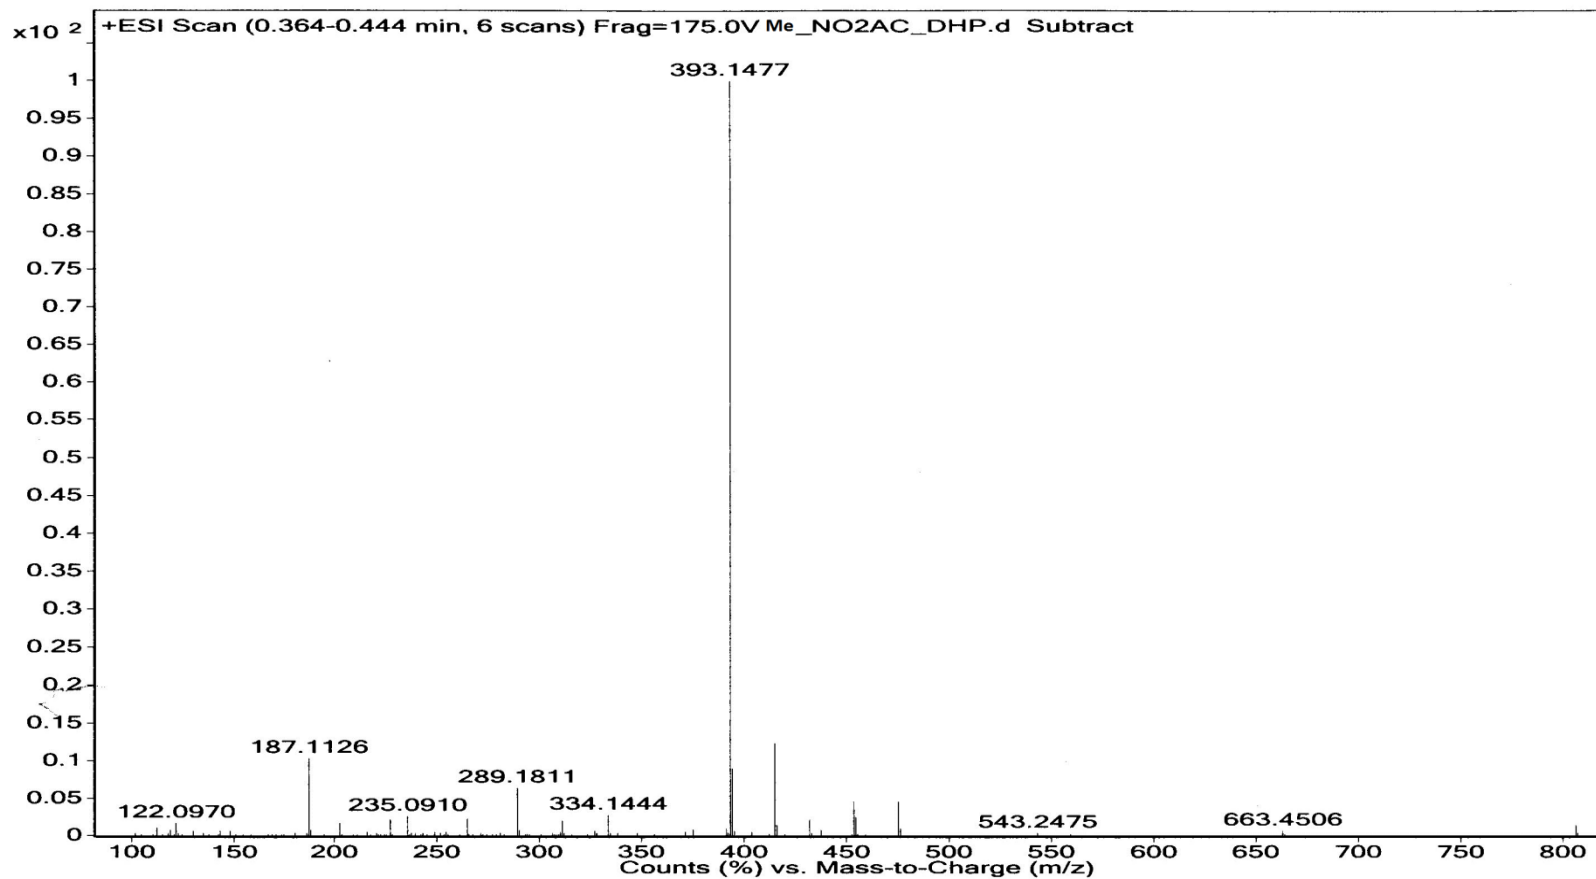

### Expansion $^1\text{H}$ NMR spectra for determining the trans : cis ratio for Compound (s)

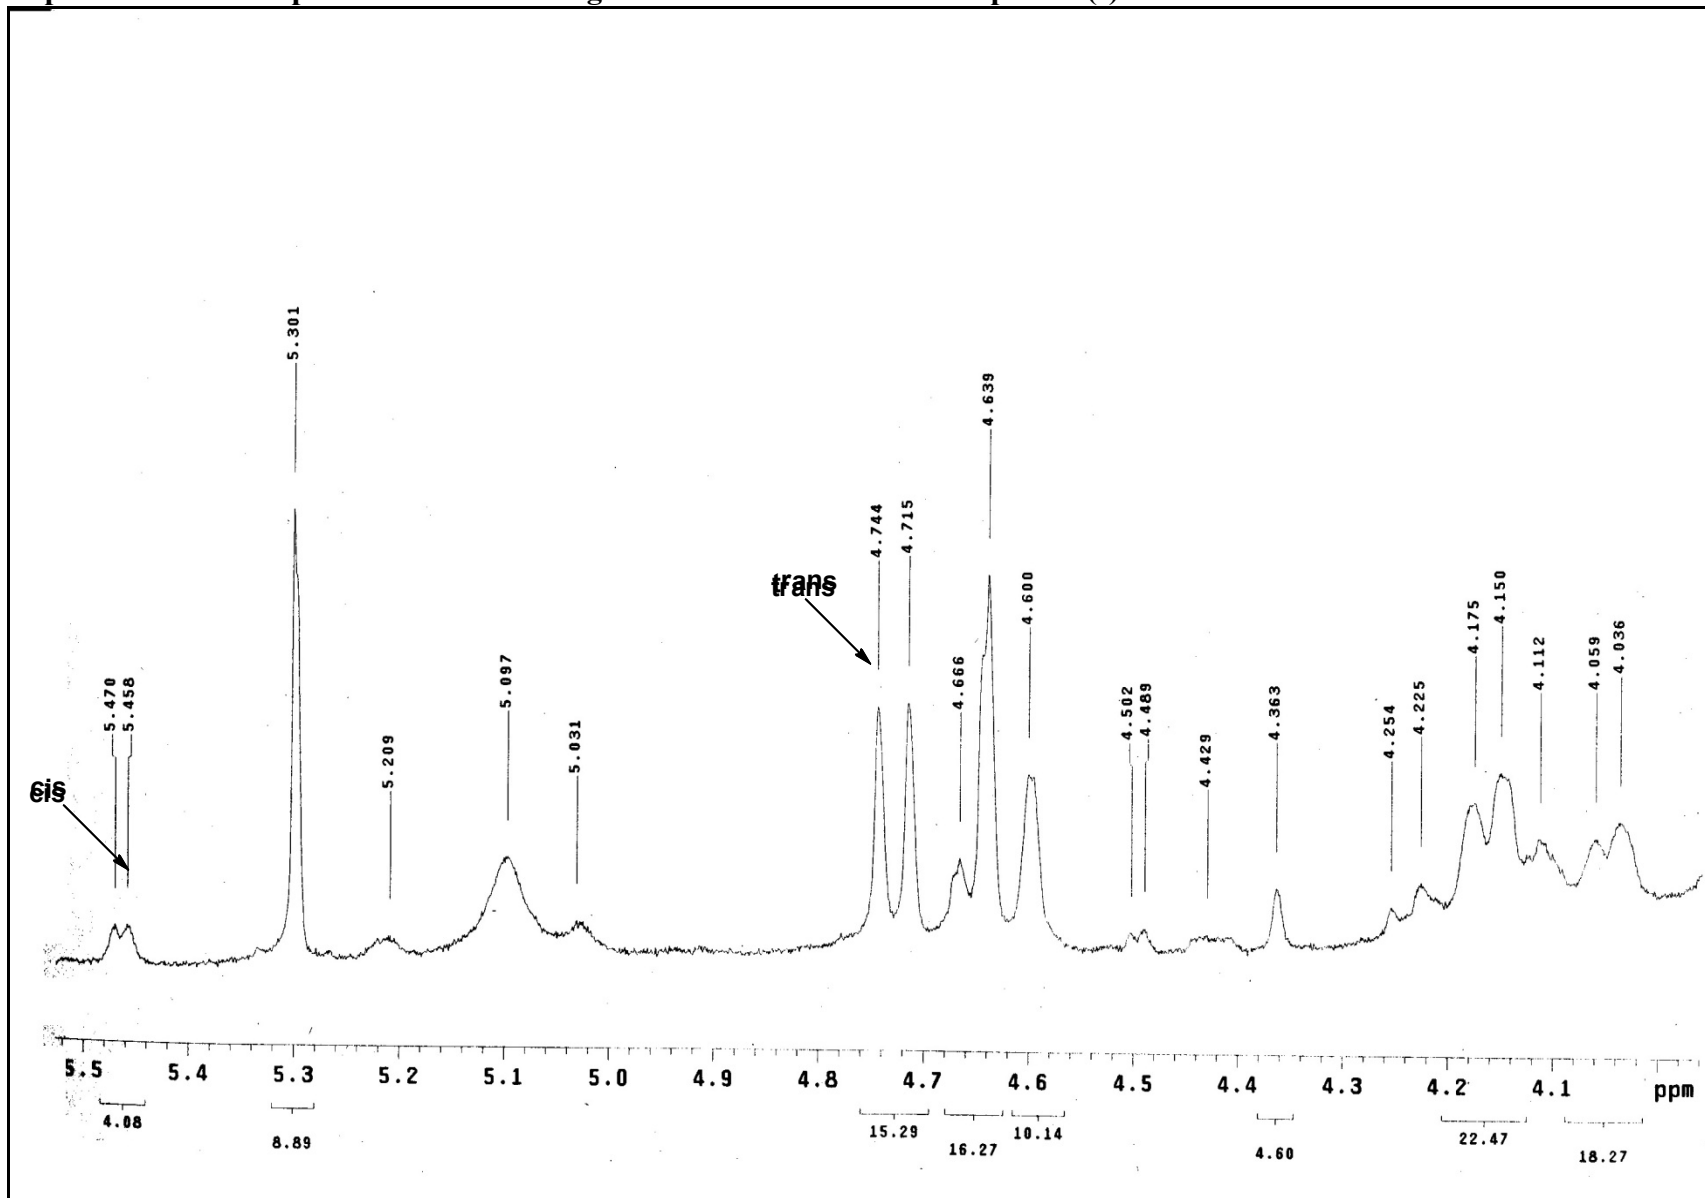

### <sup>1</sup>H NMR Spectra of Compound (4s)

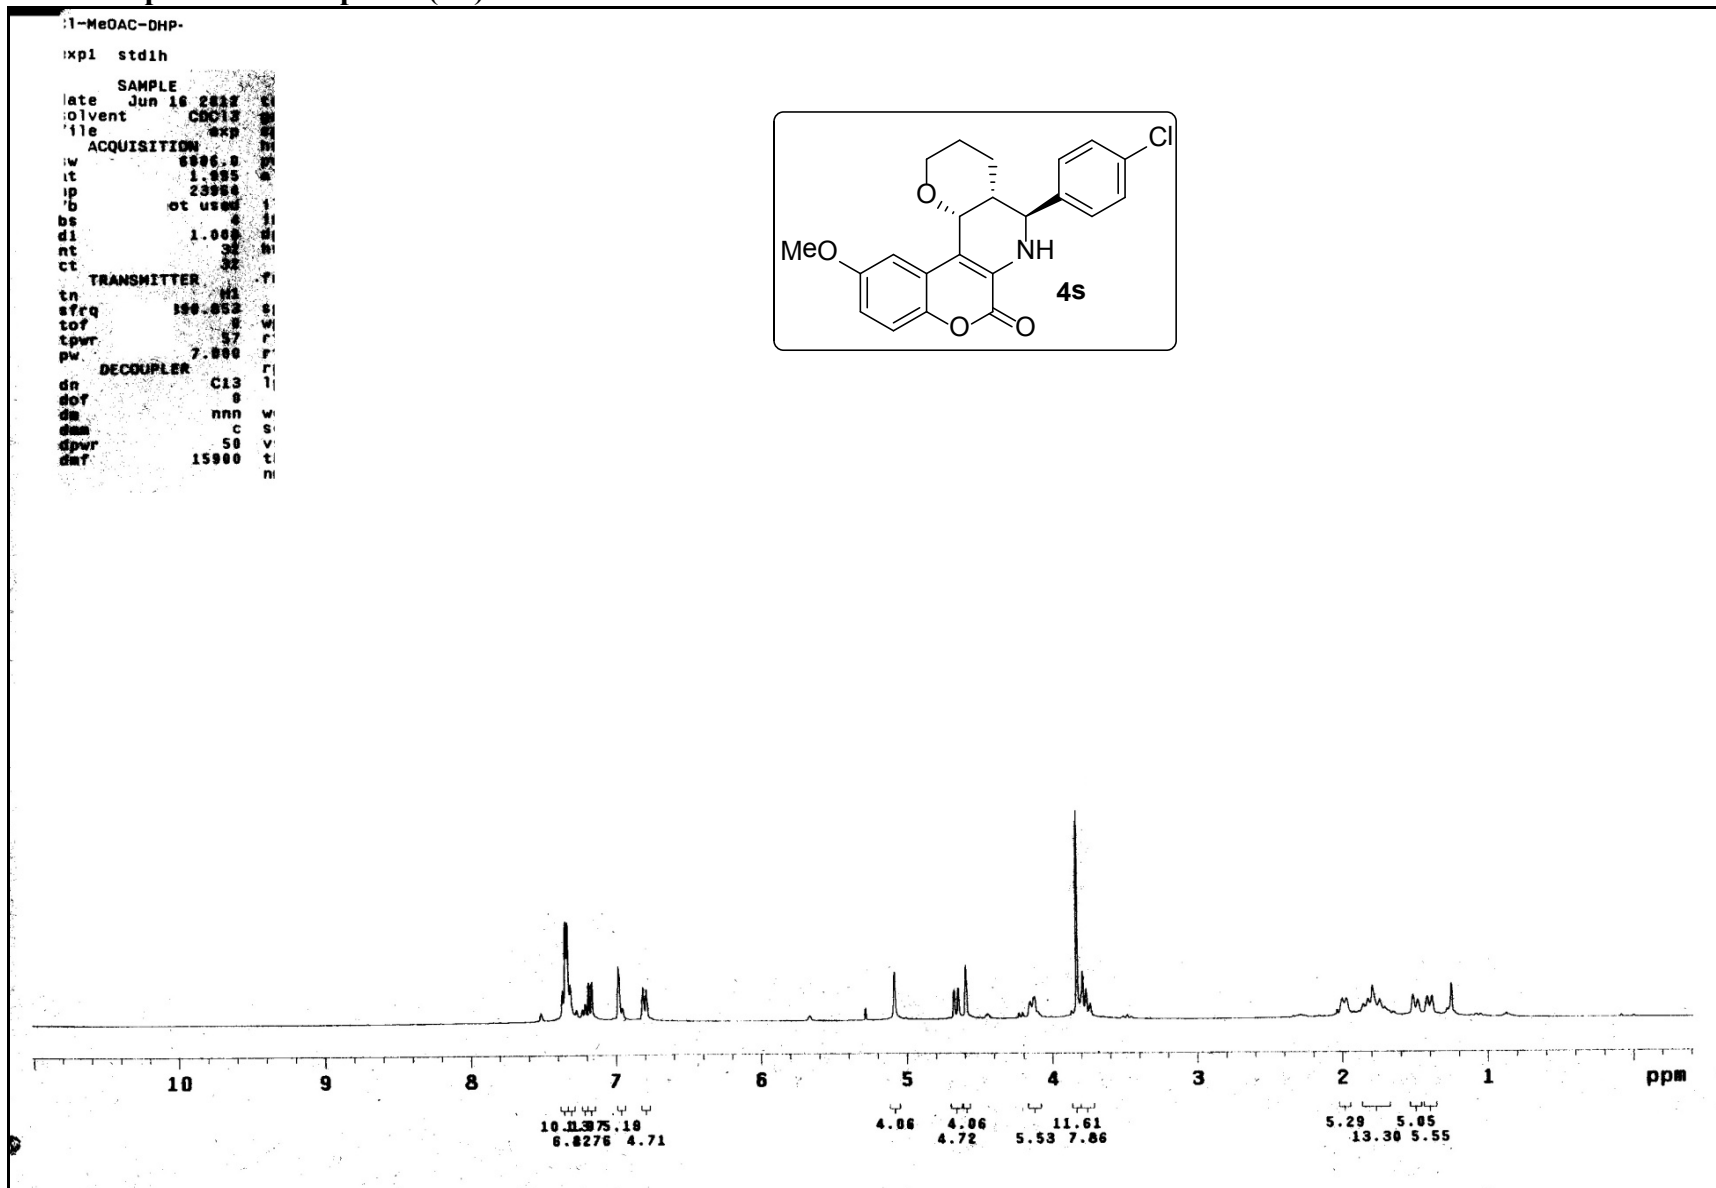

### <sup>13</sup>CNMR of Compound (4s)

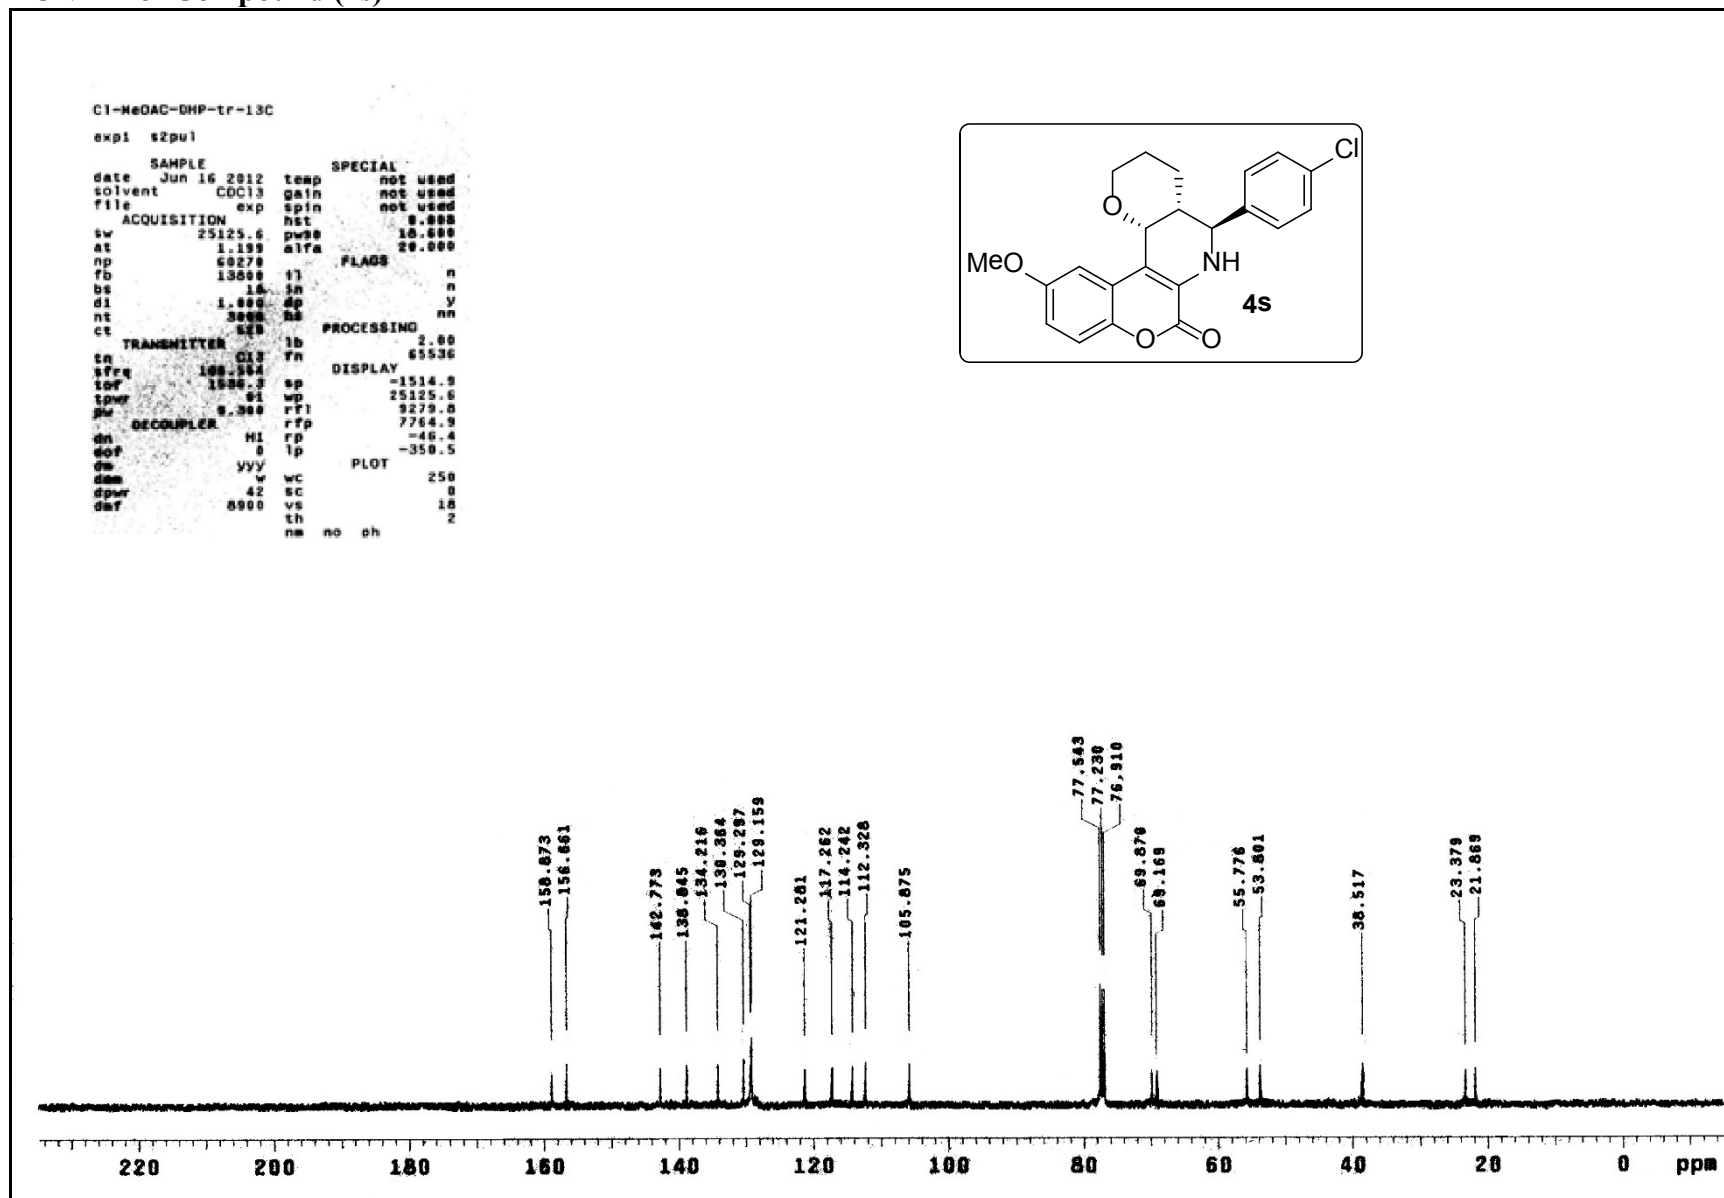

### HRMS Spectra of Compound (s)

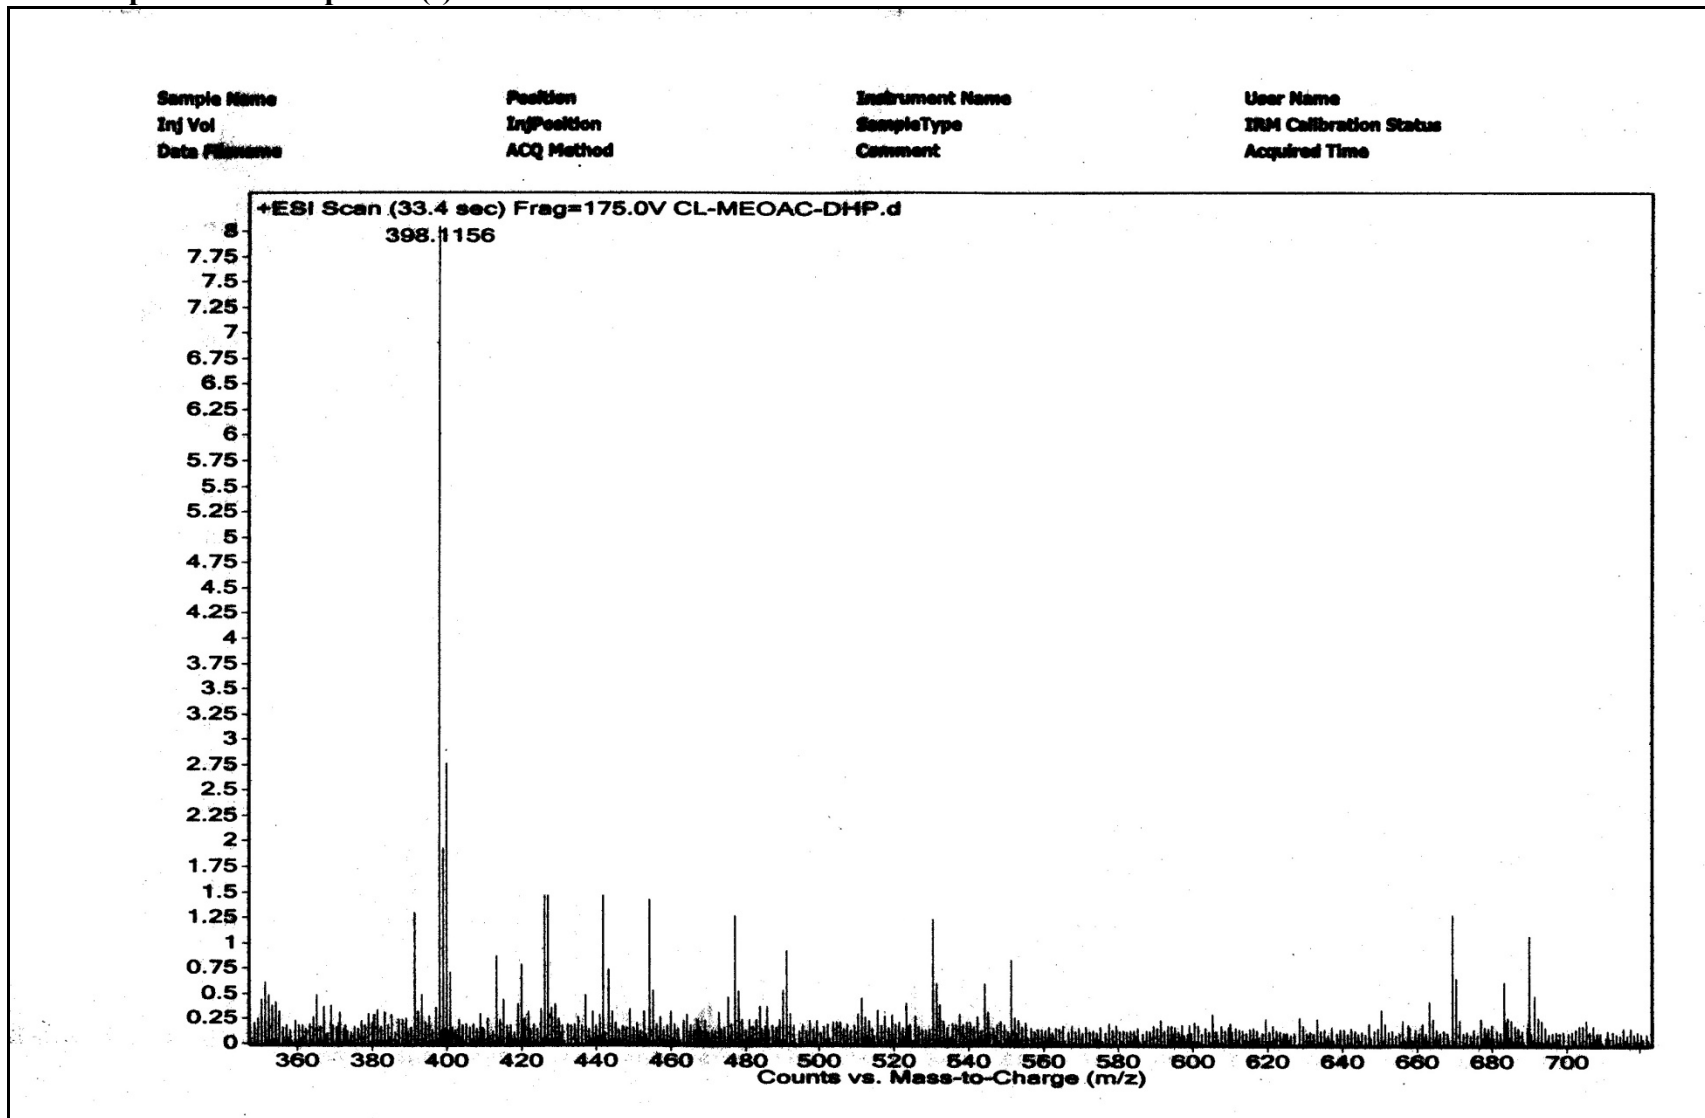

Supplement: c3ra45174g.pdf [file c3ra45174g.pdf]
